# Supplementary material for: A Combination of Screening and Computational Approaches for the Identification of Novel Compounds That Decrease Mast Cell Degranulation
Source: PubMed Central journal article supplement — J Biomol Screen. 2015 Jul;20(6):720–8. doi: 10.1177/1087057115579613 (PMC4512528; doi:10.1177/1087057115579613), 2015-07
Supplement: 10.1177_1087057115579613_Supp.pdf [file 10.1177_1087057115579613_Supp.pdf]

**COVER SHEET for SUPPLEMENTAL MATERIAL**

**McShane et al JBSC-15-0007**

**Includes Supplemental Methods and Material, Figure and Tables**

## **Supplementary Methods and Materials**

### Reagents, Cells and Antibodies

Rat anti-Dinitrophenyl (DNP) IgE monoclonal antibody was acquired from Biozol (BZL06936), dinitrophenyl-conjugated human serum albumin (A6661), DMSO (D2650) and Triton X-100 (T9284) were from Sigma, 4-methylumbelliferyl-N-acetyl- $\beta$ -D-glucosaminide (474502) and Syk inhibitor (574711) from Calbiochem. LY294002 was from Cell Signaling.

RBL-2H3 cell line was purchased from ATCC and grown in cell culture media Supplements were obtained from Invitrogen and fetal bovine serum (A15-151) was from PAA Laboratories.

Hela Kyoto cells were grown in DMEM High Glucose (Gibco) with 10% FCS and penicillin/streptomycin.

Antibodies were all purchased from Cell Signaling (pAkt, S473 and T308, tAkt).

Phosphate buffered saline (PBS) and 1 M HEPES were provided by the in-house service facility. Tyrode's buffer (TyB) consisted of Minimum Essential Medium without Phenol Red (Invitrogen) supplemented with 2 mM L-glutamine (Invitrogen) and 20 mM HEPES. DNP-HSA was dissolved to 1 mg/ml in Millipore water. MUG substrate solution consisted of 2.5 mM 4-methylumbelliferyl-N-acetyl- $\beta$ -D-glucosaminide in 0.05 M citrate, pH 4.5; stop solution was 0.1 M NaHCO<sub>3</sub>/0.1 M Na<sub>2</sub>CO<sub>3</sub>, pH 10.

The BCA Protein Assay Kit (23225) was from Pierce. Other reagents were standard laboratory grade or better.

### Protein Lysate and Western blotting

RBL-2H3 and HeLas lysates were made by washing the cells twice with PBS and then adding 1% Triton X-100 Tris lysis buffer (1 mM EGTA, 1 mM EDTA, 150 mM NaCl, 20 mM Tris, pH 7.5) with protease and phosphatase inhibitors added freshly. Standard procedures were used for SDS-PAGE and Western blotting.

## **Supplementary Figure Legend**

Supplementary Figure 1: Compounds reduced both T308 and S473 phosphorylation of Akt in unstimulated RBL-2H3 cells. (A) RBL-2H3 cells were treated with vehicle, J607Y, J775Y and Miltefosine for one hour, lysates were made and run on the pAkt/tAkt MSD plates. No stimulation was performed on the cells and still decreased pAkt. (B) Representative Western blot analysis of Akt in the RBL-2H3 cells. Membranes were probed for pAkt-S473 and pAkt-T308, stripped and then reprobed for tAkt. (C) No decrease in Akt phosphorylation in compounds that had no decrease in degranulation. Compounds that did not decrease degranulation (J516E, J563Y, J776Y) also did not alter pAkt. Syk inhibitor significantly decreased pAkt. All experiments were performed in triplicate. Asterisks indicate statistical significance (ANOVA,  $p \leq 0.05$ ).

Supplementary Table 1: Degranulation assay results and safety index ranking.

Supplementary Table 2: Parameters of the endocytic assay.

Supplementary Table 3: Endocytic profiles for each compound.

Supplementary Table 4: Compounds in each cluster.

Supplementary Table 5: Correlation results of the endocytic profiles to the genome-wide screen RNAi dataset.

Supplementary Table 6: Enrichment results using WebGestalt.

Supplementary Figure 1. Compounds reduced both T308 and S473 phosphorylation of Akt in unstimulated RBL-2H3 cells and there is no decrease in Akt phosphorylation in compounds that show no decrease in degranulation.

A.

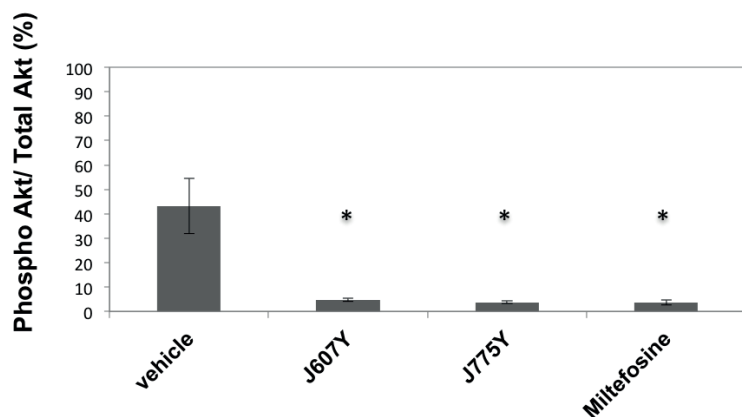

B.

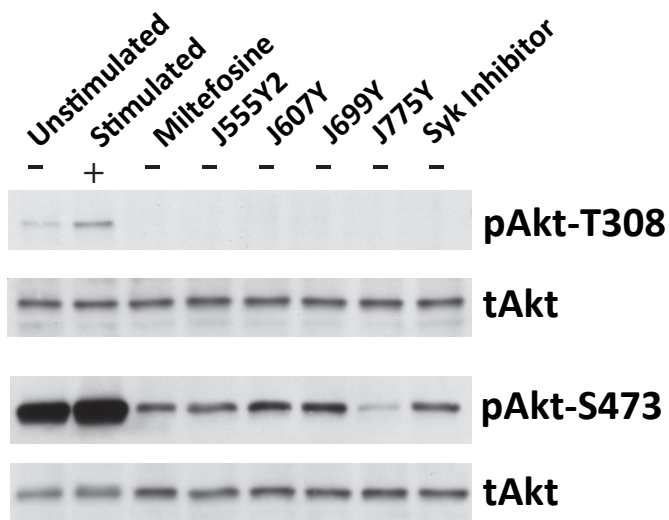

C.

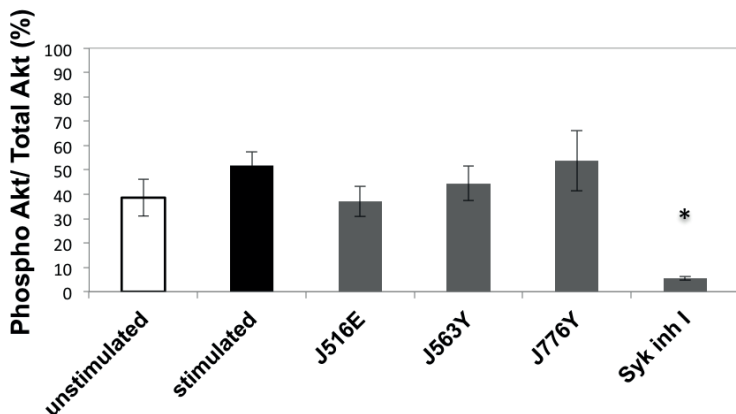

**Supplementary Table 1: Degranulation Assay Results and Safety Index Ranking**

| compound | % control | % inhibition | at conc (µM) |
|----------|-----------|--------------|--------------|
| J702Y    | -1.8      | 101.8        | 25           |
| J584E    | 0.3       | 99.7         | 25           |
| J555Y    | 1.0       | 99.0         | 25           |
| J521Y    | 1.4       | 98.6         | 10           |
| J676Y    | 1.4       | 98.6         | 25           |
| J597E    | 1.4       | 98.6         | 25           |
| J539C    | 1.9       | 98.1         | 10           |
| J589E    | 2.0       | 98.0         | 25           |
| J608E    | 2.0       | 98.0         | 25           |
| J647E    | 2.1       | 97.9         | 25           |
| J682Y    | 2.7       | 97.3         | 25           |
| J694Y    | 2.9       | 97.1         | 25           |
| J667Y    | 3.1       | 96.9         | 25           |
| J678Y    | 3.1       | 96.9         | 25           |
| J689Y    | 3.4       | 96.6         | 25           |
| J664Y    | 3.4       | 96.6         | 25           |
| J595E    | 4.0       | 96.0         | 10           |
| J475E    | 4.0       | 96.0         | 25           |
| J438Y    | 4.2       | 95.8         | 15           |
| J509Y    | 4.3       | 95.7         | 25           |
| J671Y    | 4.7       | 95.3         | 25           |
| J530Y    | 4.7       | 95.3         | 10           |
| J505Y    | 4.9       | 95.1         | 25           |
| J507Y    | 4.9       | 95.1         | 25           |
| J491C    | 4.9       | 95.1         | 25           |
| J532Y    | 5.0       | 95.0         | 25           |
| J607Y    | 5.0       | 95.0         | 25           |
| J541E    | 5.2       | 94.8         | 25           |
| J534E    | 5.3       | 94.7         | 10           |
| IBS-87   | 5.4       | 94.6         | 25           |
| J655Y    | 5.5       | 94.5         | 25           |
| J656Y    | 5.5       | 94.5         | 25           |
| J500E    | 5.9       | 94.1         | 25           |
| J511Y    | 6.2       | 93.8         | 25           |
| J599E    | 6.3       | 93.7         | 25           |
| J546Y    | 7.0       | 93.0         | 10           |
| J623E    | 7.0       | 93.0         | 25           |
| J520Y    | 7.1       | 92.9         | 25           |
| J453E    | 7.2       | 92.8         | 25           |
| J660Y    | 7.2       | 92.8         | 25           |
| J573Y    | 7.5       | 92.5         | 25           |
| J670Y    | 7.8       | 92.2         | 25           |
| J553E    | 7.9       | 92.1         | 25           |
| J674Y    | 8.2       | 91.8         | 25           |
| J683Y    | 8.6       | 91.4         | 25           |
| J673Y    | 9.2       | 90.8         | 25           |
| J557E    | 9.2       | 90.8         | 25           |
| J680Y    | 9.3       | 90.7         | 25           |
| IBS-11   | 9.4       | 90.6         | 25           |
| J590Y    | 10.0      | 90.0         | 25           |
| J663Y    | 10.0      | 90.0         | 25           |
| J620Y    | 11.0      | 89.0         | 25           |
| J626Y    | 11.0      | 89.0         | 25           |

|             |      |      |    |
|-------------|------|------|----|
| J524Y       | 11.1 | 88.9 | 25 |
| J693Y       | 11.4 | 88.6 | 25 |
| J699Y       | 11.5 | 88.5 | 25 |
| J550E       | 11.9 | 88.1 | 10 |
| J567E       | 12.0 | 88.0 | 25 |
| J575Y       | 12.0 | 88.0 | 25 |
| J614Y       | 12.0 | 88.0 | 25 |
| J637Y       | 12.0 | 88.0 | 25 |
| J528E       | 12.1 | 87.9 | 25 |
| J576E       | 12.3 | 87.7 | 10 |
| J549E       | 12.3 | 87.7 | 10 |
| J649Y       | 12.5 | 87.5 | 25 |
| J473C       | 12.7 | 87.3 | 25 |
| J545E       | 12.9 | 87.1 | 10 |
| J533Y       | 13.0 | 87.0 | 10 |
| J554Y       | 13.0 | 87.0 | 25 |
| J677Y       | 13.1 | 86.9 | 25 |
| Miltefosine | 13.2 | 86.8 | 10 |
| J653Y       | 13.3 | 86.7 | 25 |
| J688Y       | 13.4 | 86.6 | 25 |
| J514E       | 13.5 | 86.5 | 25 |
| J686Y       | 14.0 | 86.0 | 25 |
| J606E       | 14.0 | 86.0 | 25 |
| J619Y       | 14.0 | 86.0 | 25 |
| J625E       | 14.0 | 86.0 | 25 |
| J714Y       | 14.5 | 85.5 | 25 |
| IBS-16      | 14.6 | 85.4 | 25 |
| J661Y       | 14.8 | 85.2 | 25 |
| J588Y       | 15.0 | 85.0 | 10 |
| J629E       | 15.0 | 85.0 | 25 |
| J692Y       | 15.0 | 85.0 | 25 |
| J525E       | 15.1 | 84.9 | 25 |
| J448E       | 15.3 | 84.7 | 25 |
| J551E       | 15.4 | 84.6 | 10 |
| J566E       | 15.4 | 84.6 | 10 |
| J668Y       | 15.8 | 84.2 | 25 |
| J583E       | 16.0 | 84.0 | 10 |
| J601Y       | 16.0 | 84.0 | 25 |
| J627E       | 16.0 | 84.0 | 25 |
| J687Y       | 16.0 | 84.0 | 25 |
| J598E       | 16.2 | 83.8 | 25 |
| J697Y       | 16.4 | 83.6 | 25 |
| J585Y       | 16.5 | 83.5 | 25 |
| J538E       | 16.5 | 83.5 | 25 |
| J684Y       | 16.8 | 83.2 | 25 |
| J600E       | 16.9 | 83.1 | 25 |
| J622Y       | 17.0 | 83.0 | 25 |
| J444C       | 17.4 | 82.6 | 25 |
| J577E       | 17.4 | 82.6 | 10 |
| J479Y       | 17.5 | 82.5 | 25 |
| J645E       | 18.0 | 82.0 | 25 |
| J666Y       | 18.1 | 81.9 | 25 |
| J547E       | 18.1 | 81.9 | 10 |
| J578Y       | 18.5 | 81.5 | 10 |
| J610Y       | 19.0 | 81.0 | 25 |
| J644Y       | 19.0 | 81.0 | 25 |

|         |      |      |    |
|---------|------|------|----|
| J669Y   | 19.3 | 80.7 | 25 |
| J651E   | 19.9 | 80.1 | 25 |
| J556Y   | 20.0 | 80.0 | 25 |
| J609E   | 20.0 | 80.0 | 25 |
| J616E   | 20.0 | 80.0 | 25 |
| J707Y   | 20.2 | 79.8 | 25 |
| J665Y   | 20.2 | 79.8 | 25 |
| J681Y   | 20.3 | 79.7 | 25 |
| IBS-68  | 20.7 | 79.3 | 25 |
| J488Y   | 21.0 | 79.0 | 25 |
| J635E   | 21.0 | 79.0 | 25 |
| J720Y   | 21.1 | 78.9 | 25 |
| J429E   | 21.2 | 78.8 | 25 |
| J657E   | 22.8 | 77.2 | 25 |
| J632E   | 23.0 | 77.0 | 25 |
| IBS-63  | 23.5 | 76.5 | 25 |
| J612C   | 24.0 | 76.0 | 25 |
| J703Y   | 24.5 | 75.5 | 25 |
| J558E   | 24.9 | 75.1 | 25 |
| J634E   | 25.0 | 75.0 | 25 |
| J522E   | 25.8 | 74.2 | 25 |
| J543Y   | 26.0 | 74.0 | 25 |
| J480Y   | 26.3 | 73.7 | 25 |
| J548Y   | 26.5 | 73.5 | 25 |
| J604E   | 26.5 | 73.5 | 25 |
| J569E   | 26.6 | 73.4 | 10 |
| J594E   | 28.3 | 71.7 | 25 |
| IBS-64  | 28.4 | 71.6 | 25 |
| J675Y   | 28.5 | 71.5 | 25 |
| J621E   | 29.0 | 71.0 | 25 |
| J711Y   | 29.3 | 70.7 | 25 |
| J658E   | 29.5 | 70.5 | 25 |
| J477C   | 29.8 | 70.2 | 25 |
| J679Y   | 29.9 | 70.1 | 25 |
| J455Y   | 30.4 | 69.6 | 25 |
| J552E   | 31.9 | 68.1 | 25 |
| J709Y   | 32.7 | 67.3 | 25 |
| IBS-41  | 33.8 | 66.2 | 25 |
| J484C   | 34.0 | 66.0 | 25 |
| IBS-15  | 34.0 | 66.0 | 25 |
| J469Y   | 35.0 | 65.0 | 25 |
| IBS-105 | 35.3 | 64.7 | 25 |
| J698Y   | 36.1 | 63.9 | 25 |
| J690C   | 36.1 | 63.9 | 25 |
| J615E   | 37.0 | 63.0 | 25 |
| J624E   | 37.0 | 63.0 | 25 |
| J672Y   | 37.3 | 62.7 | 25 |
| J712Y   | 38.2 | 61.8 | 25 |
| J628E   | 39.0 | 61.0 | 25 |
| J646E   | 39.2 | 60.8 | 25 |
| J706Y   | 39.3 | 60.7 | 25 |
| J718Y   | 40.2 | 59.8 | 25 |
| J633E   | 41.0 | 59.0 | 25 |
| J700E   | 41.7 | 58.3 | 25 |
| IBS-44  | 45.2 | 54.8 | 25 |
| J705Y   | 46.7 | 53.3 | 25 |

|         |      |      |    |
|---------|------|------|----|
| IBS-65  | 48.5 | 51.5 | 25 |
| J654Y   | 49.2 | 50.8 | 25 |
| J704Y   | 50.8 | 49.2 | 25 |
| IBS-23  | 51.9 | 48.1 | 25 |
| IBS-83  | 52.1 | 47.9 | 25 |
| J497Y   | 53.0 | 47.0 | 25 |
| J586E   | 53.7 | 46.3 | 25 |
| J462E   | 54.0 | 46.0 | 25 |
| J419E   | 57.9 | 42.1 | 25 |
| J562Y   | 60.3 | 39.7 | 25 |
| J431Y   | 63.0 | 37.0 | 25 |
| J485E   | 63.0 | 37.0 | 25 |
| IBS-101 | 63.5 | 36.5 | 25 |
| J602E   | 64.9 | 35.1 | 25 |
| IBS-104 | 65.6 | 34.4 | 25 |
| J715Y   | 65.8 | 34.2 | 25 |
| J640E   | 66.1 | 33.9 | 25 |
| J540C   | 66.5 | 33.5 | 25 |
| J641E   | 67.0 | 33.0 | 25 |
| J710Y   | 67.3 | 32.7 | 25 |
| J568E   | 67.7 | 32.3 | 25 |
| KA-4    | 67.8 | 32.2 | 25 |
| J713Y   | 67.9 | 32.1 | 25 |
| IBS-42  | 68.0 | 32.0 | 25 |
| J518Y   | 68.4 | 31.6 | 25 |
| J443E   | 69.0 | 31.0 | 25 |
| J460Y   | 69.0 | 31.0 | 25 |
| J708Y   | 70.4 | 29.6 | 25 |
| J648E   | 70.7 | 29.3 | 25 |
| IBS-66  | 70.7 | 29.3 | 25 |
| J478C   | 71.0 | 29.0 | 25 |
| J636Y   | 72.0 | 28.0 | 25 |
| J652E   | 72.9 | 27.1 | 25 |
| J529E   | 73.0 | 27.0 | 25 |
| J603E   | 73.2 | 26.8 | 25 |
| J537E   | 73.3 | 26.7 | 25 |
| J685Y   | 73.4 | 26.6 | 25 |
| J592C   | 74.2 | 25.8 | 25 |
| J476S   | 76.0 | 24.0 | 25 |
| J719Y   | 76.3 | 23.7 | 25 |
| J650Y   | 76.3 | 23.7 | 25 |
| KA-5    | 76.8 | 23.2 | 25 |
| J519Y   | 77.3 | 22.7 | 25 |
| KA-3    | 77.5 | 22.5 | 25 |
| KA-2    | 78.2 | 21.8 | 25 |
| J542E   | 79.0 | 21.0 | 25 |
| IBS-46  | 79.5 | 20.5 | 25 |
| J696Y   | 79.7 | 20.3 | 25 |
| J531Y   | 80.7 | 19.3 | 25 |
| KA-52   | 81.7 | 18.3 | 25 |
| J605Y   | 83.5 | 16.5 | 25 |
| J563Y   | 84.3 | 15.7 | 25 |
| IBS-17  | 84.5 | 15.5 | 25 |
| J482C   | 85.0 | 15.0 | 25 |
| IBS-24  | 85.4 | 14.6 | 25 |
| KA-10   | 85.9 | 14.1 | 25 |

|         |      |      |     |
|---------|------|------|-----|
| J405S   | 85.9 | 14.1 | 25  |
| J565Y   | 86.0 | 14.0 | 25  |
| J461Y   | 87.0 | 13.0 | 25  |
| J506Y   | 87.0 | 13.0 | 25  |
| IBS-45  | 87.1 | 12.9 | 25  |
| IBS-20  | 87.1 | 12.9 | 25  |
| IBS-97  | 87.6 | 12.4 | 25  |
| J593C   | 87.8 | 12.2 | 25  |
| J494E   | 88.6 | 11.4 | 25  |
| KA-7    | 89.4 | 10.6 | 25  |
| J662C   | 89.5 | 10.5 | 25  |
| IBS-35  | 89.5 | 10.5 | 25  |
| IBS-50  | 89.5 | 10.5 | 25  |
| IBS-56  | 89.7 | 10.3 | 25  |
| J570E   | 90.0 | 10.0 | 25  |
| IBS-79  | 90.1 | 9.9  | 25  |
| KA-38   | 90.2 | 9.8  | 25  |
| IBS-96  | 90.2 | 9.8  | 25  |
| J643Y   | 90.7 | 9.3  | 25  |
| IBS-43  | 90.7 | 9.3  | 25  |
| J596C   | 90.9 | 9.1  | 25  |
| J495Y   | 90.9 | 9.1  | 25  |
| KA-53   | 90.9 | 9.1  | 25  |
| J572E   | 91.0 | 9.0  | 25  |
| J571E   | 91.1 | 8.9  | 25  |
| IBS-98  | 91.1 | 8.9  | 25  |
| IBS-106 | 91.5 | 8.5  | 25  |
| J510Y   | 91.7 | 8.3  | 25  |
| J428E   | 91.9 | 8.1  | 25  |
| J508Y   | 92.5 | 7.5  | 25  |
| KA-33   | 92.6 | 7.4  | 25  |
| KA-6    | 92.7 | 7.3  | 25  |
| KA-9    | 93.0 | 7.0  | 25  |
| KA-32   | 93.2 | 6.8  | 25  |
| KA-23   | 93.5 | 6.5  | 25  |
| KA-31   | 93.5 | 6.5  | 25  |
| KA-22   | 93.7 | 6.3  | 25  |
| IBS-36  | 94.0 | 6.0  | 25  |
| IBS-85  | 94.4 | 5.6  | 25  |
| J580Y   | 94.4 | 5.6  | 25  |
| J454E   | 95.0 | 5.0  | 25  |
| J489Y   | 95.0 | 5.0  | 25  |
| IBS-30  | 95.1 | 4.9  | 25  |
| J611Y   | 95.1 | 4.9  | 25  |
| J613C   | 95.2 | 4.8  | 25  |
| KA-12   | 95.4 | 4.6  | 25  |
| J659Y   | 95.5 | 4.5  | 25  |
| IBS-58  | 95.9 | 4.1  | 25  |
| J617E   | 96.0 | 4.0  | 25  |
| J503E   | 96.0 | 4.0  | 100 |
| J501E   | 96.3 | 3.7  | 100 |
| KA-50   | 96.9 | 3.1  | 25  |
| KA-37   | 96.9 | 3.1  | 25  |
| J439S   | 96.9 | 3.1  | 25  |
| KA-27   | 97.0 | 3.0  | 25  |
| IBS-21  | 97.8 | 2.2  | 25  |



|         |       |       |     |
|---------|-------|-------|-----|
| IBS-2   | 97.8  | 2.2   | 25  |
| J449E   | 98.0  | 2.0   | 25  |
| IBS-103 | 98.1  | 1.9   | 25  |
| J582C   | 98.3  | 1.7   | 25  |
| J447C   | 98.6  | 1.4   | 25  |
| J430S   | 99.2  | 0.8   | 25  |
| J536Y   | 99.4  | 0.6   | 25  |
| J502E   | 99.4  | 0.6   | 100 |
| J564Y   | 99.5  | 0.5   | 25  |
| KA-30   | 99.8  | 0.2   | 25  |
| J631Y   | 100.0 | 0.0   | 25  |
| J559S   | 100.3 | -0.3  | 25  |
| IBS-102 | 100.7 | -0.7  | 25  |
| J486Y   | 101.0 | -1.0  | 25  |
| KA-36   | 101.2 | -1.2  | 25  |
| J437Y   | 101.4 | -1.4  | 25  |
| J561Y   | 101.7 | -1.7  | 25  |
| IBS-49  | 102.0 | -2.0  | 25  |
| IBS-100 | 102.7 | -2.7  | 25  |
| KA-14   | 102.7 | -2.7  | 25  |
| KA-25   | 103.0 | -3.0  | 25  |
| J560S   | 103.1 | -3.1  | 25  |
| J639E   | 103.3 | -3.3  | 25  |
| KA-34   | 103.7 | -3.7  | 25  |
| IBS-33  | 103.7 | -3.7  | 25  |
| KA-29   | 104.2 | -4.2  | 25  |
| J515Y   | 104.3 | -4.3  | 25  |
| IBS-47  | 104.8 | -4.8  | 25  |
| J513E   | 105.5 | -5.5  | 25  |
| J591E   | 105.6 | -5.6  | 25  |
| KA-26   | 106.0 | -6.0  | 25  |
| IBS-34  | 107.7 | -7.7  | 25  |
| KA-28   | 108.8 | -8.8  | 25  |
| KA-17   | 108.8 | -8.8  | 25  |
| J459Y   | 109.0 | -9.0  | 25  |
| IBS-95  | 109.1 | -9.1  | 25  |
| KA-13   | 109.2 | -9.2  | 25  |
| J523E   | 110.5 | -10.5 | 25  |
| KA-24   | 112.0 | -12.0 | 25  |
| KA-42   | 114.8 | -14.8 | 25  |
| J483C   | 115.0 | -15.0 | 25  |
| IBS-107 | 132.1 | -32.1 | 25  |

**Safety Index Ranking****JADO Compound****Index****Rank**

|        |      |    |
|--------|------|----|
| J683Y  | 64.5 | 1  |
| J656Y  | 62.5 | 2  |
| J660Y  | 62.5 | 2  |
| J661Y  | 57.1 | 4  |
| J663Y  | 55.6 | 5  |
| J668Y  | 51.3 | 6  |
| J554Y  | 48.8 | 7  |
| J626Y  | 48.8 | 7  |
| J699Y  | 48.8 | 7  |
| J677Y  | 46.5 | 10 |
| J665Y  | 44.4 | 11 |
| J673Y  | 42.6 | 12 |
| J694Y  | 40.5 | 13 |
| IBS-87 | 40   | 14 |
| J607Y  | 39.5 | 15 |
| J681Y  | 37.7 | 16 |
| J669Y  | 37.5 | 17 |
| J680Y  | 37.5 | 17 |
| J674Y  | 37   | 19 |
| J692Y  | 32.8 | 20 |
| J671Y  | 32.2 | 21 |
| J555Y  | 31.3 | 22 |
| J620Y  | 29.9 | 23 |
| J684Y  | 29.9 | 23 |
| J697Y  | 29.9 | 23 |
| J693Y  | 25.6 | 26 |
| J707Y  | 25   | 27 |
| J689Y  | 24.6 | 28 |
| J688Y  | 23.8 | 29 |
| J714Y  | 22.7 | 30 |
| J533Y  | 22.2 | 31 |
| J687Y  | 22.2 | 31 |
| J670Y  | 22.1 | 33 |
| J678Y  | 21.3 | 34 |
| J666Y  | 20.8 | 35 |
| J473C  | 19.8 | 36 |
| J644Y  | 16.5 | 37 |
| J702Y  | 16.1 | 38 |
| J682Y  | 15.6 | 39 |
| J573Y  | 14.7 | 40 |
| J667Y  | 14.3 | 41 |
| J676Y  | 14.3 | 41 |
| J530Y  | 13.5 | 43 |
| J664Y  | 13.2 | 44 |
| J545E  | 12.5 | 45 |
| J589E  | 12.5 | 45 |
| J600E  | 11.6 | 47 |
| J647E  | 11.6 | 47 |
| J550E  | 11.4 | 49 |
| J629E  | 11.4 | 49 |
| J655Y  | 10.9 | 51 |
| J551E  | 10.6 | 52 |
| J584E  | 10.4 | 53 |

|        |      |     |
|--------|------|-----|
| J703Y  | 10.2 | 54  |
| J651E  | 10   | 55  |
| J775Y  | 9.9  | 56  |
| J538E  | 9.8  | 57  |
| J525E  | 9.7  | 58  |
| J625E  | 9.6  | 59  |
| J479Y  | 9.2  | 60  |
| IBS-68 | 8.9  | 61  |
| J475E  | 8.8  | 62  |
| J539C  | 8.6  | 63  |
| J653Y  | 8.2  | 64  |
| J614Y  | 8.1  | 65  |
| J594E  | 7.9  | 66  |
| J610Y  | 7.8  | 67  |
| J645E  | 7.7  | 68  |
| J438Y  | 7.4  | 69  |
| J477C  | 7.4  | 69  |
| J524Y  | 7.2  | 71  |
| J488Y  | 7.1  | 72  |
| J558E  | 7.1  | 72  |
| J595E  | 7.1  | 72  |
| J505Y  | 7    | 75  |
| J556Y  | 7    | 75  |
| J588Y  | 6.9  | 77  |
| J480Y  | 6.8  | 78  |
| J511Y  | 6.8  | 78  |
| J720Y  | 6.8  | 78  |
| J532Y  | 6.6  | 81  |
| J521Y  | 6.4  | 82  |
| J575Y  | 6.4  | 82  |
| J576E  | 6.3  | 84  |
| J507Y  | 6    | 85  |
| J541E  | 6    | 85  |
| J590Y  | 6    | 85  |
| J608E  | 6    | 85  |
| J686Y  | 6    | 85  |
| J509Y  | 5.9  | 90  |
| J528E  | 5.8  | 91  |
| J601Y  | 5.8  | 91  |
| J534E  | 5.7  | 93  |
| J549E  | 5.7  | 93  |
| J557E  | 5.7  | 93  |
| J627E  | 5.7  | 93  |
| J420E  | 5.4  | 97  |
| J491C  | 5.4  | 97  |
| J623E  | 5.4  | 97  |
| J649Y  | 5.4  | 97  |
| J444C  | 5.3  | 101 |
| J520Y  | 5.3  | 101 |
| J567E  | 5.3  | 101 |
| J546Y  | 5.2  | 104 |
| J597E  | 5.2  | 104 |
| J616E  | 5.2  | 104 |
| J577E  | 5.1  | 107 |
| J578Y  | 5.1  | 107 |

|        |     |      |
|--------|-----|------|
| J583E  | 5.1 | 107  |
| J598E  | 5   | 110  |
| J637Y  | 4.7 | 111  |
| J500E  | 4.5 | 112  |
| J619Y  | 4.5 | 112  |
| J547E  | 4.4 | 114  |
| J453E  | 4.3 | 115  |
| J634E  | 4   | 116  |
| J622Y  | 3.9 | 117  |
| J514E  | 3.8 | 118  |
| J599E  | 3.8 | 118  |
| J657E  | 3.8 | 118  |
| J609E  | 3.4 | 121  |
| IBS-11 | 3.3 | 122  |
| J553E  | 3.2 | 123  |
| J566E  | 3.2 | 123  |
| J448E  | 2.8 | 125  |
| J606E  | 2.6 | 126  |
| J635E  | 2.3 | 127  |
| J585Y  | 2.1 | 128  |
| J429E  | 2   | 129  |
| J612Y  | 2   | 129  |
| J632E  | 0.9 | 131  |
| J428E  |     | #N/A |
| J430E  |     | #N/A |
| J431Y  |     | #N/A |
| J437Y  |     | #N/A |
| J439S  |     | #N/A |
| J443E  |     | #N/A |
| J447C  |     | #N/A |
| J449E  |     | #N/A |
| J454E  |     | #N/A |
| J455Y  |     | #N/A |
| J459Y  |     | #N/A |
| J460Y  |     | #N/A |
| J461Y  |     | #N/A |
| J462E  |     | #N/A |
| J469Y  |     | #N/A |
| J476S  |     | #N/A |
| J478C  |     | #N/A |
| J482C  |     | #N/A |
| J483C  |     | #N/A |
| J484C  |     | #N/A |
| J485E  |     | #N/A |
| J486Y  |     | #N/A |
| J489Y  |     | #N/A |
| J494E  |     | #N/A |
| J495Y  |     | #N/A |
| J497Y  |     | #N/A |
| J501E  |     | #N/A |
| J502E  |     | #N/A |
| J503E  |     | #N/A |
| J506Y  |     | #N/A |
| J508Y  |     | #N/A |
| J510Y  |     | #N/A |

|       |      |
|-------|------|
| J513E | #N/A |
| J515Y | #N/A |
| J518Y | #N/A |
| J519Y | #N/A |
| J522E | #N/A |
| J523E | #N/A |
| J529E | #N/A |
| J531Y | #N/A |
| J536Y | #N/A |
| J537E | #N/A |
| J540C | #N/A |
| J542E | #N/A |
| J543Y | #N/A |
| J548Y | #N/A |
| J552E | #N/A |
| J559S | #N/A |
| J560S | #N/A |
| J561Y | #N/A |
| J562Y | #N/A |
| J563Y | #N/A |
| J564Y | #N/A |
| J565Y | #N/A |
| J568E | #N/A |
| J569E | #N/A |
| J570E | #N/A |
| J571E | #N/A |
| J572E | #N/A |
| J580Y | #N/A |
| J582C | #N/A |
| J586E | #N/A |
| J591E | #N/A |
| J592C | #N/A |
| J593C | #N/A |
| J596C | #N/A |
| J602E | #N/A |
| J603E | #N/A |
| J604E | #N/A |
| J605Y | #N/A |
| J611Y | #N/A |
| J613C | #N/A |
| J615E | #N/A |
| J617E | #N/A |
| J621E | #N/A |
| J624E | #N/A |
| J628E | #N/A |
| J631Y | #N/A |
| J633E | #N/A |
| J636Y | #N/A |
| J639E | #N/A |
| J640E | #N/A |
| J641E | #N/A |
| J643Y | #N/A |
| J646E | #N/A |
| J648E | #N/A |
| J650Y | #N/A |

|        |      |
|--------|------|
| J652E  | #N/A |
| J654Y  | #N/A |
| J658E  | #N/A |
| J659Y  | #N/A |
| J662C  | #N/A |
| J672Y  | #N/A |
| J675Y  | #N/A |
| J679Y  | #N/A |
| J685Y  | #N/A |
| J690C  | #N/A |
| J696Y  | #N/A |
| J698Y  | #N/A |
| J700E  | #N/A |
| J704Y  | #N/A |
| J705Y  | #N/A |
| J706Y  | #N/A |
| J708Y  | #N/A |
| J709Y  | #N/A |
| J710Y  | #N/A |
| J711Y  | #N/A |
| J712Y  | #N/A |
| J713Y  | #N/A |
| J715Y  | #N/A |
| J718Y  | #N/A |
| J719Y  | #N/A |
| IBS-2  | #N/A |
| IBS-15 | #N/A |
| IBS-16 | #N/A |
| IBS-17 | #N/A |
| IBS-20 | #N/A |
| IBS-21 | #N/A |
| IBS-23 | #N/A |
| IBS-24 | #N/A |
| IBS-30 | #N/A |
| IBS-33 | #N/A |
| IBS-34 | #N/A |
| IBS-35 | #N/A |
| IBS-36 | #N/A |
| IBS-41 | #N/A |
| IBS-42 | #N/A |
| IBS-43 | #N/A |
| IBS-44 | #N/A |
| IBS-45 | #N/A |
| IBS-46 | #N/A |
| IBS-47 | #N/A |
| IBS-49 | #N/A |
| IBS-50 | #N/A |
| IBS-56 | #N/A |
| IBS-58 | #N/A |
| IBS-63 | #N/A |
| IBS-64 | #N/A |
| IBS-65 | #N/A |
| IBS-66 | #N/A |
| IBS-79 | #N/A |
| IBS-83 | #N/A |

|         |      |
|---------|------|
| IBS-85  | #N/A |
| IBS-95  | #N/A |
| IBS-96  | #N/A |
| IBS-97  | #N/A |
| IBS-98  | #N/A |
| IBS-100 | #N/A |
| IBS-101 | #N/A |
| IBS-102 | #N/A |
| IBS-103 | #N/A |
| IBS-104 | #N/A |
| IBS-105 | #N/A |
| IBS-106 | #N/A |
| IBS-107 | #N/A |
| KA-2    | #N/A |
| KA-3    | #N/A |
| KA-4    | #N/A |
| KA-5    | #N/A |
| KA-6    | #N/A |
| KA-7    | #N/A |
| KA-9    | #N/A |
| KA-10   | #N/A |
| KA-12   | #N/A |
| KA-13   | #N/A |
| KA-14   | #N/A |
| KA-17   | #N/A |
| KA-22   | #N/A |
| KA-23   | #N/A |
| KA-24   | #N/A |
| KA-25   | #N/A |
| KA-26   | #N/A |
| KA-27   | #N/A |
| KA-28   | #N/A |
| KA-29   | #N/A |
| KA-30   | #N/A |
| KA-31   | #N/A |
| KA-32   | #N/A |
| KA-33   | #N/A |
| KA-34   | #N/A |
| KA-36   | #N/A |
| KA-37   | #N/A |
| KA-38   | #N/A |
| KA-42   | #N/A |
| KA-50   | #N/A |
| KA-52   | #N/A |
| KA-53   | #N/A |
| J405S   |      |
| J419E   |      |

## Supplementary Table 2: Endocytic Parameters

\*bold indicates the parameters in figure 2

|         |                                                                                                                                                                                                                                                                                                                                                                                                                                                                                                                                                                                                                                                                                                                                                                                                                                                                                                                                                                                                                                                                                                                                                                                                   |
|---------|---------------------------------------------------------------------------------------------------------------------------------------------------------------------------------------------------------------------------------------------------------------------------------------------------------------------------------------------------------------------------------------------------------------------------------------------------------------------------------------------------------------------------------------------------------------------------------------------------------------------------------------------------------------------------------------------------------------------------------------------------------------------------------------------------------------------------------------------------------------------------------------------------------------------------------------------------------------------------------------------------------------------------------------------------------------------------------------------------------------------------------------------------------------------------------------------------|
| EGF     | <ul style="list-style-type: none"> <li><b>1 Number of vesicles masked</b></li> <li>2 Total intensity masked</li> <li>3 Integral vesicle intensity masked</li> <li><b>4 Mode area (volume weighted)</b></li> <li><b>5 Mode area (mean intensity weighted)</b></li> <li><b>6 Mode area</b></li> <li><b>7 Mode mean intensity (volume weighted)</b></li> <li><b>8 Mode mean intensity (mean intensity weighted)</b></li> <li><b>9 Mode mean intensity</b></li> <li><b>10 Mode integral intensity (volume weighted)</b></li> <li><b>11 Mode integral intensity (mean intensity weighted)</b></li> <li><b>12 Mode integral intensity</b></li> <li><b>13 Distance to nucleus distance ratio (volume weighted)</b></li> <li><b>14 Distance to nucleus distance ratio (mean intensity weighted)</b></li> <li><b>15 Distance to nucleus distance ratio</b></li> <li>16 Membrane-nucleus distribution ratio (volume weighted)</li> <li>17 Membrane-nucleus distribution ratio (mean intensity weighted)</li> <li>18 Membrane-nucleus distribution ratio (volume weighted)</li> <li>19 Mode vesicle intensity inside cell protrusions</li> <li>20 Mode vesicle intensity outside cell protrusions</li> </ul> |
| TF      | <ul style="list-style-type: none"> <li><b>1 Number of vesicles masked</b></li> <li>2 Total intensity masked</li> <li>3 Integral vesicle intensity masked</li> <li><b>4 Mode area (volume weighted)</b></li> <li><b>5 Mode area (mean intensity weighted)</b></li> <li><b>6 Mode area</b></li> <li><b>7 Mode mean intensity (volume weighted)</b></li> <li><b>8 Mode mean intensity (mean intensity weighted)</b></li> <li><b>9 Mode mean intensity</b></li> <li><b>10 Mode integral intensity (volume weighted)</b></li> <li><b>11 Mode integral intensity (mean intensity weighted)</b></li> <li><b>12 Mode integral intensity</b></li> <li><b>13 Distance to nucleus distance ratio (volume weighted)</b></li> <li><b>14 Distance to nucleus distance ratio (mean intensity weighted)</b></li> <li><b>15 Distance to nucleus distance ratio</b></li> <li>16 Membrane-nucleus distribution ratio (volume weighted)</li> <li>17 Membrane-nucleus distribution ratio (mean intensity weighted)</li> <li>18 Membrane-nucleus distribution ratio (volume weighted)</li> <li>19 Mode vesicle intensity inside cell protrusions</li> <li>20 Mode vesicle intensity outside cell protrusions</li> </ul> |
| EGF/ TF | <ul style="list-style-type: none"> <li><b>TF/ EGF co-localization</b></li> <li><b>EGF/ TF co-localization</b></li> </ul>                                                                                                                                                                                                                                                                                                                                                                                                                                                                                                                                                                                                                                                                                                                                                                                                                                                                                                                                                                                                                                                                          |
| CELL    | <ul style="list-style-type: none"> <li>1 Cell median area</li> <li>2 Cell median compactness</li> <li>4 Cell median contact-ratio</li> <li>5 Cell median dispersion</li> <li>6 Cell median eccentricity</li> <li>7 Cell median protrusion area</li> <li>8 Cell median solidity</li> <li>9 Median nuclei-cell ratio</li> <li>10 Nuclei median compactness</li> <li>11 Nuclei mode area</li> </ul>                                                                                                                                                                                                                                                                                                                                                                                                                                                                                                                                                                                                                                                                                                                                                                                                  |



**Supplementary Table 3: Endocytic Profiles (compounds with parameters in bold are endocytic hits)**

|             | EGF number of vesicle masked | EGF mode Area (volume weighted) | EGF mode Area (mean int. weighted) | EGF mode Area | EGF mode Mean Intensity (volume weighted) | EGF mode Mean Intensity (mean int. weighted) |
|-------------|------------------------------|---------------------------------|------------------------------------|---------------|-------------------------------------------|----------------------------------------------|
| Ag1478_10   | 2.277                        | 4.573                           | 7.175                              | 2.762         | -2.824                                    | -2.556                                       |
| Dmso 0.1%   | -0.194                       | -0.423                          | -0.733                             | -0.509        | 0.000                                     | 0.059                                        |
| Miltefosine | <b>0.357</b>                 | <b>-0.299</b>                   | <b>-0.129</b>                      | <b>-0.271</b> | <b>2.112</b>                              | <b>1.286</b>                                 |
| IBS-100     | 0.188                        | -0.138                          | 0.298                              | -0.037        | 0.254                                     | 0.368                                        |
| IBS-101     | 0.698                        | -0.671                          | -0.200                             | -0.481        | 1.561                                     | 1.262                                        |
| IBS-102     | 0.391                        | -0.509                          | 0.142                              | 0.045         | 1.380                                     | 1.319                                        |
| IBS-103     | 0.993                        | -0.133                          | 0.129                              | 0.356         | 0.612                                     | 0.676                                        |
| IBS-104     | 0.830                        | 0.110                           | 0.426                              | 0.042         | 1.902                                     | 1.550                                        |
| IBS-105     | 0.548                        | 0.436                           | 1.068                              | 0.631         | 0.088                                     | 0.300                                        |
| IBS-106     | <b>0.660</b>                 | <b>0.439</b>                    | <b>1.020</b>                       | <b>0.375</b>  | <b>0.762</b>                              | <b>0.794</b>                                 |
| IBS-107     | <b>0.225</b>                 | <b>-1.359</b>                   | <b>-0.440</b>                      | <b>-0.473</b> | <b>1.318</b>                              | <b>1.237</b>                                 |
| IBS-11      | -0.585                       | 0.579                           | 0.048                              | 0.000         | -0.296                                    | -0.257                                       |
| IBS-15      | -1.239                       | 0.140                           | -0.017                             | 0.040         | -0.780                                    | -0.728                                       |
| IBS-16      | 0.260                        | -0.478                          | -0.809                             | -0.450        | -0.177                                    | 0.046                                        |
| IBS-17      | <b>-1.360</b>                | <b>2.574</b>                    | <b>3.290</b>                       | <b>2.408</b>  | <b>-1.227</b>                             | <b>-1.015</b>                                |
| IBS-2       | 0.013                        | -0.616                          | -0.225                             | -0.153        | 0.503                                     | 0.720                                        |
| IBS-20      | 0.567                        | -0.373                          | -0.135                             | -0.284        | -0.102                                    | 0.289                                        |
| IBS-21      | -0.166                       | 0.077                           | -0.077                             | -0.107        | 0.070                                     | 0.154                                        |
| IBS-23      | 0.613                        | -0.902                          | -0.509                             | -0.633        | 0.396                                     | 0.383                                        |
| IBS-24      | 0.251                        | -0.198                          | -0.905                             | -0.388        | -0.241                                    | -0.131                                       |
| IBS-30      | 0.121                        | 0.439                           | -0.041                             | 0.025         | -0.224                                    | -0.058                                       |
| IBS-33      | -0.517                       | -0.303                          | 1.351                              | 0.399         | 0.866                                     | 0.883                                        |
| IBS-34      | <b>-1.141</b>                | <b>-0.220</b>                   | <b>-0.847</b>                      | <b>-0.497</b> | <b>-1.090</b>                             | <b>-0.770</b>                                |
| IBS-35      | <b>-1.557</b>                | <b>-0.198</b>                   | <b>0.246</b>                       | <b>0.124</b>  | <b>-0.434</b>                             | <b>-0.256</b>                                |
| IBS-36      | <b>-0.282</b>                | <b>-0.434</b>                   | <b>-0.555</b>                      | <b>-0.429</b> | <b>-0.766</b>                             | <b>-0.771</b>                                |
| IBS-41      | <b>0.113</b>                 | <b>-0.227</b>                   | <b>-0.210</b>                      | <b>-0.132</b> | <b>-0.343</b>                             | <b>0.084</b>                                 |
| IBS-42      | <b>-1.329</b>                | <b>0.626</b>                    | <b>0.384</b>                       | <b>0.352</b>  | <b>-0.744</b>                             | <b>-0.621</b>                                |
| IBS-43      | -1.043                       | 0.644                           | -0.065                             | 0.291         | -0.767                                    | -0.550                                       |
| IBS-44      | <b>-0.393</b>                | <b>0.196</b>                    | <b>-0.229</b>                      | <b>-0.536</b> | <b>-1.072</b>                             | <b>-0.932</b>                                |
| IBS-45      | <b>-0.254</b>                | <b>-0.706</b>                   | <b>-1.079</b>                      | <b>-0.608</b> | <b>0.438</b>                              | <b>0.597</b>                                 |
| IBS-46      | <b>0.321</b>                 | <b>-0.955</b>                   | <b>-1.227</b>                      | <b>-0.942</b> | <b>1.185</b>                              | <b>1.655</b>                                 |
| IBS-47      | <b>-1.753</b>                | <b>0.956</b>                    | <b>2.230</b>                       | <b>0.949</b>  | <b>-1.324</b>                             | <b>-1.082</b>                                |
| IBS-49      | <b>-0.962</b>                | <b>0.988</b>                    | <b>0.344</b>                       | <b>0.609</b>  | <b>-1.226</b>                             | <b>-1.023</b>                                |
| IBS-50      | -2.331                       | 1.410                           | 0.890                              | 0.895         | -1.385                                    | -1.083                                       |
| IBS-56      | -1.886                       | 1.938                           | 2.859                              | 1.570         | -1.471                                    | -1.319                                       |
| IBS-58      | <b>-0.681</b>                | <b>-0.352</b>                   | <b>0.576</b>                       | <b>0.110</b>  | <b>-0.205</b>                             | <b>0.045</b>                                 |
| IBS-63      | -0.851                       | -0.120                          | 0.443                              | 0.298         | -0.717                                    | -0.655                                       |
| IBS-64      | -0.567                       | -0.054                          | 0.752                              | -0.031        | 0.151                                     | 0.550                                        |
| IBS-65      | <b>-0.549</b>                | <b>-0.435</b>                   | <b>-0.767</b>                      | <b>-0.228</b> | <b>-0.029</b>                             | <b>0.073</b>                                 |
| IBS-66      | -0.226                       | 0.243                           | 0.380                              | 0.127         | 0.199                                     | 0.222                                        |
| IBS-68      | <b>1.924</b>                 | <b>-0.488</b>                   | <b>0.215</b>                       | <b>-0.389</b> | <b>2.229</b>                              | <b>1.616</b>                                 |
| IBS-79      | -0.337                       | -0.346                          | -0.012                             | -0.311        | 1.712                                     | 1.619                                        |
| IBS-83      | <b>-0.967</b>                | <b>0.505</b>                    | <b>0.891</b>                       | <b>0.333</b>  | <b>-1.214</b>                             | <b>-0.810</b>                                |
| IBS-85      | 0.439                        | -0.476                          | 0.324                              | -0.078        | 0.330                                     | 0.670                                        |
| IBS-87      | <b>2.565</b>                 | <b>-1.718</b>                   | <b>-1.064</b>                      | <b>-1.086</b> | <b>2.077</b>                              | <b>1.947</b>                                 |
| IBS-95      | <b>1.338</b>                 | <b>-1.367</b>                   | <b>-0.671</b>                      | <b>-0.961</b> | <b>1.864</b>                              | <b>1.660</b>                                 |

|        |               |               |               |               |               |               |
|--------|---------------|---------------|---------------|---------------|---------------|---------------|
| IBS-96 | 0.662         | -0.128        | -0.304        | -0.559        | 1.358         | 1.265         |
| IBS-97 | <b>1.010</b>  | <b>-1.353</b> | <b>-0.686</b> | <b>-0.872</b> | <b>2.296</b>  | <b>1.827</b>  |
| IBS-98 | 0.648         | -0.176        | 0.716         | 0.003         | 0.636         | 0.785         |
| J405S  | 0.747         | 0.346         | 0.609         | 0.681         | 0.736         | 0.585         |
| J419E  | <b>-0.818</b> | <b>2.881</b>  | <b>1.868</b>  | <b>2.352</b>  | <b>-1.270</b> | <b>-1.228</b> |
| J428E  | <b>0.707</b>  | <b>-0.234</b> | <b>-0.002</b> | <b>0.216</b>  | <b>1.492</b>  | <b>2.444</b>  |
| J429E  | 0.115         | 0.673         | 0.601         | 0.942         | -0.834        | -0.425        |
| J430E  | <b>0.436</b>  | <b>0.701</b>  | <b>0.930</b>  | <b>1.192</b>  | <b>0.186</b>  | <b>0.573</b>  |
| J431Y  | 0.169         | -0.182        | -0.075        | 0.136         | 0.584         | 0.695         |
| J437Y  | <b>1.017</b>  | <b>-0.567</b> | <b>-0.325</b> | <b>-0.779</b> | <b>1.603</b>  | <b>2.084</b>  |
| J438Y  | <b>1.181</b>  | <b>1.366</b>  | <b>1.902</b>  | <b>1.023</b>  | <b>-0.231</b> | <b>-0.674</b> |
| J439S  | 0.467         | 0.074         | 0.462         | 0.330         | 0.179         | 0.135         |
| J443E  | <b>-0.078</b> | <b>2.263</b>  | <b>2.391</b>  | <b>2.734</b>  | <b>-0.242</b> | <b>-0.195</b> |
| J444C  | <b>1.433</b>  | <b>-1.194</b> | <b>-0.706</b> | <b>-0.854</b> | <b>1.294</b>  | <b>1.612</b>  |
| J447C  | <b>0.027</b>  | <b>1.113</b>  | <b>1.335</b>  | <b>1.532</b>  | <b>0.646</b>  | <b>0.847</b>  |
| J448E  | 0.934         | -0.743        | -0.430        | -0.593        | 0.407         | 0.393         |
| J449E  | <b>0.896</b>  | <b>0.362</b>  | <b>0.932</b>  | <b>1.172</b>  | <b>1.194</b>  | <b>1.669</b>  |
| J453E  | 0.854         | 1.289         | 1.104         | 1.068         | -0.889        | -0.922        |
| J454E  | <b>0.668</b>  | <b>0.471</b>  | <b>0.950</b>  | <b>0.944</b>  | <b>0.346</b>  | <b>1.679</b>  |
| J455Y  | <b>1.905</b>  | <b>-1.242</b> | <b>-0.724</b> | <b>-1.189</b> | <b>4.199</b>  | <b>3.674</b>  |
| J459Y  | 0.466         | -0.101        | -0.145        | 0.281         | 0.015         | 0.032         |
| J460Y  | -0.204        | 0.131         | -0.254        | 0.113         | -0.787        | -0.602        |
| J461Y  | <b>-1.146</b> | <b>4.815</b>  | <b>4.659</b>  | <b>5.393</b>  | <b>-1.443</b> | <b>-1.269</b> |
| J462E  | -0.266        | -0.155        | -0.758        | -0.524        | -0.646        | 0.160         |
| J469Y  | -0.138        | 0.708         | 0.206         | 0.254         | -1.063        | -0.928        |
| J473C  | <b>-1.246</b> | <b>2.305</b>  | <b>1.439</b>  | <b>2.221</b>  | <b>-1.162</b> | <b>-0.945</b> |
| J475E  | <b>0.679</b>  | <b>-0.933</b> | <b>-0.733</b> | <b>-1.089</b> | <b>0.845</b>  | <b>0.884</b>  |
| J476S  | -0.294        | -0.252        | -0.098        | 0.173         | -0.429        | 0.091         |
| J477C  | 0.022         | -0.071        | -0.347        | -0.342        | 0.347         | 0.537         |
| J478C  | -0.326        | 0.072         | -0.049        | 0.254         | 0.228         | 0.175         |
| J479Y  | <b>-0.522</b> | <b>3.255</b>  | <b>3.194</b>  | <b>2.986</b>  | <b>-1.103</b> | <b>-1.123</b> |
| J480Y  | 0.746         | -0.437        | -0.368        | -0.514        | 0.380         | 0.515         |
| J482C  | -0.357        | 0.552         | 0.012         | 0.809         | -0.802        | -0.407        |
| J483C  | -0.001        | 0.351         | -0.044        | 0.306         | -0.542        | -0.390        |
| J484C  | 0.286         | -0.548        | -0.816        | -0.880        | 0.016         | 0.042         |
| J485E  | <b>0.748</b>  | <b>-1.577</b> | <b>-1.487</b> | <b>-1.790</b> | <b>1.509</b>  | <b>2.050</b>  |
| J486Y  | -0.010        | 0.078         | -0.108        | -0.047        | 0.241         | 0.323         |
| J488Y  | 0.267         | -0.560        | -0.170        | -0.675        | 0.923         | 0.530         |
| J489Y  | -0.021        | -0.220        | -0.090        | -0.059        | -0.142        | -0.048        |
| J491C  | -1.269        | 0.387         | 0.180         | 0.926         | -0.326        | -0.398        |
| J494E  | 0.019         | -0.904        | -1.399        | -1.367        | 0.304         | 0.318         |
| J495Y  | -0.558        | 0.611         | 0.144         | 0.799         | -1.098        | -0.895        |
| J497Y  | -0.706        | 0.734         | -0.046        | 0.357         | -1.033        | -0.894        |
| J500E  | -0.223        | 0.622         | -0.216        | 0.000         | -0.504        | -0.574        |
| J501E  | -0.294        | -0.046        | -0.214        | -0.103        | -0.281        | -0.239        |
| J502E  | <b>-0.624</b> | <b>-0.167</b> | <b>0.195</b>  | <b>0.273</b>  | <b>0.141</b>  | <b>0.230</b>  |
| J503E  | -0.543        | -0.992        | -0.546        | -0.574        | 0.831         | 1.280         |
| J505Y  | <b>0.345</b>  | <b>2.125</b>  | <b>1.171</b>  | <b>0.819</b>  | <b>-0.723</b> | <b>-0.863</b> |
| J506Y  | -0.054        | 0.534         | 0.538         | 0.293         | 0.071         | 0.006         |
| J507Y  | <b>-0.825</b> | <b>2.394</b>  | <b>1.244</b>  | <b>1.645</b>  | <b>-1.174</b> | <b>-1.208</b> |
| J508Y  | <b>-1.280</b> | <b>1.785</b>  | <b>0.963</b>  | <b>1.874</b>  | <b>-1.494</b> | <b>-1.364</b> |
| J509Y  | <b>-0.496</b> | <b>1.917</b>  | <b>0.875</b>  | <b>1.147</b>  | <b>-0.910</b> | <b>-1.018</b> |
| J510Y  | <b>-1.524</b> | <b>2.460</b>  | <b>1.302</b>  | <b>2.016</b>  | <b>-1.238</b> | <b>-1.158</b> |

|       |        |        |        |        |        |        |
|-------|--------|--------|--------|--------|--------|--------|
| J511Y | -1.156 | 1.287  | 1.187  | 1.250  | -0.874 | -0.934 |
| J513Y | -1.354 | 0.535  | 0.665  | 0.911  | -0.602 | -0.390 |
| J514E | -0.593 | 0.048  | -0.104 | -0.217 | 0.776  | 0.246  |
| J515Y | 0.069  | 0.354  | 0.827  | 1.338  | -0.688 | -0.215 |
| J518Y | 0.841  | -0.283 | 0.198  | 0.028  | 0.621  | 0.688  |
| J519Y | 1.256  | -0.292 | 0.272  | 0.234  | 1.589  | 1.772  |
| J520Y | 0.993  | -0.375 | 0.008  | -0.387 | 1.267  | 1.022  |
| J521Y | 0.343  | 2.406  | 0.947  | 1.200  | -1.263 | -1.309 |
| J522E | 0.718  | 0.446  | -0.261 | 0.075  | -0.707 | -0.740 |
| J523E | 0.863  | -1.142 | -1.097 | -1.155 | 1.582  | 1.985  |
| J524Y | 0.513  | 0.002  | -0.360 | -0.196 | -1.000 | -0.943 |
| J525E | 0.796  | 3.702  | 3.813  | 2.757  | -1.240 | -1.458 |
| J528E | -0.736 | 4.111  | 4.129  | 4.919  | -1.103 | -1.131 |
| J529E | 0.291  | 1.158  | 1.922  | 2.443  | -0.539 | -0.022 |
| J530Y | 0.878  | -0.340 | -0.074 | -0.086 | 0.918  | 0.810  |
| J531Y | 0.213  | 0.791  | 0.370  | 0.764  | -0.756 | -0.583 |
| J532Y | -0.356 | 2.008  | 1.872  | 1.896  | -1.084 | -1.027 |
| J533Y | 0.926  | -0.460 | -0.239 | -0.484 | -0.097 | 0.051  |
| J534E | 1.745  | -0.494 | -0.328 | -0.707 | 0.618  | 0.375  |
| J536Y | 0.771  | -1.334 | -0.588 | -0.575 | 2.106  | 2.387  |
| J537E | -0.618 | 1.565  | 0.940  | 1.378  | -0.723 | -0.752 |
| J538E | -0.216 | 0.968  | 0.519  | 0.740  | -0.345 | -0.530 |
| J539C | -0.494 | 3.893  | 3.157  | 3.313  | -1.195 | -1.299 |
| J540C | -0.751 | 0.625  | 0.400  | 0.351  | -0.538 | -0.206 |
| J541E | -0.986 | 4.557  | 3.132  | 3.380  | -1.355 | -1.329 |
| J542E | 0.182  | 0.517  | 0.203  | 0.626  | -0.131 | 0.080  |
| J543Y | -0.049 | 3.438  | 1.992  | 2.128  | -1.185 | -1.222 |
| J545Y | -0.647 | 2.085  | 1.701  | 2.445  | -1.137 | -1.133 |
| J546Y | -0.193 | 1.478  | 0.663  | 1.508  | -1.066 | -0.954 |
| J547E | -0.372 | -0.392 | -0.515 | -0.472 | -0.336 | 0.079  |
| J548Y | -0.018 | -0.725 | -0.613 | -0.931 | 0.907  | 0.692  |
| J549E | 0.884  | 0.065  | 0.165  | -0.098 | 0.115  | 0.219  |
| J550E | 0.455  | -0.410 | -0.632 | -0.923 | -0.134 | -0.069 |
| J551E | 0.317  | 1.110  | 0.401  | 0.353  | -0.814 | -0.926 |
| J552E | 0.132  | 0.229  | 0.133  | 0.523  | -0.517 | -0.481 |
| J553E | -0.550 | 0.718  | 0.375  | 0.635  | -0.522 | -0.497 |
| J554Y | -0.018 | -0.779 | -0.851 | -0.767 | -0.402 | -0.256 |
| J555Y | 0.698  | -0.424 | -0.839 | -0.810 | -0.081 | -0.169 |
| J556Y | -0.279 | 1.349  | 1.101  | 1.382  | -0.788 | -0.459 |
| J557E | -0.179 | 0.397  | -0.050 | 0.206  | -0.049 | -0.166 |
| J558E | -0.550 | -0.146 | -1.081 | -0.937 | -0.569 | -0.565 |
| J559S | -1.083 | 1.401  | 0.968  | 1.578  | -1.176 | -1.028 |
| J560S | -0.595 | 3.051  | 2.843  | 3.709  | -1.233 | -1.173 |
| J561Y | -1.214 | 0.838  | -0.435 | 0.508  | -0.727 | -0.630 |
| J562Y | -0.466 | 0.119  | -0.024 | 0.256  | -0.135 | -0.044 |
| J563Y | -0.310 | -0.552 | -0.443 | -0.515 | 0.240  | 0.301  |
| J564Y | -1.217 | 0.544  | 0.448  | 0.839  | -0.471 | -0.472 |
| J565Y | -0.154 | -1.174 | -0.880 | -0.991 | 0.936  | 0.872  |
| J566E | -1.323 | 3.591  | 2.969  | 3.006  | -1.473 | -1.428 |
| J567E | -0.908 | 0.796  | -0.423 | -0.010 | -1.180 | -1.080 |
| J568E | -0.645 | -0.655 | -0.796 | -0.571 | -0.602 | -0.494 |
| J569E | -2.352 | 6.377  | 6.525  | 6.243  | -1.722 | -1.709 |
| J570E | -1.185 | 2.253  | 1.915  | 2.304  | -0.649 | -0.608 |

|       |               |               |               |               |               |               |
|-------|---------------|---------------|---------------|---------------|---------------|---------------|
| J571E | <b>-1.605</b> | <b>2.519</b>  | <b>1.952</b>  | <b>2.302</b>  | <b>-1.316</b> | <b>-1.170</b> |
| J572E | -0.794        | 2.023         | 1.588         | 1.664         | -0.474        | -0.598        |
| J573Y | -0.300        | -0.174        | -0.754        | -0.947        | -0.241        | -0.348        |
| J575Y | -0.792        | 0.150         | -0.507        | -0.226        | -0.793        | -0.732        |
| J576E | -0.465        | 2.140         | 1.540         | 1.901         | -1.166        | -1.117        |
| J577E | <b>-0.367</b> | <b>2.569</b>  | <b>2.491</b>  | <b>2.063</b>  | <b>-0.582</b> | <b>-0.768</b> |
| J578Y | 0.275         | -0.828        | -0.498        | -0.956        | 1.688         | 1.395         |
| J580Y | 0.374         | 0.543         | 0.864         | 1.448         | -0.843        | -0.555        |
| J582C | 0.753         | -1.405        | -1.141        | -1.563        | 0.373         | 0.537         |
| J583E | <b>-0.516</b> | <b>2.681</b>  | <b>2.535</b>  | <b>2.627</b>  | <b>-0.869</b> | <b>-0.190</b> |
| J584E | <b>1.664</b>  | <b>-1.129</b> | <b>-0.644</b> | <b>-0.767</b> | <b>2.773</b>  | <b>2.711</b>  |
| J585Y | 0.516         | -0.090        | -0.087        | -0.149        | 0.180         | 0.012         |
| J586E | <b>-0.477</b> | <b>1.546</b>  | <b>1.910</b>  | <b>2.242</b>  | <b>-0.999</b> | <b>-0.881</b> |
| J588Y | <b>-1.167</b> | <b>2.823</b>  | <b>2.780</b>  | <b>3.221</b>  | <b>-1.548</b> | <b>-1.504</b> |
| J589E | <b>1.207</b>  | <b>0.300</b>  | <b>0.368</b>  | <b>-0.089</b> | <b>1.098</b>  | <b>0.541</b>  |
| J590Y | 0.319         | 0.979         | 0.594         | 0.635         | -0.877        | -0.949        |
| J591E | -0.628        | 1.229         | 0.461         | 1.121         | -0.618        | -0.384        |
| J592C | <b>-0.517</b> | <b>2.322</b>  | <b>1.985</b>  | <b>2.499</b>  | <b>-0.756</b> | <b>-0.410</b> |
| J593C | 0.154         | 0.297         | -0.028        | 0.472         | 0.743         | 0.977         |
| J594E | <b>1.127</b>  | <b>-0.092</b> | <b>-0.109</b> | <b>-0.496</b> | <b>0.040</b>  | <b>-0.114</b> |
| J595E | <b>-0.365</b> | <b>2.744</b>  | <b>2.325</b>  | <b>2.323</b>  | <b>-0.859</b> | <b>-0.982</b> |
| J596C | <b>0.743</b>  | <b>-1.026</b> | <b>-0.631</b> | <b>-0.872</b> | <b>5.502</b>  | <b>4.702</b>  |
| J597E | 0.100         | 0.017         | -0.884        | -0.415        | -0.802        | -0.671        |
| J598E | 1.228         | -0.845        | -1.170        | -1.493        | -0.007        | -0.130        |
| J599E | 0.180         | -0.293        | -0.258        | -0.043        | -0.368        | -0.154        |
| J600E | -0.935        | 1.180         | 0.304         | 0.665         | -1.276        | -1.122        |
| J601Y | <b>-0.530</b> | <b>0.742</b>  | <b>-0.341</b> | <b>-0.201</b> | <b>-1.251</b> | <b>-1.227</b> |
| J602E | <b>0.907</b>  | <b>-1.915</b> | <b>-1.310</b> | <b>-2.083</b> | <b>6.469</b>  | <b>5.569</b>  |
| J603E | -0.323        | 0.836         | 0.073         | 0.499         | -0.949        | -0.829        |
| J604E | -1.010        | 0.900         | 0.257         | 0.374         | -0.295        | -0.517        |
| J605Y | -0.007        | -1.140        | -0.768        | -0.868        | 1.610         | 1.995         |
| J606E | -0.164        | 0.474         | 0.071         | 0.066         | -0.616        | -0.692        |
| J607Y | 0.363         | -0.767        | -0.918        | -1.024        | 0.799         | 0.859         |
| J608E | -0.344        | -0.258        | -1.116        | -0.975        | -0.867        | -0.720        |
| J609E | -0.322        | 0.176         | -0.140        | 0.051         | -0.287        | 0.269         |
| J610Y | <b>-1.122</b> | <b>1.690</b>  | <b>0.015</b>  | <b>0.713</b>  | <b>-0.968</b> | <b>-0.950</b> |
| J611Y | -0.637        | -0.091        | -0.611        | -0.532        | -0.143        | -0.287        |
| J612Y | 0.519         | -0.800        | -1.290        | -1.203        | -0.369        | -0.035        |
| J613C | -0.435        | 1.675         | 1.072         | 1.285         | -0.450        | -0.314        |
| J614Y | -0.315        | 1.046         | 0.744         | 1.035         | -0.953        | -0.811        |
| J615E | -0.647        | -0.471        | -0.259        | -0.459        | -0.130        | -0.088        |
| J616E | -1.435        | 1.100         | 0.287         | 0.974         | -0.976        | -0.919        |
| J617E | -0.533        | -0.728        | -0.774        | -0.662        | 0.588         | 0.612         |
| J619Y | -1.327        | 0.358         | -0.555        | -0.156        | -0.976        | -0.954        |
| J620Y | <b>-1.597</b> | <b>2.313</b>  | <b>1.551</b>  | <b>2.148</b>  | <b>-1.288</b> | <b>-0.669</b> |
| J621E | -0.297        | -1.493        | -1.496        | -1.695        | 0.462         | 0.847         |
| J622Y | <b>-0.604</b> | <b>0.697</b>  | <b>-0.428</b> | <b>-0.471</b> | <b>-0.946</b> | <b>-1.018</b> |
| J623E | <b>0.316</b>  | <b>-1.025</b> | <b>-1.031</b> | <b>-0.927</b> | <b>2.886</b>  | <b>2.608</b>  |
| J624E | -0.409        | 0.466         | 0.530         | 0.861         | 0.437         | 0.569         |
| J625E | -0.282        | 0.673         | 0.620         | 0.803         | -0.885        | -0.950        |
| J626Y | -0.029        | 0.429         | -0.316        | -0.294        | -0.798        | -0.864        |
| J627E | <b>-1.038</b> | <b>3.007</b>  | <b>2.104</b>  | <b>2.879</b>  | <b>-1.174</b> | <b>-1.166</b> |
| J628E | -1.334        | 1.959         | 0.570         | 1.300         | -0.978        | -1.021        |

|       |               |               |               |               |               |               |
|-------|---------------|---------------|---------------|---------------|---------------|---------------|
| J629E | <b>-0.487</b> | <b>1.039</b>  | <b>0.401</b>  | <b>0.412</b>  | <b>-0.772</b> | <b>-0.738</b> |
| J631Y | -0.809        | 1.685         | 1.113         | 1.458         | -1.264        | -1.173        |
| J632E | -0.319        | 0.958         | 0.401         | 1.060         | -0.721        | -0.630        |
| J633E | -1.146        | 1.197         | 0.580         | 1.277         | -0.590        | -0.544        |
| J634E | -1.115        | 1.971         | 1.501         | 1.660         | -1.060        | -1.010        |
| J635E | -0.113        | 0.266         | 0.347         | 0.909         | -0.360        | -0.070        |
| J636Y | 0.592         | -0.488        | -0.216        | 0.043         | 0.744         | 1.009         |
| J637Y | <b>-0.197</b> | <b>2.255</b>  | <b>0.290</b>  | <b>0.652</b>  | <b>-1.299</b> | <b>-1.331</b> |
| J639E | -0.085        | -0.008        | 0.218         | 0.010         | 0.695         | 1.012         |
| J640E | <b>1.969</b>  | <b>-1.542</b> | <b>-0.782</b> | <b>-1.312</b> | <b>4.633</b>  | <b>4.342</b>  |
| J641E | 0.835         | -0.507        | -0.766        | -0.569        | 0.053         | 0.478         |
| J643Y | 0.206         | -0.390        | -0.051        | 0.044         | 0.680         | 1.522         |
| J644Y | <b>1.008</b>  | <b>-0.734</b> | <b>-0.221</b> | <b>-0.469</b> | <b>2.842</b>  | <b>3.141</b>  |
| J645E | <b>2.771</b>  | <b>-0.378</b> | <b>0.393</b>  | <b>-0.297</b> | <b>1.185</b>  | <b>0.663</b>  |
| J646E | <b>0.403</b>  | <b>-0.319</b> | <b>-0.455</b> | <b>-0.522</b> | <b>1.734</b>  | <b>1.926</b>  |
| J647E | <b>1.192</b>  | <b>-0.020</b> | <b>0.463</b>  | <b>0.322</b>  | <b>1.623</b>  | <b>1.923</b>  |
| J648E | 0.483         | 0.269         | 0.720         | 0.989         | -0.130        | 0.337         |
| J649Y | 0.101         | 0.663         | -0.018        | 0.343         | -1.097        | -1.115        |
| J650Y | 0.807         | -0.992        | -0.612        | -0.652        | 0.744         | 1.127         |
| J651E | 0.073         | 0.143         | 0.053         | 0.167         | -0.120        | 0.006         |
| J652E | <b>1.201</b>  | <b>-1.822</b> | <b>-1.028</b> | <b>-1.614</b> | <b>3.637</b>  | <b>3.375</b>  |
| J653Y | <b>0.250</b>  | <b>-0.049</b> | <b>-0.177</b> | <b>-0.354</b> | <b>1.409</b>  | <b>0.930</b>  |
| J654Y | <b>-0.086</b> | <b>-1.082</b> | <b>-0.686</b> | <b>-0.990</b> | <b>2.314</b>  | <b>2.051</b>  |
| J655Y | -0.055        | 0.820         | 0.091         | 0.022         | -0.964        | -0.984        |
| J656Y | 0.364         | 0.766         | 0.267         | 0.417         | -0.390        | -0.531        |
| J657E | -0.459        | 0.595         | 0.196         | 0.605         | -1.114        | -0.827        |
| J658E | <b>1.633</b>  | <b>-1.348</b> | <b>-1.234</b> | <b>-1.683</b> | <b>3.852</b>  | <b>3.068</b>  |
| J659Y | 0.149         | -0.988        | -1.186        | -1.263        | 0.001         | 0.449         |
| J660Y | 0.138         | 1.534         | 0.895         | 0.983         | -1.058        | -1.110        |
| J661Y | 0.267         | 0.359         | 0.646         | 0.646         | 1.079         | 0.859         |
| J662C | <b>0.284</b>  | <b>-0.989</b> | <b>-0.582</b> | <b>-0.638</b> | <b>1.196</b>  | <b>1.777</b>  |
| J663Y | -0.100        | 0.750         | 0.204         | 0.630         | 0.028         | 0.046         |
| J664Y | -0.238        | -0.543        | -0.694        | -1.034        | 0.272         | -0.030        |
| J665Y | 0.409         | -0.266        | -0.317        | -0.670        | 1.075         | 1.018         |
| J666Y | 0.250         | -0.955        | -1.280        | -1.328        | 0.071         | 0.082         |
| J667Y | 0.087         | 0.657         | 0.355         | 0.153         | -0.598        | -0.755        |
| J668Y | 0.772         | -0.424        | -0.807        | -0.969        | -0.224        | -0.217        |
| J669Y | <b>-1.003</b> | <b>0.352</b>  | <b>-0.249</b> | <b>0.364</b>  | <b>-1.274</b> | <b>-1.178</b> |
| J670Y | 0.061         | 0.754         | 0.231         | 0.310         | -0.509        | -0.415        |
| J671Y | 0.333         | 1.092         | 0.156         | 0.162         | -0.931        | -1.028        |
| J672Y | -0.680        | 1.336         | 1.429         | 1.820         | -0.711        | -0.656        |
| J673Y | 0.076         | 0.228         | 0.440         | 0.206         | 1.084         | 0.641         |
| J674Y | -0.483        | -0.726        | -0.946        | -0.960        | -0.128        | -0.151        |
| J675Y | -1.113        | -0.540        | -0.970        | -0.961        | -0.103        | -0.255        |
| J676Y | <b>0.156</b>  | <b>-0.081</b> | <b>-1.091</b> | <b>-1.003</b> | <b>-0.738</b> | <b>-0.719</b> |
| J677Y | <b>-0.696</b> | <b>0.575</b>  | <b>-0.195</b> | <b>0.208</b>  | <b>-1.090</b> | <b>-0.982</b> |
| J678Y | <b>-0.856</b> | <b>-0.286</b> | <b>-0.619</b> | <b>-0.746</b> | <b>-0.509</b> | <b>-0.656</b> |
| J679Y | 0.669         | -1.305        | -1.005        | -1.503        | 1.226         | 1.027         |
| J680Y | 0.454         | -0.697        | -1.234        | -1.215        | -0.356        | 0.213         |
| J681Y | <b>0.013</b>  | <b>-1.242</b> | <b>-1.086</b> | <b>-1.188</b> | <b>0.351</b>  | <b>0.052</b>  |
| J682Y | 0.243         | -0.074        | -0.817        | -0.706        | -0.786        | -0.741        |
| J683Y | 0.959         | -0.870        | -0.901        | -1.259        | 0.374         | 0.108         |
| J684Y | <b>-1.246</b> | <b>1.095</b>  | <b>0.692</b>  | <b>1.165</b>  | <b>-1.359</b> | <b>-1.232</b> |

|       |               |               |               |               |               |               |
|-------|---------------|---------------|---------------|---------------|---------------|---------------|
| J685Y | -0.663        | 0.316         | 0.071         | 0.467         | -1.204        | -0.919        |
| J686Y | <b>-1.877</b> | <b>2.923</b>  | <b>2.655</b>  | <b>3.447</b>  | <b>-1.104</b> | <b>-0.854</b> |
| J687Y | -0.966        | 0.661         | 0.079         | 0.271         | -0.976        | -0.724        |
| J688Y | 0.257         | -0.592        | -0.921        | -1.154        | 0.291         | -0.098        |
| J689Y | -1.262        | 1.361         | 1.008         | 1.530         | -0.617        | -0.225        |
| J690C | -0.460        | -0.843        | -1.241        | -1.058        | 0.075         | 0.047         |
| J692Y | 0.726         | -0.032        | 0.051         | -0.303        | 0.482         | 0.623         |
| J693Y | <b>1.684</b>  | <b>-0.255</b> | <b>-0.322</b> | <b>-0.372</b> | <b>0.221</b>  | <b>0.265</b>  |
| J694Y | <b>0.230</b>  | <b>-0.884</b> | <b>-0.260</b> | <b>-0.653</b> | <b>-0.151</b> | <b>-0.058</b> |
| J696Y | 0.842         | -0.598        | 0.757         | 0.213         | 0.728         | 1.136         |
| J697Y | <b>1.844</b>  | <b>-1.454</b> | <b>-0.662</b> | <b>-0.773</b> | <b>1.545</b>  | <b>1.653</b>  |
| J698Y | 0.931         | -0.722        | -0.156        | -0.360        | 1.289         | 1.363         |
| J699Y | 1.349         | -1.316        | -1.067        | -1.016        | 0.841         | 1.177         |
| J700E | <b>0.582</b>  | <b>-0.898</b> | <b>-0.317</b> | <b>-0.474</b> | <b>2.726</b>  | <b>2.485</b>  |
| J702Y | 1.397         | 0.291         | 0.837         | 0.095         | -1.211        | -0.852        |
| J703Y | <b>-1.314</b> | <b>0.341</b>  | <b>1.082</b>  | <b>0.305</b>  | <b>-0.596</b> | <b>-0.272</b> |
| J704Y | <b>1.042</b>  | <b>-0.073</b> | <b>0.019</b>  | <b>-0.292</b> | <b>2.672</b>  | <b>2.245</b>  |
| J705Y | -0.904        | 0.480         | 0.951         | 0.525         | -0.181        | -0.183        |
| J706Y | 0.106         | -0.564        | 0.332         | -0.027        | 0.820         | 0.750         |
| J707Y | <b>0.946</b>  | <b>-0.919</b> | <b>-0.870</b> | <b>-0.768</b> | <b>1.430</b>  | <b>1.222</b>  |
| J708Y | -0.741        | -0.908        | -0.201        | -0.298        | 1.591         | 1.536         |
| J709Y | 0.862         | -0.551        | -0.409        | -0.448        | 1.080         | 1.215         |
| J710Y | 0.318         | -0.060        | -0.100        | 0.257         | 1.239         | 1.329         |
| J711Y | -0.443        | -0.104        | -0.475        | -0.331        | 1.089         | 1.131         |
| J712Y | 0.923         | -0.654        | -0.445        | -0.870        | 0.362         | 0.586         |
| J713Y | <b>0.709</b>  | <b>-0.520</b> | <b>-0.545</b> | <b>-0.758</b> | <b>2.553</b>  | <b>1.937</b>  |
| J714Y | <b>1.700</b>  | <b>-0.695</b> | <b>-0.785</b> | <b>-0.500</b> | <b>-0.278</b> | <b>-0.064</b> |
| J715Y | -0.184        | 1.340         | 1.990         | 0.972         | -0.486        | -0.281        |
| J718Y | 0.608         | -1.150        | -1.150        | -0.970        | 0.883         | 0.827         |
| J719Y | <b>0.746</b>  | <b>-0.172</b> | <b>-0.678</b> | <b>-0.261</b> | <b>-0.111</b> | <b>0.138</b>  |
| J720Y | 1.435         | -0.824        | -0.507        | -0.459        | 1.104         | 0.857         |
| J775Y | 0.339         | -0.613        | 0.015         | -0.234        | 2.920         | 1.786         |
| KA-10 | 0.393         | -1.075        | -0.680        | -0.636        | 1.318         | 1.757         |
| KA-12 | 0.330         | -0.186        | -0.644        | -0.422        | 1.195         | 1.438         |
| KA-13 | 0.228         | 0.298         | 0.586         | 0.005         | -0.495        | -0.388        |
| KA-14 | -0.729        | -0.754        | -0.903        | -0.526        | 0.070         | 0.094         |
| KA-17 | -0.932        | 0.165         | -0.042        | -0.294        | -0.529        | -0.549        |
| KA-2  | -0.117        | -0.048        | 0.065         | 0.181         | 0.643         | 0.720         |
| KA-22 | 0.032         | 0.422         | 0.230         | 0.388         | -0.637        | -0.429        |
| KA-23 | <b>1.162</b>  | <b>-0.545</b> | <b>0.102</b>  | <b>0.792</b>  | <b>5.331</b>  | <b>4.465</b>  |
| KA-24 | -0.132        | -0.243        | -0.938        | -0.386        | 0.327         | 0.412         |
| KA-25 | -0.293        | -0.436        | -0.435        | -0.065        | 0.906         | 0.674         |
| KA-26 | -0.044        | -0.250        | 0.115         | -0.061        | 0.438         | 0.572         |
| KA-27 | <b>-0.308</b> | <b>-0.324</b> | <b>-0.756</b> | <b>-0.378</b> | <b>2.115</b>  | <b>1.989</b>  |
| KA-28 | <b>1.129</b>  | <b>-0.538</b> | <b>-0.140</b> | <b>-0.468</b> | <b>1.894</b>  | <b>2.065</b>  |
| KA-29 | -0.456        | 0.016         | 0.066         | -0.012        | -0.208        | 0.074         |
| KA-3  | 0.130         | 0.229         | 0.391         | 0.257         | -0.189        | -0.032        |
| KA-30 | <b>-0.957</b> | <b>-0.674</b> | <b>-0.601</b> | <b>-0.453</b> | <b>-0.061</b> | <b>-0.065</b> |
| KA-31 | -1.634        | 0.532         | 0.819         | 0.333         | -0.807        | -0.649        |
| KA-32 | <b>-1.273</b> | <b>0.200</b>  | <b>-0.464</b> | <b>-0.122</b> | <b>-0.619</b> | <b>-0.340</b> |
| KA-33 | <b>-0.912</b> | <b>-0.494</b> | <b>-0.868</b> | <b>-0.206</b> | <b>-0.692</b> | <b>-0.336</b> |
| KA-34 | -0.310        | 0.755         | 1.336         | 0.789         | -0.529        | -0.383        |
| KA-36 | -0.555        | -0.272        | -0.251        | -0.682        | 0.262         | 0.477         |

|       |               |               |               |               |               |               |
|-------|---------------|---------------|---------------|---------------|---------------|---------------|
| KA-37 | -0.729        | -0.175        | 0.184         | -0.049        | -0.148        | 0.004         |
| KA-38 | -0.591        | 0.101         | 0.019         | -0.175        | -0.392        | -0.314        |
| KA-4  | 0.239         | -0.462        | -0.797        | -0.429        | 0.686         | 0.674         |
| KA-42 | <b>-1.279</b> | <b>0.655</b>  | <b>0.725</b>  | <b>0.538</b>  | <b>-0.952</b> | <b>-0.620</b> |
| KA-5  | -1.382        | 0.945         | 1.355         | 0.558         | -0.511        | -0.270        |
| KA-50 | -0.004        | -0.169        | -1.072        | -0.058        | 0.012         | 0.138         |
| KA-52 | <b>-1.619</b> | <b>-0.301</b> | <b>-0.422</b> | <b>0.185</b>  | <b>-0.729</b> | <b>-0.566</b> |
| KA-53 | <b>-0.797</b> | <b>-0.306</b> | <b>-0.563</b> | <b>-0.351</b> | <b>0.406</b>  | <b>0.298</b>  |
| KA-6  | <b>0.011</b>  | <b>-0.940</b> | <b>-0.949</b> | <b>-0.664</b> | <b>0.381</b>  | <b>0.561</b>  |
| KA-7  | -0.857        | 0.373         | 0.297         | -0.055        | -0.599        | -0.436        |
| KA-9  | -0.528        | 0.279         | 0.536         | 0.931         | -0.484        | -0.364        |

| EGF mode Mean Intensity | EGF mode Integral intensity (volume weighted) | EGF mode Integral intensity (mean int. weighted) | EGF mode Integral intensity | EGF Dist. to nuc. (volume weighted   nuc. size normalized) | EGF Dist. to nuc. (mean int. weighted   nuc. size normalized) | EGF Dist. to nuc. (nuc. size normalized) |
|-------------------------|-----------------------------------------------|--------------------------------------------------|-----------------------------|------------------------------------------------------------|---------------------------------------------------------------|------------------------------------------|
| -1.692                  | -0.761                                        | -1.318                                           | -1.889                      | 5.419                                                      | 4.157                                                         | 3.441                                    |
| 0.258                   | -0.383                                        | -0.322                                           | -0.148                      | -0.674                                                     | -0.657                                                        | -0.408                                   |
| <b>1.211</b>            | <b>2.368</b>                                  | <b>1.323</b>                                     | <b>2.214</b>                | <b>-0.518</b>                                              | <b>-0.310</b>                                                 | <b>0.058</b>                             |
| 0.160                   | 0.121                                         | 0.250                                            | 0.684                       | -0.019                                                     | 0.177                                                         | 1.258                                    |
| 0.658                   | 1.553                                         | 2.093                                            | 0.771                       | 0.747                                                      | 0.804                                                         | 1.213                                    |
| 0.862                   | 2.134                                         | 2.626                                            | 1.843                       | -0.295                                                     | -0.182                                                        | 0.928                                    |
| 0.243                   | 0.569                                         | 1.426                                            | 1.082                       | 2.079                                                      | 1.790                                                         | 1.993                                    |
| 0.573                   | 1.167                                         | 1.393                                            | 1.223                       | 0.328                                                      | 0.277                                                         | 1.367                                    |
| -0.131                  | 0.701                                         | 1.171                                            | 0.388                       | 0.236                                                      | 0.234                                                         | 0.903                                    |
| <b>0.320</b>            | <b>1.186</b>                                  | <b>1.399</b>                                     | <b>1.029</b>                | <b>0.430</b>                                               | <b>0.559</b>                                                  | <b>1.814</b>                             |
| <b>1.062</b>            | <b>1.108</b>                                  | <b>1.159</b>                                     | <b>0.988</b>                | <b>0.367</b>                                               | <b>-0.166</b>                                                 | <b>1.103</b>                             |
| -0.617                  | -0.183                                        | 0.098                                            | -0.918                      | 0.899                                                      | 1.101                                                         | 0.891                                    |
| -0.696                  | -0.706                                        | -0.763                                           | -0.582                      | -0.096                                                     | 0.175                                                         | -0.223                                   |
| -0.010                  | 0.468                                         | 0.544                                            | -0.810                      | -0.249                                                     | 0.187                                                         | 0.429                                    |
| <b>-1.216</b>           | <b>-0.767</b>                                 | <b>-0.881</b>                                    | <b>-0.300</b>               | <b>1.942</b>                                               | <b>1.296</b>                                                  | <b>0.988</b>                             |
| 0.458                   | 0.468                                         | 0.654                                            | 0.973                       | -0.635                                                     | -0.320                                                        | 0.171                                    |
| 0.250                   | 0.054                                         | 0.099                                            | 0.185                       | 1.152                                                      | 0.918                                                         | 1.797                                    |
| -0.090                  | -0.110                                        | 0.075                                            | 0.045                       | 1.941                                                      | 1.818                                                         | 2.000                                    |
| 0.374                   | 0.866                                         | 1.124                                            | 0.211                       | 0.770                                                      | 0.961                                                         | 1.562                                    |
| -0.182                  | -0.273                                        | -0.314                                           | -0.216                      | -0.267                                                     | -0.018                                                        | 0.057                                    |
| 0.075                   | -0.160                                        | -0.007                                           | 0.175                       | -0.437                                                     | -0.072                                                        | 0.393                                    |
| 0.742                   | 1.382                                         | 2.165                                            | 1.427                       | -0.490                                                     | -0.318                                                        | -0.489                                   |
| <b>-0.680</b>           | <b>-0.594</b>                                 | <b>-0.486</b>                                    | <b>-1.351</b>               | <b>2.685</b>                                               | <b>2.995</b>                                                  | <b>3.308</b>                             |
| <b>-0.082</b>           | <b>-0.535</b>                                 | <b>-0.433</b>                                    | <b>0.078</b>                | <b>1.981</b>                                               | <b>2.620</b>                                                  | <b>1.272</b>                             |
| <b>-0.295</b>           | <b>-0.770</b>                                 | <b>-0.674</b>                                    | <b>-0.788</b>               | <b>1.857</b>                                               | <b>1.991</b>                                                  | <b>3.279</b>                             |
| <b>-0.101</b>           | <b>0.051</b>                                  | <b>0.087</b>                                     | <b>-0.903</b>               | <b>1.876</b>                                               | <b>1.919</b>                                                  | <b>2.546</b>                             |
| <b>-0.611</b>           | <b>-0.632</b>                                 | <b>-0.683</b>                                    | <b>-0.632</b>               | <b>1.957</b>                                               | <b>1.994</b>                                                  | <b>2.223</b>                             |
| -0.748                  | -0.849                                        | -0.912                                           | -0.652                      | 0.752                                                      | 1.048                                                         | 0.618                                    |
| <b>-0.774</b>           | <b>-0.518</b>                                 | <b>-0.522</b>                                    | <b>-1.948</b>               | <b>2.077</b>                                               | <b>1.910</b>                                                  | <b>2.700</b>                             |
| <b>0.273</b>            | <b>0.240</b>                                  | <b>0.588</b>                                     | <b>0.315</b>                | <b>2.407</b>                                               | <b>2.556</b>                                                  | <b>3.846</b>                             |
| <b>1.935</b>            | <b>1.645</b>                                  | <b>2.280</b>                                     | <b>1.778</b>                | <b>2.302</b>                                               | <b>2.106</b>                                                  | <b>3.536</b>                             |
| <b>-0.745</b>           | <b>-1.026</b>                                 | <b>-0.894</b>                                    | <b>-0.590</b>               | <b>2.467</b>                                               | <b>1.908</b>                                                  | <b>1.122</b>                             |
| <b>-1.054</b>           | <b>-0.865</b>                                 | <b>-0.919</b>                                    | <b>-1.127</b>               | <b>2.773</b>                                               | <b>1.935</b>                                                  | <b>0.951</b>                             |
| -0.465                  | -0.924                                        | -0.731                                           | -0.095                      | -0.063                                                     | -0.110                                                        | -0.906                                   |
| -1.124                  | -0.949                                        | -0.700                                           | -0.818                      | 0.640                                                      | 0.603                                                         | 0.393                                    |
| <b>0.118</b>            | <b>-0.226</b>                                 | <b>-0.255</b>                                    | <b>0.269</b>                | <b>1.614</b>                                               | <b>1.356</b>                                                  | <b>1.408</b>                             |
| -0.256                  | -1.016                                        | -0.907                                           | -0.291                      | 1.030                                                      | 0.764                                                         | 0.885                                    |
| 0.298                   | 0.191                                         | 0.432                                            | 0.338                       | 1.580                                                      | 1.335                                                         | 1.626                                    |
| <b>0.206</b>            | <b>0.056</b>                                  | <b>0.342</b>                                     | <b>0.280</b>                | <b>1.401</b>                                               | <b>1.612</b>                                                  | <b>2.034</b>                             |
| 0.062                   | 0.034                                         | 0.126                                            | 0.278                       | -0.020                                                     | -0.056                                                        | 0.027                                    |
| <b>1.546</b>            | <b>2.117</b>                                  | <b>3.001</b>                                     | <b>1.751</b>                | <b>-0.701</b>                                              | <b>-0.319</b>                                                 | <b>0.440</b>                             |
| 1.121                   | 1.777                                         | 2.288                                            | 1.864                       | -2.115                                                     | -1.541                                                        | -0.927                                   |
| <b>-0.622</b>           | <b>-0.670</b>                                 | <b>-0.623</b>                                    | <b>-0.877</b>               | <b>-0.064</b>                                              | <b>-0.108</b>                                                 | <b>-0.694</b>                            |
| -0.164                  | 0.584                                         | 0.907                                            | -0.061                      | -1.294                                                     | -1.198                                                        | -0.058                                   |
| <b>1.070</b>            | <b>2.111</b>                                  | <b>3.282</b>                                     | <b>0.218</b>                | <b>0.482</b>                                               | <b>0.718</b>                                                  | <b>2.502</b>                             |
| <b>1.146</b>            | <b>1.837</b>                                  | <b>2.335</b>                                     | <b>1.014</b>                | <b>0.939</b>                                               | <b>0.793</b>                                                  | <b>1.764</b>                             |



|               |               |               |               |               |               |               |
|---------------|---------------|---------------|---------------|---------------|---------------|---------------|
| 1.045         | 1.408         | 1.589         | 1.417         | -0.274        | -0.191        | 0.210         |
| <b>1.801</b>  | <b>1.974</b>  | <b>2.620</b>  | <b>1.811</b>  | <b>-0.121</b> | <b>0.089</b>  | <b>0.849</b>  |
| 0.076         | 1.954         | 1.964         | -0.055        | -0.668        | -0.700        | 0.119         |
| 0.492         | 1.939         | 1.477         | 1.887         | -1.018        | -0.762        | -0.859        |
| <b>-1.623</b> | <b>-0.525</b> | <b>-0.632</b> | <b>-0.146</b> | <b>-0.480</b> | <b>-0.476</b> | <b>-0.715</b> |
| <b>0.991</b>  | <b>3.006</b>  | <b>3.102</b>  | <b>2.603</b>  | <b>0.042</b>  | <b>-0.030</b> | <b>-0.445</b> |
| -0.806        | 0.383         | 0.355         | 0.802         | 0.118         | 0.056         | -0.296        |
| <b>-0.091</b> | <b>1.226</b>  | <b>1.004</b>  | <b>1.666</b>  | <b>-0.702</b> | <b>-0.663</b> | <b>-0.658</b> |
| 0.558         | 1.520         | 1.365         | 1.594         | 0.863         | 0.731         | 0.713         |
| <b>1.221</b>  | <b>2.487</b>  | <b>2.116</b>  | <b>1.959</b>  | <b>-0.328</b> | <b>0.093</b>  | <b>0.400</b>  |
| <b>-0.429</b> | <b>0.295</b>  | <b>-0.675</b> | <b>-0.559</b> | <b>2.808</b>  | <b>2.845</b>  | <b>1.737</b>  |
| 0.144         | 1.161         | 0.559         | 0.806         | -0.124        | 0.273         | -0.068        |
| <b>-0.391</b> | <b>0.416</b>  | <b>0.359</b>  | <b>1.283</b>  | <b>-0.326</b> | <b>-0.344</b> | <b>-0.605</b> |
| <b>1.572</b>  | <b>1.991</b>  | <b>1.952</b>  | <b>1.946</b>  | <b>-0.210</b> | <b>-0.047</b> | <b>-0.107</b> |
| <b>0.272</b>  | <b>2.575</b>  | <b>1.616</b>  | <b>2.296</b>  | <b>-0.166</b> | <b>-0.075</b> | <b>-0.565</b> |
| 0.412         | 0.813         | 0.311         | 0.569         | 0.080         | -0.015        | 0.039         |
| <b>0.740</b>  | <b>2.661</b>  | <b>2.681</b>  | <b>3.226</b>  | <b>-0.520</b> | <b>-0.441</b> | <b>-0.601</b> |
| -1.015        | -0.893        | -0.849        | -1.000        | 0.453         | 0.771         | 0.375         |
| <b>0.846</b>  | <b>1.992</b>  | <b>1.816</b>  | <b>2.376</b>  | <b>0.389</b>  | <b>0.399</b>  | <b>-0.117</b> |
| <b>3.375</b>  | <b>5.895</b>  | <b>4.075</b>  | <b>3.495</b>  | <b>0.586</b>  | <b>0.794</b>  | <b>0.971</b>  |
| 0.092         | 0.325         | 0.505         | 0.754         | 0.207         | 0.502         | 0.336         |
| -0.693        | 0.096         | -0.253        | 0.060         | 0.459         | 0.520         | 0.267         |
| <b>-2.116</b> | <b>-0.395</b> | <b>-0.373</b> | <b>0.479</b>  | <b>-0.339</b> | <b>-0.526</b> | <b>-0.891</b> |
| -0.463        | 0.324         | 0.235         | 0.466         | 0.294         | 0.293         | 0.030         |
| -1.114        | -0.654        | -0.604        | -0.402        | 0.997         | 0.974         | 0.828         |
| <b>-1.476</b> | <b>-0.384</b> | <b>-0.448</b> | <b>0.055</b>  | <b>0.524</b>  | <b>0.675</b>  | <b>0.073</b>  |
| <b>0.926</b>  | <b>1.677</b>  | <b>1.058</b>  | <b>1.221</b>  | <b>-0.720</b> | <b>-0.405</b> | <b>-0.258</b> |
| -0.200        | 1.122         | 1.037         | 1.227         | 0.190         | 0.180         | -0.050        |
| 0.108         | 1.570         | 0.814         | 0.835         | -0.123        | 0.084         | 0.039         |
| 0.670         | 0.807         | 0.519         | 1.207         | 0.367         | 0.581         | 0.201         |
| <b>-1.423</b> | <b>-0.495</b> | <b>-0.708</b> | <b>0.112</b>  | <b>0.712</b>  | <b>0.444</b>  | <b>0.127</b>  |
| 0.445         | 0.894         | 0.589         | 0.515         | 0.096         | 0.263         | 0.037         |
| -0.917        | 0.176         | 0.181         | 0.569         | -0.230        | -0.024        | -0.489        |
| -0.597        | 0.278         | -0.064        | 0.127         | 1.107         | 1.038         | 0.561         |
| -0.092        | 0.689         | 0.275         | 0.385         | 0.293         | 0.560         | 0.545         |
| <b>1.481</b>  | <b>2.620</b>  | <b>1.938</b>  | <b>1.459</b>  | <b>0.638</b>  | <b>0.785</b>  | <b>0.800</b>  |
| 0.207         | 0.585         | 0.478         | 0.850         | 1.198         | 1.402         | 1.348         |
| 0.875         | 1.426         | 0.664         | 0.945         | 0.678         | 0.953         | 0.883         |
| 0.170         | 0.446         | 0.111         | 0.462         | 1.448         | 1.364         | 1.252         |
| -0.668        | -0.236        | -0.254        | 0.334         | 0.246         | 0.395         | 0.261         |
| 0.907         | 0.101         | -0.055        | 0.387         | 1.644         | 1.538         | 1.183         |
| -1.080        | -0.649        | -0.545        | -0.242        | 0.388         | 0.152         | -0.468        |
| -1.024        | -0.610        | -0.563        | -0.579        | 0.568         | 0.537         | 0.274         |
| -0.345        | -0.573        | -0.760        | -0.424        | 2.365         | 2.147         | 1.417         |
| -0.372        | 0.126         | 0.006         | 0.182         | 0.310         | 0.252         | 0.463         |
| <b>-0.242</b> | <b>0.165</b>  | <b>0.027</b>  | <b>0.255</b>  | <b>1.214</b>  | <b>1.272</b>  | <b>0.956</b>  |
| 0.825         | 1.769         | 1.383         | 1.111         | 1.652         | 1.750         | 1.418         |
| <b>-0.722</b> | <b>-0.787</b> | <b>-1.188</b> | <b>-1.189</b> | <b>3.316</b>  | <b>3.027</b>  | <b>1.908</b>  |
| 0.340         | 0.524         | 0.167         | 0.846         | 0.618         | 0.476         | 0.113         |
| <b>-1.347</b> | <b>-1.370</b> | <b>-1.499</b> | <b>-1.406</b> | <b>2.336</b>  | <b>2.147</b>  | <b>1.292</b>  |
| <b>-1.840</b> | <b>-1.415</b> | <b>-1.283</b> | <b>-1.511</b> | <b>0.197</b>  | <b>0.286</b>  | <b>-0.210</b> |
| <b>-1.268</b> | <b>-1.136</b> | <b>-1.206</b> | <b>-1.349</b> | <b>2.364</b>  | <b>2.852</b>  | <b>2.176</b>  |
| <b>-1.690</b> | <b>-1.064</b> | <b>-0.950</b> | <b>-0.899</b> | <b>0.560</b>  | <b>0.855</b>  | <b>0.463</b>  |

|               |               |               |               |               |               |               |
|---------------|---------------|---------------|---------------|---------------|---------------|---------------|
| <b>-0.923</b> | <b>-1.103</b> | <b>-1.032</b> | <b>-1.052</b> | <b>2.613</b>  | <b>2.459</b>  | <b>1.993</b>  |
| -0.452        | -0.127        | -0.081        | 0.419         | 1.248         | 1.695         | 1.233         |
| <b>0.603</b>  | <b>1.922</b>  | <b>0.087</b>  | <b>-0.013</b> | <b>2.690</b>  | <b>2.631</b>  | <b>2.562</b>  |
| -0.341        | 0.712         | 0.776         | 2.021         | -0.463        | -0.417        | -0.955        |
| 0.615         | 1.732         | 1.271         | 1.853         | 0.281         | 0.393         | 0.262         |
| <b>1.414</b>  | <b>2.972</b>  | <b>2.221</b>  | <b>2.759</b>  | <b>0.251</b>  | <b>0.579</b>  | <b>0.451</b>  |
| <b>1.069</b>  | <b>2.206</b>  | <b>1.162</b>  | <b>1.748</b>  | <b>0.032</b>  | <b>0.423</b>  | <b>0.598</b>  |
| <b>-1.683</b> | <b>-1.321</b> | <b>-1.505</b> | <b>-1.956</b> | <b>1.192</b>  | <b>1.555</b>  | <b>0.754</b>  |
| <b>-0.675</b> | <b>-0.303</b> | <b>-0.482</b> | <b>-0.596</b> | <b>-0.237</b> | <b>0.059</b>  | <b>-0.266</b> |
| <b>1.681</b>  | <b>2.476</b>  | <b>2.213</b>  | <b>2.420</b>  | <b>-0.287</b> | <b>0.105</b>  | <b>-0.299</b> |
| -1.206        | -1.071        | -0.912        | -1.580        | 0.986         | 1.048         | 0.753         |
| <b>-2.050</b> | <b>-1.471</b> | <b>-1.569</b> | <b>-2.029</b> | <b>2.216</b>  | <b>2.241</b>  | <b>1.932</b>  |
| <b>-1.371</b> | <b>0.492</b>  | <b>-0.054</b> | <b>1.601</b>  | <b>-0.823</b> | <b>-0.767</b> | <b>-1.481</b> |
| <b>-0.294</b> | <b>1.546</b>  | <b>1.240</b>  | <b>2.500</b>  | <b>-0.514</b> | <b>-0.594</b> | <b>-1.083</b> |
| <b>0.521</b>  | <b>1.664</b>  | <b>1.144</b>  | <b>1.244</b>  | <b>0.543</b>  | <b>0.759</b>  | <b>0.291</b>  |
| <b>-0.779</b> | <b>0.011</b>  | <b>-0.078</b> | <b>0.207</b>  | <b>-0.146</b> | <b>0.126</b>  | <b>-0.643</b> |
| <b>-1.453</b> | <b>-0.967</b> | <b>-0.853</b> | <b>-0.907</b> | <b>0.078</b>  | <b>0.262</b>  | <b>-0.070</b> |
| <b>0.057</b>  | <b>0.836</b>  | <b>0.222</b>  | <b>0.130</b>  | <b>0.014</b>  | <b>0.263</b>  | <b>0.646</b>  |
| 1.258         | 0.790         | 0.285         | 0.416         | 1.215         | 1.268         | 1.073         |
| <b>1.755</b>  | <b>3.065</b>  | <b>3.052</b>  | <b>3.130</b>  | <b>0.548</b>  | <b>0.631</b>  | <b>0.234</b>  |
| -1.447        | -0.621        | -0.508        | -0.526        | 0.937         | 1.007         | 0.535         |
| -0.365        | -0.063        | -0.398        | 0.113         | 0.658         | 0.901         | 0.593         |
| <b>-1.732</b> | <b>-0.721</b> | <b>-0.927</b> | <b>-0.822</b> | <b>0.733</b>  | <b>1.035</b>  | <b>0.433</b>  |
| -0.599        | 1.368         | 0.343         | 0.645         | -0.635        | -0.618        | -0.677        |
| <b>-1.994</b> | <b>-0.200</b> | <b>-0.782</b> | <b>-0.167</b> | <b>-0.532</b> | <b>-0.510</b> | <b>-0.844</b> |
| -0.402        | 0.807         | 0.785         | 1.027         | -0.521        | -0.374        | -0.320        |
| <b>-1.536</b> | <b>-0.702</b> | <b>-1.120</b> | <b>-0.740</b> | <b>1.217</b>  | <b>1.517</b>  | <b>0.606</b>  |
| <b>-1.468</b> | <b>-0.530</b> | <b>-0.668</b> | <b>-0.346</b> | <b>0.356</b>  | <b>0.322</b>  | <b>0.115</b>  |
| <b>-1.187</b> | <b>-0.403</b> | <b>-0.581</b> | <b>-0.457</b> | <b>0.535</b>  | <b>0.763</b>  | <b>0.499</b>  |
| -0.212        | 0.471         | 0.233         | 0.052         | 1.156         | 1.352         | 1.153         |
| 0.666         | 1.079         | 0.641         | 0.423         | 0.422         | 0.778         | 0.613         |
| 0.265         | 0.895         | 0.483         | 0.468         | 0.719         | 0.719         | 0.249         |
| <b>-0.040</b> | <b>-0.221</b> | <b>-0.192</b> | <b>-0.516</b> | <b>1.052</b>  | <b>0.986</b>  | <b>1.195</b>  |
| -0.923        | -0.887        | -1.063        | -1.251        | 1.905         | 1.937         | 1.525         |
| -0.314        | 0.102         | 0.061         | 0.422         | 1.118         | 0.775         | 0.688         |
| -0.705        | 0.515         | 0.097         | 0.231         | 0.382         | 0.710         | 0.290         |
| -0.067        | -0.397        | -0.331        | -0.392        | 1.378         | 1.607         | 1.473         |
| 0.131         | -0.025        | -0.321        | -0.337        | 0.818         | 0.961         | 0.970         |
| -0.856        | -0.451        | -0.383        | -0.161        | 0.548         | 0.662         | 0.274         |
| <b>0.137</b>  | <b>0.463</b>  | <b>0.260</b>  | <b>0.292</b>  | <b>1.229</b>  | <b>1.185</b>  | <b>0.654</b>  |
| -0.485        | -0.553        | -0.580        | -0.830        | 1.337         | 1.308         | 1.072         |
| <b>-1.207</b> | <b>-0.808</b> | <b>-0.660</b> | <b>-0.113</b> | <b>0.128</b>  | <b>0.260</b>  | <b>-0.079</b> |
| <b>-1.636</b> | <b>-0.316</b> | <b>-0.496</b> | <b>0.535</b>  | <b>-0.849</b> | <b>-1.088</b> | <b>-1.334</b> |
| <b>-1.117</b> | <b>-0.534</b> | <b>-0.272</b> | <b>-0.108</b> | <b>0.712</b>  | <b>0.746</b>  | <b>0.260</b>  |
| -0.195        | 0.051         | 0.145         | 0.302         | 0.821         | 0.655         | 0.695         |
| 0.360         | 0.177         | 0.095         | 0.575         | 1.511         | 1.630         | 0.993         |
| -0.795        | -0.042        | -0.217        | 0.289         | -0.188        | -0.092        | -0.213        |
| 0.407         | 0.757         | 0.642         | 0.278         | 1.089         | 1.011         | 0.680         |
| <b>-2.041</b> | <b>-1.423</b> | <b>-1.452</b> | <b>-1.429</b> | <b>1.401</b>  | <b>1.187</b>  | <b>0.685</b>  |
| <b>-1.243</b> | <b>-1.339</b> | <b>-1.134</b> | <b>-1.245</b> | <b>0.378</b>  | <b>0.367</b>  | <b>0.067</b>  |
| -0.346        | -0.457        | -0.334        | -0.399        | 0.479         | 0.580         | 0.312         |
| <b>-2.651</b> | <b>-1.489</b> | <b>-1.511</b> | <b>-0.864</b> | <b>0.844</b>  | <b>0.847</b>  | <b>0.291</b>  |
| <b>-1.004</b> | <b>-0.360</b> | <b>-0.370</b> | <b>0.367</b>  | <b>-0.176</b> | <b>-0.354</b> | <b>-0.643</b> |

|               |               |               |               |               |               |               |
|---------------|---------------|---------------|---------------|---------------|---------------|---------------|
| <b>-1.674</b> | <b>-1.197</b> | <b>-1.085</b> | <b>-0.814</b> | <b>-0.251</b> | <b>-0.013</b> | <b>-0.509</b> |
| -0.748        | -0.204        | -0.392        | 0.178         | 0.570         | 0.783         | 0.476         |
| 0.001         | -0.358        | -0.545        | -0.551        | 0.675         | 0.903         | 0.514         |
| -0.752        | -1.037        | -0.775        | -0.982        | 1.156         | 1.196         | 0.822         |
| -1.379        | -0.429        | -0.490        | 0.026         | -0.146        | 0.203         | -0.169        |
| <b>-0.844</b> | <b>0.632</b>  | <b>-0.153</b> | <b>0.047</b>  | <b>0.721</b>  | <b>0.884</b>  | <b>0.416</b>  |
| 0.931         | 1.897         | 1.657         | 1.480         | -1.457        | -0.990        | -0.875        |
| -0.783        | 0.374         | 0.577         | 1.025         | -0.207        | -0.267        | -0.217        |
| 0.821         | 1.522         | 0.948         | 0.696         | -0.613        | -0.049        | -0.195        |
| <b>-0.994</b> | <b>0.713</b>  | <b>0.597</b>  | <b>1.011</b>  | <b>-0.710</b> | <b>-0.423</b> | <b>-0.701</b> |
| <b>2.807</b>  | <b>3.641</b>  | <b>3.341</b>  | <b>2.981</b>  | <b>0.591</b>  | <b>0.603</b>  | <b>0.386</b>  |
| -0.039        | 0.381         | 0.313         | 0.416         | 0.430         | 0.684         | 0.489         |
| <b>-1.144</b> | <b>-0.355</b> | <b>-0.303</b> | <b>0.375</b>  | <b>0.494</b>  | <b>0.557</b>  | <b>0.297</b>  |
| <b>-2.358</b> | <b>-1.351</b> | <b>-1.162</b> | <b>-1.545</b> | <b>0.305</b>  | <b>0.689</b>  | <b>0.021</b>  |
| <b>0.793</b>  | <b>2.035</b>  | <b>0.828</b>  | <b>1.080</b>  | <b>0.242</b>  | <b>0.314</b>  | <b>0.384</b>  |
| -1.126        | -0.639        | -0.817        | -1.184        | 0.469         | 0.681         | 0.396         |
| -0.845        | 0.374         | 0.390         | 1.006         | -0.806        | -0.250        | -0.658        |
| <b>-1.148</b> | <b>0.646</b>  | <b>0.460</b>  | <b>0.658</b>  | <b>0.143</b>  | <b>0.162</b>  | <b>-0.071</b> |
| 0.290         | 1.232         | 0.942         | 1.315         | 0.021         | 0.151         | 0.134         |
| <b>0.129</b>  | <b>0.386</b>  | <b>0.081</b>  | <b>0.090</b>  | <b>0.748</b>  | <b>0.817</b>  | <b>0.916</b>  |
| <b>-0.934</b> | <b>-0.010</b> | <b>-0.666</b> | <b>0.176</b>  | <b>0.492</b>  | <b>0.747</b>  | <b>0.258</b>  |
| <b>3.185</b>  | <b>5.775</b>  | <b>5.310</b>  | <b>4.043</b>  | <b>0.327</b>  | <b>0.403</b>  | <b>0.103</b>  |
| -0.545        | -0.366        | -0.484        | -0.369        | 0.433         | 0.675         | 0.135         |
| 0.425         | -0.203        | -0.223        | -0.569        | 0.001         | 0.294         | 0.303         |
| -0.039        | 0.284         | 0.231         | 0.650         | -0.477        | -0.504        | -0.945        |
| -1.485        | -1.063        | -0.991        | -1.053        | -0.420        | -0.080        | -0.375        |
| <b>-1.489</b> | <b>-1.235</b> | <b>-1.254</b> | <b>-1.626</b> | <b>-0.081</b> | <b>0.535</b>  | <b>0.255</b>  |
| <b>4.355</b>  | <b>6.783</b>  | <b>4.087</b>  | <b>4.178</b>  | <b>-0.831</b> | <b>-0.393</b> | <b>-0.370</b> |
| -1.009        | -0.201        | -0.291        | 0.014         | -0.807        | -0.586        | -0.855        |
| -0.973        | 0.314         | -0.537        | -0.768        | 0.469         | 0.610         | 0.463         |
| 1.497         | 1.828         | 1.588         | 1.714         | -0.645        | -0.491        | -0.314        |
| -0.505        | -0.396        | -0.557        | -0.545        | 0.638         | 0.842         | 0.421         |
| 1.037         | 1.478         | 0.717         | 0.990         | 0.565         | 0.526         | 0.224         |
| -0.754        | -0.853        | -0.727        | -0.957        | -0.305        | -0.016        | -0.163        |
| -0.218        | 0.430         | 0.250         | 0.295         | 0.034         | 0.306         | -0.044        |
| <b>-1.425</b> | <b>-1.117</b> | <b>-1.106</b> | <b>-1.202</b> | <b>1.159</b>  | <b>1.156</b>  | <b>0.557</b>  |
| -0.473        | 0.060         | -0.168        | -0.178        | 0.134         | 0.294         | 0.070         |
| 0.025         | 0.060         | 0.018         | 0.002         | 0.469         | 0.297         | 0.029         |
| -0.469        | 0.039         | -0.257        | 0.227         | -0.335        | 0.027         | -0.170        |
| -1.028        | -0.319        | -0.577        | -0.385        | 0.290         | 0.383         | 0.117         |
| 0.154         | 0.116         | 0.121         | 0.546         | -0.415        | -0.426        | -0.614        |
| -0.973        | -1.168        | -1.018        | -0.779        | 1.221         | 1.441         | 0.785         |
| 0.718         | 0.369         | 0.547         | 0.766         | 1.012         | 1.028         | 1.035         |
| -1.146        | -1.360        | -1.043        | -1.126        | 0.964         | 0.935         | 0.385         |
| <b>-1.564</b> | <b>-0.574</b> | <b>-0.437</b> | <b>-0.101</b> | <b>-0.257</b> | <b>-0.146</b> | <b>-0.491</b> |
| 1.011         | 0.524         | 0.988         | 0.444         | 1.657         | 1.569         | 1.637         |
| <b>-1.046</b> | <b>-1.382</b> | <b>-1.321</b> | <b>-1.685</b> | <b>1.658</b>  | <b>1.656</b>  | <b>1.184</b>  |
| <b>1.439</b>  | <b>2.452</b>  | <b>2.111</b>  | <b>1.967</b>  | <b>0.067</b>  | <b>0.145</b>  | <b>0.220</b>  |
| -0.502        | 0.332         | 0.432         | 0.118         | 0.123         | 0.160         | 0.073         |
| -0.978        | -1.108        | -1.019        | -1.131        | 1.775         | 1.474         | 0.835         |
| -0.814        | -0.859        | -0.935        | -1.249        | 1.513         | 1.398         | 1.109         |
| <b>-1.493</b> | <b>-0.966</b> | <b>-1.032</b> | <b>-0.571</b> | <b>0.489</b>  | <b>0.353</b>  | <b>-0.150</b> |
| -1.312        | -1.063        | -0.926        | -0.912        | -0.268        | 0.227         | -0.294        |

|               |               |               |               |               |               |              |
|---------------|---------------|---------------|---------------|---------------|---------------|--------------|
| <b>-0.852</b> | <b>-0.761</b> | <b>-0.881</b> | <b>-1.185</b> | <b>0.626</b>  | <b>0.765</b>  | <b>0.602</b> |
| -1.560        | -1.179        | -1.045        | -0.996        | 0.581         | 0.637         | 0.282        |
| -0.847        | -0.438        | -0.353        | 0.082         | -0.815        | -0.578        | -1.035       |
| -0.654        | -0.355        | -0.312        | 0.361         | 0.352         | 0.184         | -0.210       |
| -1.212        | -0.737        | -0.801        | -0.714        | 0.764         | 0.807         | 0.279        |
| -0.273        | 0.787         | 0.559         | 1.176         | 0.046         | 0.164         | -0.044       |
| 0.883         | 2.134         | 1.346         | 1.862         | -0.704        | -0.241        | -0.587       |
| <b>-1.800</b> | <b>-1.501</b> | <b>-1.510</b> | <b>-1.970</b> | <b>0.924</b>  | <b>1.412</b>  | <b>0.518</b> |
| 0.449         | 1.803         | 1.463         | 1.456         | -0.226        | -0.103        | -0.124       |
| <b>4.020</b>  | <b>4.281</b>  | <b>4.390</b>  | <b>3.927</b>  | <b>0.386</b>  | <b>0.479</b>  | <b>0.738</b> |
| 0.507         | 0.910         | 1.001         | 1.361         | -0.292        | -0.166        | -0.508       |
| 0.790         | 2.047         | 1.729         | 1.706         | 0.322         | 0.324         | 0.613        |
| <b>1.704</b>  | <b>4.103</b>  | <b>3.824</b>  | <b>3.252</b>  | <b>0.209</b>  | <b>0.221</b>  | <b>0.491</b> |
| <b>1.497</b>  | <b>1.753</b>  | <b>1.133</b>  | <b>1.061</b>  | <b>1.879</b>  | <b>1.608</b>  | <b>1.875</b> |
| <b>0.647</b>  | <b>1.981</b>  | <b>1.872</b>  | <b>1.026</b>  | <b>-0.102</b> | <b>0.123</b>  | <b>0.104</b> |
| <b>1.184</b>  | <b>3.069</b>  | <b>2.451</b>  | <b>2.097</b>  | <b>0.011</b>  | <b>0.147</b>  | <b>0.195</b> |
| 0.046         | 1.053         | 0.990         | 1.695         | -0.358        | -0.349        | -0.635       |
| -1.333        | -1.078        | -0.936        | -1.320        | 0.493         | 0.581         | 0.367        |
| 0.752         | 1.609         | 1.658         | 1.494         | 0.562         | 0.696         | 0.379        |
| -0.207        | 0.687         | 0.560         | 0.507         | 0.838         | 1.046         | 0.827        |
| <b>3.281</b>  | <b>4.262</b>  | <b>3.967</b>  | <b>3.147</b>  | <b>0.541</b>  | <b>0.802</b>  | <b>1.182</b> |
| <b>0.167</b>  | <b>2.231</b>  | <b>1.062</b>  | <b>-0.018</b> | <b>1.110</b>  | <b>1.256</b>  | <b>1.024</b> |
| <b>1.563</b>  | <b>2.290</b>  | <b>1.485</b>  | <b>1.516</b>  | <b>0.960</b>  | <b>1.343</b>  | <b>1.403</b> |
| -1.088        | -1.209        | -1.188        | -1.530        | 1.106         | 1.307         | 0.975        |
| -0.437        | 0.644         | -0.108        | -0.223        | 0.618         | 0.902         | 0.491        |
| -1.123        | -0.601        | -0.341        | -0.263        | 0.174         | 0.377         | 0.190        |
| <b>3.623</b>  | <b>4.756</b>  | <b>2.970</b>  | <b>3.229</b>  | <b>-0.484</b> | <b>-0.171</b> | <b>0.370</b> |
| 0.301         | 0.387         | 0.453         | 0.585         | 0.061         | 0.543         | 0.188        |
| -1.360        | -1.081        | -1.101        | -1.198        | -0.051        | 0.206         | -0.109       |
| -0.035        | 1.304         | 1.233         | 0.691         | 0.510         | 0.463         | 0.481        |
| <b>1.547</b>  | <b>2.260</b>  | <b>2.285</b>  | <b>2.114</b>  | <b>1.489</b>  | <b>1.556</b>  | <b>1.237</b> |
| -0.446        | 0.377         | 0.458         | 0.467         | -0.214        | 0.361         | 0.083        |
| 0.269         | 0.008         | -0.468        | -0.715        | 0.641         | 0.819         | 0.729        |
| 0.774         | 1.122         | 0.873         | 1.098         | 0.241         | 0.696         | 0.258        |
| 0.242         | 0.091         | -0.149        | -0.540        | 1.030         | 1.419         | 1.014        |
| -0.774        | -0.711        | -0.850        | -0.821        | 0.295         | 0.365         | 0.223        |
| -0.085        | -0.078        | -0.300        | -0.475        | 0.883         | 1.068         | 0.734        |
| <b>-1.562</b> | <b>-1.292</b> | <b>-1.081</b> | <b>-1.404</b> | <b>1.237</b>  | <b>1.453</b>  | <b>0.978</b> |
| -0.489        | -0.276        | -0.409        | -0.222        | 0.897         | 0.929         | 0.598        |
| -1.042        | -0.840        | -1.050        | -1.385        | 0.630         | 0.752         | 0.492        |
| -0.997        | 0.280         | 0.203         | 0.462         | -0.068        | 0.225         | -0.045       |
| 0.996         | 1.598         | 0.719         | 1.185         | 1.234         | 1.209         | 0.904        |
| 0.123         | 0.111         | -0.020        | -0.075        | 0.973         | 1.283         | 0.744        |
| -0.024        | -0.695        | -0.456        | -0.802        | 1.608         | 1.838         | 1.238        |
| <b>-0.549</b> | <b>-1.163</b> | <b>-1.155</b> | <b>-1.630</b> | <b>3.032</b>  | <b>3.221</b>  | <b>2.504</b> |
| <b>-1.239</b> | <b>-1.181</b> | <b>-1.141</b> | <b>-1.561</b> | <b>1.638</b>  | <b>2.100</b>  | <b>1.618</b> |
| <b>-0.628</b> | <b>-0.989</b> | <b>-0.899</b> | <b>-1.460</b> | <b>2.186</b>  | <b>2.010</b>  | <b>1.922</b> |
| 1.085         | 1.490         | 1.015         | 0.896         | 1.117         | 0.958         | 0.890        |
| 0.117         | 0.084         | -0.036        | -0.129        | 1.695         | 1.743         | 1.261        |
| <b>0.594</b>  | <b>0.232</b>  | <b>-0.207</b> | <b>-0.408</b> | <b>1.697</b>  | <b>1.709</b>  | <b>2.154</b> |
| -0.525        | -0.769        | -0.910        | -1.278        | 1.539         | 1.591         | 1.174        |
| 0.403         | 0.904         | 0.165         | -0.166        | 0.715         | 0.556         | 0.504        |
| <b>-1.725</b> | <b>-1.669</b> | <b>-1.310</b> | <b>-1.616</b> | <b>0.726</b>  | <b>0.908</b>  | <b>0.260</b> |

|               |               |               |               |               |               |               |
|---------------|---------------|---------------|---------------|---------------|---------------|---------------|
| -1.135        | -0.913        | -0.656        | -0.539        | 0.832         | 0.909         | 0.514         |
| <b>-0.608</b> | <b>-0.713</b> | <b>-0.639</b> | <b>1.588</b>  | <b>-0.594</b> | <b>-0.505</b> | <b>-1.084</b> |
| -1.216        | -0.978        | -0.857        | -1.437        | -0.588        | -0.026        | -0.469        |
| -0.023        | 0.087         | -0.290        | -0.982        | 1.100         | 1.542         | 1.297         |
| -0.671        | 0.028         | 0.046         | 0.224         | 1.413         | 1.589         | 0.947         |
| 0.179         | -0.087        | -0.022        | -0.117        | 0.663         | 0.899         | 0.568         |
| 0.386         | 1.657         | 1.630         | 0.188         | -1.534        | -1.011        | -0.501        |
| <b>0.419</b>  | <b>-0.147</b> | <b>0.047</b>  | <b>0.070</b>  | <b>-0.268</b> | <b>-0.318</b> | <b>0.766</b>  |
| <b>-0.370</b> | <b>1.328</b>  | <b>1.362</b>  | <b>-1.657</b> | <b>2.196</b>  | <b>1.967</b>  | <b>2.334</b>  |
| 1.042         | 0.836         | 1.273         | 1.620         | 0.457         | 0.669         | 0.665         |
| <b>0.733</b>  | <b>1.459</b>  | <b>2.001</b>  | <b>0.001</b>  | <b>-0.309</b> | <b>0.032</b>  | <b>1.423</b>  |
| 0.388         | 1.692         | 2.357         | 0.527         | -0.352        | -0.491        | 0.578         |
| 1.020         | 0.525         | 0.973         | 0.140         | 1.204         | 1.114         | 2.589         |
| <b>1.769</b>  | <b>2.495</b>  | <b>3.466</b>  | <b>2.125</b>  | <b>-0.136</b> | <b>-0.046</b> | <b>1.557</b>  |
| -0.804        | -0.381        | -0.303        | -1.966        | 0.900         | 0.943         | 1.998         |
| <b>-0.622</b> | <b>-0.220</b> | <b>-0.104</b> | <b>-0.556</b> | <b>-0.419</b> | <b>-0.613</b> | <b>-0.512</b> |
| <b>1.959</b>  | <b>3.655</b>  | <b>3.747</b>  | <b>2.693</b>  | <b>-0.047</b> | <b>0.132</b>  | <b>0.765</b>  |
| -0.491        | -0.153        | -0.173        | 0.159         | 0.177         | 0.202         | 0.986         |
| 0.450         | 1.753         | 1.437         | 0.465         | 0.872         | 0.508         | 1.590         |
| <b>0.710</b>  | <b>3.357</b>  | <b>4.550</b>  | <b>0.440</b>  | <b>4.994</b>  | <b>4.898</b>  | <b>7.602</b>  |
| 0.956         | 1.623         | 2.206         | 1.783         | -0.205        | -0.139        | 1.750         |
| 0.755         | 0.805         | 0.990         | 1.000         | 0.775         | 0.901         | 2.013         |
| 0.879         | 0.913         | 1.448         | 1.892         | -0.422        | -0.344        | 0.212         |
| 0.749         | 0.941         | 1.441         | 1.381         | -0.101        | 0.079         | 0.073         |
| 0.649         | 0.807         | 0.586         | 0.387         | -0.409        | -0.208        | 0.498         |
| <b>1.907</b>  | <b>2.406</b>  | <b>2.513</b>  | <b>1.979</b>  | <b>-0.226</b> | <b>-0.120</b> | <b>0.006</b>  |
| <b>0.266</b>  | <b>-0.164</b> | <b>0.013</b>  | <b>-0.303</b> | <b>0.705</b>  | <b>0.679</b>  | <b>1.113</b>  |
| -0.541        | -0.292        | -0.151        | 0.167         | 1.119         | 1.017         | 0.823         |
| 0.855         | 1.157         | 1.395         | 0.571         | -0.647        | -0.345        | 0.812         |
| <b>-0.006</b> | <b>-0.145</b> | <b>0.126</b>  | <b>-0.064</b> | <b>3.634</b>  | <b>3.168</b>  | <b>3.287</b>  |
| 0.912         | 0.794         | 0.908         | 0.657         | 0.433         | 0.440         | 1.490         |
| 1.268         | 3.072         | 1.732         | 2.293         | -0.935        | -0.579        | 0.058         |
| 1.312         | 1.412         | 1.942         | 1.869         | -0.136        | -0.019        | 0.912         |
| 1.222         | 1.292         | 1.546         | 1.616         | -0.934        | -0.395        | -0.195        |
| -0.337        | -0.292        | -0.259        | -0.351        | -0.276        | -0.178        | -0.016        |
| 0.081         | -0.199        | -0.265        | 0.133         | 1.519         | 1.553         | 1.188         |
| -0.527        | -0.344        | -0.244        | -0.986        | -1.405        | -1.209        | -0.751        |
| 0.161         | 0.652         | 1.300         | 0.834         | 0.128         | 0.304         | 0.681         |
| -0.422        | -0.458        | -0.391        | -0.432        | 0.770         | 0.641         | 0.606         |
| <b>1.149</b>  | <b>5.138</b>  | <b>6.477</b>  | <b>3.806</b>  | <b>2.459</b>  | <b>2.043</b>  | <b>1.796</b>  |
| 0.091         | 0.065         | 0.423         | 0.459         | 0.222         | 0.193         | 0.142         |
| 0.565         | 1.051         | 1.134         | 0.926         | -0.002        | -0.004        | 1.080         |
| 0.300         | 0.640         | 0.932         | 0.425         | 1.613         | 1.514         | 1.759         |
| <b>1.551</b>  | <b>2.826</b>  | <b>4.051</b>  | <b>2.369</b>  | <b>-1.476</b> | <b>-1.165</b> | <b>-1.354</b> |
| <b>1.312</b>  | <b>2.888</b>  | <b>3.583</b>  | <b>1.709</b>  | <b>-1.264</b> | <b>-0.913</b> | <b>-0.358</b> |
| 0.156         | 0.326         | 0.158         | 0.040         | -0.895        | -0.558        | -0.203        |
| -0.183        | -0.156        | -0.197        | 0.098         | 0.312         | 0.577         | 0.754         |
| <b>0.422</b>  | <b>-0.569</b> | <b>-0.510</b> | <b>-0.032</b> | <b>2.635</b>  | <b>2.817</b>  | <b>3.344</b>  |
| -0.289        | -0.621        | -0.707        | -0.364        | 0.973         | 0.735         | 0.422         |
| <b>0.039</b>  | <b>-0.523</b> | <b>-0.417</b> | <b>-0.491</b> | <b>5.973</b>  | <b>5.250</b>  | <b>4.353</b>  |
| <b>-0.483</b> | <b>-0.374</b> | <b>-0.205</b> | <b>-0.882</b> | <b>0.793</b>  | <b>0.725</b>  | <b>1.350</b>  |
| -0.766        | -0.278        | -0.084        | -0.605        | 1.380         | 1.014         | 1.455         |
| 0.652         | 0.641         | 0.635         | 0.185         | 1.236         | 1.190         | 2.209         |

|               |               |               |               |               |               |               |
|---------------|---------------|---------------|---------------|---------------|---------------|---------------|
| -0.112        | -0.126        | -0.056        | 0.130         | 0.281         | 0.340         | 1.305         |
| 0.002         | -0.392        | -0.343        | 0.127         | -0.448        | 0.031         | 0.735         |
| 0.200         | 0.313         | 0.414         | 0.515         | -0.320        | -0.101        | 0.515         |
| <b>-0.484</b> | <b>-0.709</b> | <b>-0.925</b> | <b>-0.404</b> | <b>1.818</b>  | <b>1.811</b>  | <b>1.854</b>  |
| -0.421        | -0.086        | 0.254         | -0.091        | -0.644        | -0.431        | -0.518        |
| 0.120         | -0.278        | 0.111         | 0.029         | 1.193         | 1.017         | 1.299         |
| <b>-0.350</b> | <b>-0.734</b> | <b>-0.772</b> | <b>-0.426</b> | <b>4.046</b>  | <b>2.530</b>  | <b>1.830</b>  |
| <b>0.465</b>  | <b>0.140</b>  | <b>0.466</b>  | <b>0.248</b>  | <b>0.918</b>  | <b>0.957</b>  | <b>1.581</b>  |
| <b>0.653</b>  | <b>0.208</b>  | <b>0.186</b>  | <b>-0.114</b> | <b>-0.850</b> | <b>-0.739</b> | <b>-0.450</b> |
| -0.754        | -0.452        | -0.235        | -0.671        | -0.044        | 0.039         | 0.369         |
| -0.655        | -0.410        | -0.280        | -0.384        | 0.072         | 0.098         | 1.428         |

| TF Number of Vesicles (masked) | TF mode Area (volume weighted) | TF mode Area (mean int. weighted) | TF mode Area  | TF mode Mean intensity (volume weighted) | TF mode Mean intensity (mean int. weighted) | TF mode Mean intensity |
|--------------------------------|--------------------------------|-----------------------------------|---------------|------------------------------------------|---------------------------------------------|------------------------|
| 0.708                          | 1.157                          | 1.098                             | 0.812         | -0.108                                   | -0.402                                      | 1.917                  |
| 0.488                          | -1.365                         | -0.936                            | -1.132        | -0.004                                   | 0.000                                       | 0.000                  |
| <b>0.204</b>                   | <b>-1.259</b>                  | <b>-1.215</b>                     | <b>-1.469</b> | <b>0.662</b>                             | <b>0.736</b>                                | <b>0.501</b>           |
| 0.191                          | -0.164                         | 0.319                             | 0.371         | 0.132                                    | 0.201                                       | 0.108                  |
| 0.894                          | 1.523                          | 0.874                             | 0.930         | 1.675                                    | 1.827                                       | 1.132                  |
| -0.479                         | -0.137                         | 1.563                             | 0.447         | 1.922                                    | 1.821                                       | 0.898                  |
| 1.363                          | -1.526                         | -0.389                            | -0.841        | 1.381                                    | 1.160                                       | 1.505                  |
| -0.086                         | -1.612                         | -0.601                            | -0.325        | 2.889                                    | 3.306                                       | 0.835                  |
| -0.410                         | -1.486                         | -0.365                            | -0.628        | 4.073                                    | 4.083                                       | 0.201                  |
| <b>-0.338</b>                  | <b>0.410</b>                   | <b>0.873</b>                      | <b>1.031</b>  | <b>2.931</b>                             | <b>3.082</b>                                | <b>0.792</b>           |
| <b>-0.125</b>                  | <b>-1.352</b>                  | <b>0.689</b>                      | <b>-0.012</b> | <b>1.618</b>                             | <b>1.776</b>                                | <b>1.903</b>           |
| -0.993                         | -2.068                         | -1.899                            | -0.733        | 0.586                                    | 0.964                                       | -0.022                 |
| -1.197                         | -0.512                         | 0.769                             | 0.849         | -0.041                                   | 0.254                                       | -0.728                 |
| -1.036                         | -1.634                         | -0.244                            | -0.366        | 1.982                                    | 2.180                                       | 0.300                  |
| <b>-1.679</b>                  | <b>-0.782</b>                  | <b>-1.205</b>                     | <b>0.427</b>  | <b>-0.527</b>                            | <b>-0.417</b>                               | <b>-1.563</b>          |
| -0.115                         | -2.328                         | -0.879                            | -0.960        | 0.916                                    | 0.923                                       | 0.180                  |
| 0.354                          | -2.808                         | -1.188                            | -1.302        | 1.383                                    | 1.714                                       | 0.794                  |
| 0.029                          | -1.253                         | -2.035                            | -1.457        | 1.507                                    | 1.839                                       | -0.227                 |
| -1.004                         | -0.417                         | 0.839                             | 0.170         | 4.485                                    | 5.314                                       | 0.896                  |
| 0.687                          | -2.540                         | -2.254                            | -1.551        | 0.308                                    | 0.661                                       | -0.016                 |
| 0.717                          | -0.839                         | -0.706                            | -0.709        | -0.140                                   | -0.189                                      | -0.028                 |
| -1.009                         | 1.688                          | 3.476                             | 2.492         | 1.089                                    | 1.313                                       | 0.972                  |
| <b>-1.580</b>                  | <b>0.298</b>                   | <b>0.919</b>                      | <b>1.458</b>  | <b>-0.537</b>                            | <b>-0.403</b>                               | <b>-1.256</b>          |
| <b>-1.514</b>                  | <b>4.451</b>                   | <b>4.458</b>                      | <b>3.960</b>  | <b>-0.111</b>                            | <b>-0.295</b>                               | <b>-0.215</b>          |
| <b>-0.778</b>                  | <b>0.804</b>                   | <b>1.106</b>                      | <b>1.744</b>  | <b>0.005</b>                             | <b>0.370</b>                                | <b>-1.151</b>          |
| <b>-0.990</b>                  | <b>-1.249</b>                  | <b>1.602</b>                      | <b>1.357</b>  | <b>-0.868</b>                            | <b>-0.886</b>                               | <b>-0.612</b>          |
| <b>-1.745</b>                  | <b>-0.534</b>                  | <b>-0.588</b>                     | <b>0.258</b>  | <b>0.043</b>                             | <b>0.488</b>                                | <b>-0.978</b>          |
| -0.343                         | -0.534                         | -1.295                            | -0.712        | -0.253                                   | -0.228                                      | -0.671                 |
| <b>-4.425</b>                  | <b>1.264</b>                   | <b>-0.380</b>                     | <b>1.502</b>  | <b>1.570</b>                             | <b>2.124</b>                                | <b>-1.963</b>          |
| <b>-0.230</b>                  | <b>-0.304</b>                  | <b>-0.313</b>                     | <b>0.448</b>  | <b>0.453</b>                             | <b>0.586</b>                                | <b>0.015</b>           |
| <b>-0.678</b>                  | <b>0.863</b>                   | <b>0.161</b>                      | <b>0.397</b>  | <b>0.725</b>                             | <b>0.547</b>                                | <b>0.661</b>           |
| <b>-2.132</b>                  | <b>0.870</b>                   | <b>2.585</b>                      | <b>1.405</b>  | <b>0.060</b>                             | <b>0.006</b>                                | <b>-1.279</b>          |
| <b>-0.347</b>                  | <b>-0.348</b>                  | <b>-1.701</b>                     | <b>-0.855</b> | <b>-0.343</b>                            | <b>-0.583</b>                               | <b>-1.235</b>          |
| -1.637                         | 0.580                          | 0.979                             | -0.132        | -1.074                                   | -0.997                                      | -1.040                 |
| -1.281                         | 0.944                          | -0.111                            | 0.175         | -1.421                                   | -1.403                                      | -1.291                 |
| <b>-0.655</b>                  | <b>1.064</b>                   | <b>2.288</b>                      | <b>0.519</b>  | <b>-0.323</b>                            | <b>-0.713</b>                               | <b>0.405</b>           |
| -0.284                         | -1.207                         | -2.983                            | -1.424        | 0.556                                    | 1.016                                       | -0.308                 |
| -0.632                         | 1.898                          | 2.477                             | 2.717         | -0.499                                   | -0.352                                      | -0.062                 |
| <b>-0.488</b>                  | <b>0.717</b>                   | <b>1.560</b>                      | <b>2.010</b>  | <b>-0.005</b>                            | <b>-0.087</b>                               | <b>-0.225</b>          |
| 0.211                          | -1.535                         | -0.219                            | -0.921        | 0.741                                    | 0.804                                       | -0.138                 |
| <b>0.266</b>                   | <b>0.235</b>                   | <b>0.803</b>                      | <b>0.909</b>  | <b>6.225</b>                             | <b>5.924</b>                                | <b>0.778</b>           |
| -1.803                         | 0.821                          | 1.442                             | 2.040         | 1.617                                    | 1.802                                       | 1.424                  |
| <b>-2.753</b>                  | <b>-1.716</b>                  | <b>0.514</b>                      | <b>0.978</b>  | <b>1.862</b>                             | <b>2.214</b>                                | <b>0.059</b>           |
| 0.140                          | -1.913                         | 0.272                             | -0.818        | 1.800                                    | 2.096                                       | -0.023                 |
| <b>1.144</b>                   | <b>-3.159</b>                  | <b>-1.310</b>                     | <b>-0.885</b> | <b>3.265</b>                             | <b>3.544</b>                                | <b>0.983</b>           |
| <b>1.019</b>                   | <b>-1.268</b>                  | <b>0.245</b>                      | <b>-0.330</b> | <b>1.281</b>                             | <b>1.506</b>                                | <b>1.150</b>           |

|               |               |               |               |               |               |               |
|---------------|---------------|---------------|---------------|---------------|---------------|---------------|
| 0.113         | 1.064         | -1.007        | -0.450        | 1.228         | 1.299         | 1.195         |
| <b>0.618</b>  | <b>-0.624</b> | <b>1.250</b>  | <b>0.747</b>  | <b>1.246</b>  | <b>1.269</b>  | <b>1.697</b>  |
| -0.389        | 1.873         | 1.697         | 1.280         | 1.830         | 1.794         | 0.744         |
| 1.317         | 0.153         | 0.801         | 0.322         | 1.237         | 1.448         | 1.362         |
| <b>-0.632</b> | <b>-0.478</b> | <b>-0.599</b> | <b>-0.185</b> | <b>-1.019</b> | <b>-1.246</b> | <b>-1.482</b> |
| <b>1.389</b>  | <b>-0.411</b> | <b>-0.364</b> | <b>-1.145</b> | <b>0.926</b>  | <b>0.913</b>  | <b>1.054</b>  |
| 0.164         | -1.037        | -0.908        | -0.766        | -0.883        | -0.918        | -1.070        |
| <b>0.824</b>  | <b>-0.453</b> | <b>-0.532</b> | <b>-0.537</b> | <b>0.273</b>  | <b>0.155</b>  | <b>0.096</b>  |
| 0.626         | -0.500        | -0.502        | -1.296        | 0.594         | 0.582         | 0.792         |
| <b>0.948</b>  | <b>0.234</b>  | <b>0.212</b>  | <b>-0.118</b> | <b>1.291</b>  | <b>1.315</b>  | <b>1.140</b>  |
| <b>-1.597</b> | <b>7.205</b>  | <b>6.441</b>  | <b>6.067</b>  | <b>0.158</b>  | <b>-0.415</b> | <b>-1.385</b> |
| 0.875         | 0.222         | 0.728         | -0.146        | 1.670         | 1.746         | 1.570         |
| <b>-0.184</b> | <b>-0.298</b> | <b>-0.180</b> | <b>0.433</b>  | <b>-0.853</b> | <b>-0.800</b> | <b>-0.969</b> |
| <b>1.864</b>  | <b>-1.326</b> | <b>-0.597</b> | <b>-1.473</b> | <b>1.573</b>  | <b>1.912</b>  | <b>2.105</b>  |
| <b>0.319</b>  | <b>-0.028</b> | <b>0.409</b>  | <b>0.097</b>  | <b>0.403</b>  | <b>0.443</b>  | <b>0.155</b>  |
| 0.942         | -1.406        | -1.554        | -2.119        | 0.693         | 0.645         | 0.722         |
| <b>1.299</b>  | <b>-0.205</b> | <b>-0.176</b> | <b>-0.580</b> | <b>1.034</b>  | <b>0.978</b>  | <b>1.030</b>  |
| -0.216        | -1.203        | -1.240        | -0.306        | -1.258        | -1.373        | -1.729        |
| <b>0.175</b>  | <b>-0.013</b> | <b>0.513</b>  | <b>0.392</b>  | <b>0.433</b>  | <b>0.519</b>  | <b>0.288</b>  |
| <b>1.237</b>  | <b>0.489</b>  | <b>0.507</b>  | <b>-0.147</b> | <b>1.835</b>  | <b>2.062</b>  | <b>2.245</b>  |
| 0.920         | -0.580        | -0.868        | -1.326        | 0.312         | 0.375         | 0.466         |
| 0.082         | -0.659        | -1.054        | -0.809        | -0.676        | -0.730        | -0.909        |
| <b>-1.714</b> | <b>-2.679</b> | <b>-2.687</b> | <b>-0.793</b> | <b>-2.581</b> | <b>-2.705</b> | <b>-3.035</b> |
| 0.122         | -0.645        | -1.154        | -1.348        | -0.574        | -0.614        | -0.812        |
| -0.529        | -0.605        | -1.115        | -0.097        | -1.408        | -1.572        | -1.693        |
| <b>-1.438</b> | <b>-1.532</b> | <b>-1.733</b> | <b>-0.513</b> | <b>-1.900</b> | <b>-1.997</b> | <b>-2.274</b> |
| <b>0.425</b>  | <b>-2.059</b> | <b>-1.901</b> | <b>-2.301</b> | <b>0.753</b>  | <b>0.857</b>  | <b>0.701</b>  |
| -0.012        | 0.123         | -0.189        | -0.436        | -0.121        | -0.236        | -0.263        |
| 0.183         | -0.948        | -1.442        | -1.378        | -0.450        | -0.499        | -0.512        |
| -0.081        | 0.514         | 0.393         | 0.289         | 0.189         | 0.226         | 0.307         |
| <b>-1.467</b> | <b>2.072</b>  | <b>1.527</b>  | <b>2.252</b>  | <b>-1.363</b> | <b>-1.528</b> | <b>-1.826</b> |
| 0.371         | 0.288         | -0.039        | -0.184        | 0.171         | 0.124         | 0.094         |
| 0.079         | -1.153        | -1.121        | -0.747        | -1.089        | -1.132        | -1.273        |
| 0.153         | -0.950        | -1.787        | -1.217        | -0.879        | -0.961        | -0.948        |
| 0.671         | 0.392         | 0.116         | -0.036        | 0.335         | 0.351         | 0.451         |
| <b>1.009</b>  | <b>-0.263</b> | <b>-0.848</b> | <b>-1.645</b> | <b>0.877</b>  | <b>0.924</b>  | <b>1.344</b>  |
| -0.133        | 0.128         | 0.050         | 0.166         | -0.258        | -0.314        | -0.355        |
| -0.733        | 2.153         | 1.617         | 0.387         | 0.594         | -0.092        | -0.470        |
| 0.201         | 1.381         | 0.851         | 1.210         | -0.474        | -0.561        | -0.411        |
| -1.096        | 1.257         | 0.528         | 1.822         | -1.192        | -1.290        | -1.341        |
| -0.026        | -0.353        | -1.542        | -1.672        | 0.499         | 0.591         | 0.609         |
| 0.189         | -0.348        | -1.020        | -1.023        | -0.960        | -1.004        | -0.989        |
| -0.332        | 0.027         | -1.196        | -0.679        | -0.635        | -0.897        | -0.948        |
| -0.803        | 0.389         | -0.995        | 0.250         | -1.326        | -1.363        | -1.451        |
| 0.283         | 0.315         | -0.134        | -0.169        | 0.177         | 0.132         | 0.028         |
| <b>-0.886</b> | <b>3.159</b>  | <b>2.896</b>  | <b>4.197</b>  | <b>-0.927</b> | <b>-0.944</b> | <b>-1.047</b> |
| -0.856        | 1.740         | 1.211         | 1.992         | -0.101        | -0.007        | -0.122        |
| <b>-1.782</b> | <b>2.846</b>  | <b>1.278</b>  | <b>2.792</b>  | <b>-2.053</b> | <b>-2.248</b> | <b>-2.640</b> |
| -0.069        | 2.098         | 1.389         | 1.340         | 0.180         | 0.119         | 0.353         |
| <b>-1.977</b> | <b>1.773</b>  | <b>-0.777</b> | <b>1.123</b>  | <b>-2.401</b> | <b>-2.655</b> | <b>-3.001</b> |
| <b>-1.095</b> | <b>-0.825</b> | <b>-1.783</b> | <b>-0.062</b> | <b>-2.363</b> | <b>-2.489</b> | <b>-2.693</b> |
| <b>-2.810</b> | <b>1.180</b>  | <b>-0.490</b> | <b>0.734</b>  | <b>-2.524</b> | <b>-2.694</b> | <b>-3.144</b> |
| <b>-1.571</b> | <b>-0.484</b> | <b>-0.709</b> | <b>1.191</b>  | <b>-1.956</b> | <b>-2.060</b> | <b>-2.278</b> |



|               |               |               |               |               |               |               |
|---------------|---------------|---------------|---------------|---------------|---------------|---------------|
| <b>-2.285</b> | <b>4.850</b>  | <b>4.695</b>  | <b>7.574</b>  | <b>-1.764</b> | <b>-1.975</b> | <b>-2.283</b> |
| -1.502        | 1.447         | 1.216         | 3.108         | -1.410        | -1.472        | -1.695        |
| <b>-2.222</b> | <b>1.878</b>  | <b>1.071</b>  | <b>3.513</b>  | <b>-1.753</b> | <b>-1.819</b> | <b>-2.093</b> |
| 0.669         | 0.111         | 0.068         | -0.086        | -0.158        | -0.327        | -0.488        |
| 1.041         | 0.172         | -0.102        | -0.801        | 1.329         | 1.375         | 1.590         |
| <b>1.140</b>  | <b>0.580</b>  | <b>0.753</b>  | <b>0.592</b>  | <b>1.403</b>  | <b>1.337</b>  | <b>1.327</b>  |
| <b>0.841</b>  | <b>-0.291</b> | <b>-0.555</b> | <b>-0.469</b> | <b>0.787</b>  | <b>0.503</b>  | <b>0.416</b>  |
| <b>-0.876</b> | <b>-1.179</b> | <b>-1.647</b> | <b>-0.166</b> | <b>-2.141</b> | <b>-2.159</b> | <b>-2.430</b> |
| <b>0.645</b>  | <b>-1.057</b> | <b>-1.138</b> | <b>-0.735</b> | <b>-0.022</b> | <b>0.295</b>  | <b>0.056</b>  |
| <b>1.393</b>  | <b>-1.333</b> | <b>-1.515</b> | <b>-2.177</b> | <b>1.280</b>  | <b>1.226</b>  | <b>1.514</b>  |
| 0.426         | -1.013        | -1.075        | -0.513        | -0.319        | -0.255        | -0.410        |
| <b>-1.315</b> | <b>5.146</b>  | <b>2.793</b>  | <b>1.661</b>  | <b>0.688</b>  | <b>-1.231</b> | <b>-2.039</b> |
| <b>-0.768</b> | <b>0.215</b>  | <b>-0.210</b> | <b>0.900</b>  | <b>-1.330</b> | <b>-1.461</b> | <b>-1.643</b> |
| <b>0.235</b>  | <b>-0.693</b> | <b>-0.496</b> | <b>-0.019</b> | <b>-0.280</b> | <b>-0.409</b> | <b>-0.468</b> |
| <b>0.518</b>  | <b>-1.331</b> | <b>-1.360</b> | <b>-1.007</b> | <b>0.024</b>  | <b>0.160</b>  | <b>-0.146</b> |
| <b>0.418</b>  | <b>-0.606</b> | <b>-0.711</b> | <b>-0.574</b> | <b>-0.283</b> | <b>-0.353</b> | <b>-0.516</b> |
| <b>-1.471</b> | <b>-1.600</b> | <b>-2.184</b> | <b>-0.585</b> | <b>-1.820</b> | <b>-1.942</b> | <b>-2.319</b> |
| <b>0.136</b>  | <b>-0.211</b> | <b>-0.130</b> | <b>-0.162</b> | <b>0.236</b>  | <b>0.272</b>  | <b>0.048</b>  |
| -0.215        | -1.217        | -1.418        | -0.560        | -0.741        | -0.710        | -0.913        |
| <b>1.214</b>  | <b>-0.697</b> | <b>-0.345</b> | <b>-1.029</b> | <b>1.106</b>  | <b>1.051</b>  | <b>1.147</b>  |
| -0.375        | -1.181        | -0.975        | -0.581        | -0.757        | -0.712        | -0.967        |
| -1.083        | 1.261         | 0.591         | 0.804         | -0.437        | -0.685        | -1.037        |
| <b>-1.367</b> | <b>-1.173</b> | <b>-1.828</b> | <b>-0.110</b> | <b>-1.885</b> | <b>-1.947</b> | <b>-2.169</b> |
| -0.187        | -1.177        | -1.419        | -1.059        | -0.966        | -1.019        | -1.129        |
| <b>-1.467</b> | <b>-1.450</b> | <b>-1.744</b> | <b>0.161</b>  | <b>-2.305</b> | <b>-2.377</b> | <b>-2.701</b> |
| -0.057        | -0.462        | -1.086        | -0.738        | -0.891        | -1.028        | -1.226        |
| <b>-2.773</b> | <b>-1.472</b> | <b>-3.176</b> | <b>-1.670</b> | <b>-2.143</b> | <b>-2.557</b> | <b>-3.118</b> |
| <b>-0.893</b> | <b>-1.346</b> | <b>-1.728</b> | <b>-0.341</b> | <b>-1.868</b> | <b>-1.934</b> | <b>-2.157</b> |
| <b>-0.597</b> | <b>-1.241</b> | <b>-1.832</b> | <b>-0.824</b> | <b>-1.801</b> | <b>-1.915</b> | <b>-2.097</b> |
| -0.508        | -1.471        | -1.779        | -1.261        | -1.265        | -1.332        | -1.496        |
| -0.605        | 0.555         | 1.027         | 0.634         | 0.720         | 0.606         | 0.507         |
| 0.690         | -1.095        | -1.321        | -1.838        | 0.383         | 0.300         | 0.259         |
| <b>-0.349</b> | <b>-2.462</b> | <b>-3.442</b> | <b>-3.113</b> | <b>-1.124</b> | <b>-1.249</b> | <b>-1.459</b> |
| -0.765        | -0.676        | -1.515        | -0.147        | -1.281        | -1.220        | -1.420        |
| 0.058         | -1.094        | -1.508        | -1.584        | -0.688        | -0.754        | -0.766        |
| -0.622        | -0.266        | -0.726        | -0.573        | -0.744        | -0.853        | -0.958        |
| -0.596        | -0.640        | -1.322        | -0.474        | -1.032        | -1.094        | -1.258        |
| -0.264        | -0.195        | -1.192        | -0.347        | -1.013        | -0.964        | -1.027        |
| -0.296        | -0.627        | -1.116        | -0.405        | -1.257        | -1.359        | -1.409        |
| <b>-1.183</b> | <b>1.105</b>  | <b>0.695</b>  | <b>2.183</b>  | <b>-0.826</b> | <b>-0.930</b> | <b>-1.157</b> |
| -1.434        | -0.210        | -0.897        | 0.301         | -1.495        | -1.528        | -1.600        |
| <b>-1.105</b> | <b>0.207</b>  | <b>-0.484</b> | <b>1.158</b>  | <b>-2.050</b> | <b>-2.219</b> | <b>-2.473</b> |
| <b>-0.212</b> | <b>-1.341</b> | <b>-1.679</b> | <b>-0.754</b> | <b>-1.912</b> | <b>-2.073</b> | <b>-2.196</b> |
| <b>-1.768</b> | <b>-1.383</b> | <b>-1.909</b> | <b>-0.417</b> | <b>-2.163</b> | <b>-2.232</b> | <b>-2.497</b> |
| -0.167        | -0.200        | -0.619        | 0.398         | -1.315        | -1.357        | -1.378        |
| -0.501        | 1.779         | 0.976         | 1.561         | -0.791        | -0.899        | -1.114        |
| -0.673        | 0.900         | 0.436         | 1.979         | -1.119        | -1.174        | -1.147        |
| -0.460        | -0.344        | -0.003        | 0.107         | 0.767         | 0.473         | 0.442         |
| <b>-1.520</b> | <b>-0.183</b> | <b>-1.186</b> | <b>1.008</b>  | <b>-2.068</b> | <b>-2.138</b> | <b>-2.408</b> |
| <b>-1.258</b> | <b>-1.161</b> | <b>-1.856</b> | <b>-0.340</b> | <b>-2.044</b> | <b>-2.085</b> | <b>-2.199</b> |
| -0.131        | 1.486         | 0.848         | 1.387         | -1.053        | -1.205        | -1.264        |
| <b>-4.968</b> | <b>-4.763</b> | <b>-5.572</b> | <b>-2.100</b> | <b>-3.570</b> | <b>-3.746</b> | <b>-4.461</b> |
| <b>-0.718</b> | <b>-0.204</b> | <b>-0.883</b> | <b>0.358</b>  | <b>-1.647</b> | <b>-1.728</b> | <b>-1.812</b> |

|               |               |               |               |               |               |               |
|---------------|---------------|---------------|---------------|---------------|---------------|---------------|
| <b>-2.078</b> | <b>-1.395</b> | <b>-1.967</b> | <b>0.118</b>  | <b>-2.537</b> | <b>-2.603</b> | <b>-2.946</b> |
| -0.671        | -0.138        | -0.369        | 0.899         | -1.590        | -1.577        | -1.707        |
| -1.136        | -0.145        | -0.811        | 0.212         | -0.944        | -0.898        | -0.914        |
| -1.379        | 0.460         | -0.105        | 1.621         | -1.497        | -1.539        | -1.654        |
| -0.859        | -1.619        | -1.821        | -0.246        | -1.399        | -1.364        | -1.594        |
| <b>-0.891</b> | <b>0.055</b>  | <b>-0.170</b> | <b>0.672</b>  | <b>-1.264</b> | <b>-1.343</b> | <b>-1.521</b> |
| -0.239        | 0.035         | 0.358         | 0.147         | 0.981         | 0.897         | 0.739         |
| 0.729         | -0.513        | -0.201        | -0.306        | -0.141        | -0.311        | -0.413        |
| 0.873         | -0.372        | -0.735        | -1.107        | 0.842         | 0.844         | 0.988         |
| <b>-1.022</b> | <b>-1.594</b> | <b>-1.604</b> | <b>0.326</b>  | <b>-1.817</b> | <b>-1.834</b> | <b>-2.067</b> |
| <b>1.575</b>  | <b>-0.911</b> | <b>-0.921</b> | <b>-1.527</b> | <b>2.435</b>  | <b>2.644</b>  | <b>2.590</b>  |
| -0.450        | -0.303        | -0.634        | 0.437         | -0.791        | -0.923        | -1.264        |
| <b>-0.072</b> | <b>-0.861</b> | <b>-0.626</b> | <b>0.250</b>  | <b>-1.080</b> | <b>-1.204</b> | <b>-1.375</b> |
| <b>-2.114</b> | <b>-1.382</b> | <b>-1.834</b> | <b>0.633</b>  | <b>-2.578</b> | <b>-2.726</b> | <b>-3.084</b> |
| <b>0.876</b>  | <b>-0.749</b> | <b>-1.119</b> | <b>-1.653</b> | <b>0.800</b>  | <b>0.809</b>  | <b>0.875</b>  |
| -0.686        | -0.840        | -1.373        | -0.226        | -1.327        | -1.473        | -1.761        |
| -0.570        | -1.159        | -0.556        | 0.016         | -1.235        | -1.333        | -1.553        |
| <b>-0.608</b> | <b>-1.456</b> | <b>-1.292</b> | <b>-0.399</b> | <b>-1.410</b> | <b>-1.529</b> | <b>-1.746</b> |
| 0.025         | -0.886        | -0.872        | -0.484        | -0.781        | -0.788        | -0.870        |
| <b>0.188</b>  | <b>-1.753</b> | <b>-2.054</b> | <b>-1.566</b> | <b>-0.788</b> | <b>-0.760</b> | <b>-0.913</b> |
| <b>-1.123</b> | <b>-0.084</b> | <b>-0.164</b> | <b>1.324</b>  | <b>-1.507</b> | <b>-1.554</b> | <b>-1.649</b> |
| <b>0.965</b>  | <b>-0.103</b> | <b>0.112</b>  | <b>-0.455</b> | <b>1.067</b>  | <b>1.318</b>  | <b>1.403</b>  |
| 0.251         | -1.391        | -1.534        | -1.472        | 0.000         | 0.099         | 0.098         |
| -0.152        | -1.380        | -1.831        | -1.199        | -0.232        | -0.363        | -0.381        |
| 0.352         | 0.056         | -0.571        | -1.333        | 0.821         | 0.968         | 0.979         |
| -1.436        | -0.791        | -1.094        | 0.188         | -2.067        | -2.161        | -2.426        |
| <b>-1.186</b> | <b>-1.718</b> | <b>-1.763</b> | <b>-0.883</b> | <b>-1.666</b> | <b>-1.683</b> | <b>-1.913</b> |
| <b>1.385</b>  | <b>0.115</b>  | <b>-0.742</b> | <b>-1.728</b> | <b>3.483</b>  | <b>3.582</b>  | <b>3.881</b>  |
| 0.218         | -1.160        | -1.793        | -1.490        | -0.986        | -1.027        | -1.128        |
| -1.603        | -0.871        | -1.305        | -0.144        | -1.339        | -1.382        | -1.540        |
| 0.438         | -0.819        | -1.274        | -1.117        | -0.177        | -0.151        | 0.012         |
| -0.766        | 0.029         | 0.012         | 1.121         | -0.766        | -0.736        | -0.877        |
| 0.552         | 0.277         | -0.550        | -0.786        | 0.762         | 0.834         | 0.871         |
| -0.466        | -1.047        | -1.721        | -1.277        | -0.688        | -0.630        | -0.808        |
| 0.073         | -0.981        | -1.318        | -1.033        | -0.371        | -0.292        | -0.382        |
| <b>-1.436</b> | <b>-0.582</b> | <b>-1.241</b> | <b>0.153</b>  | <b>-2.047</b> | <b>-2.133</b> | <b>-2.348</b> |
| -0.118        | -1.388        | -1.807        | -1.263        | -1.004        | -1.023        | -1.113        |
| 0.539         | -1.027        | -1.543        | -1.913        | 0.023         | 0.005         | 0.128         |
| -0.432        | 0.136         | -0.124        | 0.829         | -1.390        | -1.553        | -1.642        |
| -1.365        | 0.612         | 0.311         | 2.069         | -1.762        | -1.891        | -2.187        |
| -0.419        | 1.321         | 0.772         | 1.473         | -0.196        | -0.216        | -0.460        |
| -2.009        | 1.583         | 1.399         | 4.264         | -1.918        | -1.979        | -2.236        |
| -0.414        | 1.168         | 0.494         | 1.122         | -0.907        | -0.910        | -0.805        |
| -1.268        | 0.264         | -0.320        | 1.034         | -1.682        | -1.839        | -1.861        |
| <b>-1.735</b> | <b>-0.573</b> | <b>-1.047</b> | <b>0.541</b>  | <b>-1.941</b> | <b>-2.056</b> | <b>-2.315</b> |
| -0.517        | -0.949        | -1.253        | -1.075        | -0.920        | -0.955        | -1.020        |
| <b>-2.107</b> | <b>4.090</b>  | <b>2.530</b>  | <b>3.120</b>  | <b>-1.104</b> | <b>-1.750</b> | <b>-2.281</b> |
| <b>0.511</b>  | <b>0.469</b>  | <b>-0.086</b> | <b>-0.062</b> | <b>0.738</b>  | <b>0.961</b>  | <b>0.948</b>  |
| -0.563        | 0.583         | 0.206         | 1.787         | -1.252        | -1.343        | -1.545        |
| -0.718        | 2.101         | 1.650         | 3.287         | -0.820        | -1.125        | -1.369        |
| -0.093        | -1.221        | -1.695        | -1.595        | -0.714        | -0.767        | -0.733        |
| <b>-1.623</b> | <b>2.246</b>  | <b>0.769</b>  | <b>4.104</b>  | <b>-2.053</b> | <b>-2.140</b> | <b>-2.374</b> |
| -1.855        | -1.834        | -1.859        | -0.590        | -1.851        | -1.906        | -2.045        |

|               |               |               |               |               |               |               |
|---------------|---------------|---------------|---------------|---------------|---------------|---------------|
| <b>-1.575</b> | <b>-0.345</b> | <b>-1.295</b> | <b>0.884</b>  | <b>-2.117</b> | <b>-2.140</b> | <b>-2.403</b> |
| -0.854        | -0.420        | -1.488        | -0.629        | -1.916        | -2.033        | -2.319        |
| 0.200         | -0.991        | -1.380        | -0.995        | -0.989        | -1.069        | -1.064        |
| -1.008        | -0.055        | -0.976        | -0.042        | -1.340        | -1.538        | -1.723        |
| -1.565        | 0.353         | 0.068         | 2.194         | -1.853        | -1.906        | -2.120        |
| 0.493         | -0.742        | -0.653        | -0.825        | 0.316         | 0.222         | 0.230         |
| 0.863         | 0.201         | 0.737         | 0.063         | 1.302         | 1.311         | 1.172         |
| <b>-1.292</b> | <b>-0.640</b> | <b>-1.233</b> | <b>0.984</b>  | <b>-2.100</b> | <b>-2.168</b> | <b>-2.368</b> |
| 0.506         | -1.120        | -1.146        | -1.295        | 0.145         | 0.230         | 0.350         |
| <b>1.706</b>  | <b>-0.617</b> | <b>-0.289</b> | <b>-1.352</b> | <b>1.796</b>  | <b>1.835</b>  | <b>2.126</b>  |
| 1.248         | -1.271        | -1.366        | -1.551        | 1.116         | 1.289         | 1.440         |
| 0.424         | -0.055        | -0.066        | -0.407        | 0.625         | 0.673         | 0.709         |
| <b>0.989</b>  | <b>-0.557</b> | <b>0.062</b>  | <b>-0.323</b> | <b>0.976</b>  | <b>1.194</b>  | <b>1.092</b>  |
| <b>1.288</b>  | <b>-0.421</b> | <b>-0.650</b> | <b>-1.089</b> | <b>1.538</b>  | <b>1.871</b>  | <b>1.922</b>  |
| <b>-0.165</b> | <b>-0.422</b> | <b>-0.488</b> | <b>-0.281</b> | <b>0.467</b>  | <b>0.457</b>  | <b>0.360</b>  |
| <b>0.805</b>  | <b>-0.518</b> | <b>-0.312</b> | <b>-0.556</b> | <b>1.700</b>  | <b>2.206</b>  | <b>1.806</b>  |
| 0.926         | -0.650        | -0.729        | -0.848        | 0.366         | 0.265         | 0.234         |
| -0.191        | -1.544        | -2.005        | -1.721        | -0.956        | -0.970        | -1.097        |
| 1.008         | -0.325        | 0.044         | -0.565        | 1.173         | 1.262         | 1.226         |
| -0.313        | -1.604        | -1.566        | -1.181        | -0.582        | -0.609        | -0.965        |
| <b>1.106</b>  | <b>-0.430</b> | <b>0.300</b>  | <b>-0.701</b> | <b>3.337</b>  | <b>3.692</b>  | <b>3.667</b>  |
| <b>-1.029</b> | <b>0.039</b>  | <b>0.409</b>  | <b>1.027</b>  | <b>-0.687</b> | <b>-0.708</b> | <b>-0.967</b> |
| <b>-0.460</b> | <b>0.198</b>  | <b>0.403</b>  | <b>-0.232</b> | <b>1.149</b>  | <b>1.146</b>  | <b>1.251</b>  |
| -0.463        | -1.273        | -1.703        | -0.516        | -1.259        | -1.308        | -1.342        |
| -0.051        | -1.549        | -1.981        | -1.603        | -0.662        | -0.682        | -0.713        |
| 0.006         | -1.698        | -2.220        | -1.433        | -1.373        | -1.501        | -1.591        |
| <b>1.331</b>  | <b>-1.646</b> | <b>-1.863</b> | <b>-2.671</b> | <b>2.879</b>  | <b>3.086</b>  | <b>3.534</b>  |
| 0.188         | -0.371        | -1.253        | -1.236        | -0.225        | -0.302        | -0.279        |
| -0.028        | -1.720        | -2.133        | -1.496        | -1.494        | -1.566        | -1.727        |
| 0.143         | 0.133         | -0.262        | 0.318         | -0.242        | -0.250        | -0.191        |
| <b>0.688</b>  | <b>0.385</b>  | <b>0.375</b>  | <b>0.022</b>  | <b>1.394</b>  | <b>1.704</b>  | <b>1.778</b>  |
| -0.625        | -1.123        | -1.295        | -0.662        | -1.214        | -1.250        | -1.314        |
| -0.875        | 0.067         | -0.133        | 0.667         | -0.758        | -0.765        | -0.743        |
| -0.017        | 0.463         | -0.132        | -0.075        | 0.977         | 0.886         | 0.780         |
| 0.432         | -1.320        | -1.832        | -1.797        | -0.359        | -0.396        | -0.389        |
| -1.145        | 2.154         | 0.886         | -0.033        | -0.656        | -1.392        | -1.821        |
| 0.302         | -1.031        | -1.324        | -0.947        | -0.283        | -0.286        | -0.440        |
| <b>-0.955</b> | <b>-1.239</b> | <b>-1.822</b> | <b>-0.935</b> | <b>-1.853</b> | <b>-1.986</b> | <b>-2.126</b> |
| -0.558        | 0.663         | -0.014        | 1.393         | -0.989        | -1.071        | -1.143        |
| -0.488        | -0.541        | -0.963        | 0.058         | -1.553        | -1.497        | -1.719        |
| -0.709        | 0.301         | -0.572        | 0.329         | -1.757        | -2.062        | -2.233        |
| -0.252        | 1.209         | 0.610         | 1.211         | 0.084         | 0.254         | 0.156         |
| -1.221        | 1.092         | 0.838         | 2.668         | -0.986        | -0.989        | -1.098        |
| -1.692        | 2.180         | 1.639         | 3.413         | -1.272        | -1.223        | -1.407        |
| <b>-1.032</b> | <b>1.071</b>  | <b>-0.107</b> | <b>1.580</b>  | <b>-1.325</b> | <b>-1.311</b> | <b>-1.374</b> |
| <b>-1.212</b> | <b>-0.223</b> | <b>-1.083</b> | <b>0.951</b>  | <b>-2.104</b> | <b>-2.218</b> | <b>-2.432</b> |
| <b>-1.954</b> | <b>-0.165</b> | <b>-1.371</b> | <b>0.732</b>  | <b>-2.382</b> | <b>-2.420</b> | <b>-2.668</b> |
| 0.657         | -0.317        | -0.272        | -1.031        | 1.204         | 1.279         | 1.345         |
| -0.023        | 0.038         | -0.420        | 1.153         | -1.015        | -1.094        | -1.026        |
| <b>-0.921</b> | <b>0.196</b>  | <b>-0.065</b> | <b>0.815</b>  | <b>-0.812</b> | <b>-0.812</b> | <b>-0.777</b> |
| -0.325        | -0.620        | -0.968        | -0.758        | -0.909        | -1.024        | -1.111        |
| 0.465         | -0.759        | -1.408        | -1.134        | 0.434         | 0.393         | 0.546         |
| <b>-1.356</b> | <b>1.030</b>  | <b>0.188</b>  | <b>2.716</b>  | <b>-2.079</b> | <b>-2.119</b> | <b>-2.337</b> |

|               |               |               |               |               |               |               |
|---------------|---------------|---------------|---------------|---------------|---------------|---------------|
| -0.210        | -0.966        | -1.590        | -1.382        | -1.170        | -1.323        | -1.459        |
| <b>-1.355</b> | <b>-1.561</b> | <b>-1.962</b> | <b>-0.217</b> | <b>-2.478</b> | <b>-2.575</b> | <b>-2.854</b> |
| -0.798        | -1.463        | -1.819        | -0.372        | -1.681        | -1.717        | -1.862        |
| -0.345        | -0.702        | -1.137        | -0.919        | -0.559        | -0.594        | -0.514        |
| -1.560        | 0.842         | -0.116        | 1.344         | -1.637        | -1.756        | -1.992        |
| -0.925        | 0.459         | 0.329         | 1.190         | -0.942        | -0.975        | -0.960        |
| -1.293        | 0.184         | 1.822         | 2.130         | 2.054         | 2.661         | 0.122         |
| <b>0.549</b>  | <b>-0.379</b> | <b>-2.545</b> | <b>-1.324</b> | <b>1.719</b>  | <b>2.050</b>  | <b>0.111</b>  |
| <b>-2.234</b> | <b>-2.261</b> | <b>-3.521</b> | <b>-0.615</b> | <b>1.833</b>  | <b>3.134</b>  | <b>-0.796</b> |
| -0.279        | -0.403        | -0.282        | -0.238        | 0.687         | 1.048         | 1.294         |
| <b>0.961</b>  | <b>-2.174</b> | <b>-1.487</b> | <b>-2.172</b> | <b>1.893</b>  | <b>1.867</b>  | <b>0.752</b>  |
| -0.223        | -1.709        | -0.854        | -0.605        | 3.171         | 3.399         | 0.316         |
| -0.133        | -1.830        | -1.866        | -1.331        | 1.685         | 1.860         | 0.544         |
| <b>-1.294</b> | <b>-1.358</b> | <b>0.668</b>  | <b>0.787</b>  | <b>3.345</b>  | <b>3.979</b>  | <b>1.054</b>  |
| -0.608        | 0.347         | 0.010         | 1.484         | 1.111         | 1.700         | -0.987        |
| <b>-2.751</b> | <b>-1.221</b> | <b>-1.368</b> | <b>-0.439</b> | <b>1.061</b>  | <b>1.706</b>  | <b>-0.947</b> |
| <b>1.587</b>  | <b>-2.134</b> | <b>-1.524</b> | <b>-1.221</b> | <b>1.612</b>  | <b>1.828</b>  | <b>2.250</b>  |
| -2.041        | -0.488        | -0.710        | 0.315         | 0.969         | 1.360         | -0.803        |
| -0.904        | -1.212        | -0.550        | -0.241        | 1.814         | 2.202         | 0.357         |
| <b>0.264</b>  | <b>-3.656</b> | <b>-1.334</b> | <b>-1.538</b> | <b>0.615</b>  | <b>1.025</b>  | <b>0.687</b>  |
| -1.379        | -1.819        | -1.906        | -0.945        | 1.327         | 1.640         | 1.071         |
| -0.663        | -1.967        | -1.455        | -0.920        | 2.880         | 3.322         | 1.086         |
| 0.149         | -1.161        | -0.271        | -0.360        | 2.472         | 2.259         | 1.046         |
| -1.782        | -0.773        | -0.012        | -0.595        | 2.138         | 2.507         | 0.272         |
| 0.277         | -1.180        | -1.835        | -1.454        | 0.855         | 1.154         | 1.173         |
| <b>0.415</b>  | <b>0.133</b>  | <b>0.626</b>  | <b>-0.359</b> | <b>1.033</b>  | <b>0.665</b>  | <b>1.436</b>  |
| <b>0.810</b>  | <b>-3.374</b> | <b>-3.655</b> | <b>-2.455</b> | <b>1.011</b>  | <b>1.373</b>  | <b>0.584</b>  |
| -0.171        | -0.881        | -1.402        | -0.966        | 0.099         | 0.134         | -0.637        |
| 0.261         | -3.550        | -3.974        | -2.622        | -0.588        | -0.276        | 1.182         |
| <b>0.629</b>  | <b>-2.796</b> | <b>-2.852</b> | <b>-1.830</b> | <b>0.331</b>  | <b>0.625</b>  | <b>-0.207</b> |
| 1.348         | -1.472        | -1.355        | -1.060        | -0.876        | -0.739        | 1.363         |
| 0.128         | -1.123        | -1.132        | -1.372        | -0.035        | 0.729         | 0.229         |
| 0.044         | -0.923        | 0.753         | 0.210         | 1.159         | 1.288         | 0.998         |
| -0.109        | -0.517        | -0.480        | -0.092        | -0.765        | -0.604        | 0.807         |
| 0.233         | -0.385        | -0.947        | -0.130        | -0.313        | -0.741        | -0.091        |
| -0.792        | 1.588         | 0.552         | 0.434         | 1.164         | 0.979         | 0.381         |
| -1.687        | -1.813        | -1.241        | 0.181         | -0.086        | 0.202         | -0.779        |
| 0.104         | -1.399        | 1.194         | 0.807         | 1.008         | 1.056         | 1.159         |
| 0.005         | -0.586        | -0.491        | -0.433        | -0.219        | 0.004         | -0.117        |
| <b>-0.730</b> | <b>-0.874</b> | <b>-2.168</b> | <b>-0.972</b> | <b>-0.791</b> | <b>-0.809</b> | <b>-0.928</b> |
| 1.262         | -2.427        | -1.556        | -1.733        | 1.591         | 1.354         | 0.906         |
| 0.703         | -1.613        | -0.924        | -1.351        | 0.159         | 0.129         | 0.956         |
| 0.121         | -0.180        | 0.313         | -0.578        | 1.746         | 1.759         | 0.360         |
| <b>-0.781</b> | <b>1.590</b>  | <b>1.046</b>  | <b>0.838</b>  | <b>2.628</b>  | <b>2.730</b>  | <b>0.930</b>  |
| <b>1.014</b>  | <b>0.425</b>  | <b>0.466</b>  | <b>0.328</b>  | <b>2.709</b>  | <b>2.652</b>  | <b>1.400</b>  |
| -0.845        | -0.187        | -0.218        | 0.269         | -0.629        | -0.516        | -0.162        |
| 0.236         | -0.261        | -0.291        | -0.414        | 1.131         | 1.202         | 0.330         |
| <b>-1.251</b> | <b>0.867</b>  | <b>1.264</b>  | <b>1.143</b>  | <b>-0.815</b> | <b>-0.909</b> | <b>-0.265</b> |
| -2.127        | 1.653         | 1.159         | 1.252         | 0.357         | 0.450         | -0.700        |
| <b>-1.096</b> | <b>-2.635</b> | <b>-1.752</b> | <b>-1.608</b> | <b>0.169</b>  | <b>0.403</b>  | <b>-0.715</b> |
| <b>-0.161</b> | <b>-2.225</b> | <b>-2.685</b> | <b>-1.328</b> | <b>0.741</b>  | <b>0.700</b>  | <b>-0.455</b> |
| -0.013        | -1.266        | -0.902        | -0.234        | -0.392        | -0.472        | -0.303        |
| -0.679        | -0.970        | -0.620        | -0.585        | -0.382        | -0.545        | 0.242         |

|               |               |               |               |               |               |               |
|---------------|---------------|---------------|---------------|---------------|---------------|---------------|
| -0.892        | 0.825         | 0.147         | 0.235         | 0.414         | 0.432         | -0.156        |
| -0.693        | -0.948        | -0.206        | 0.623         | 1.418         | 1.488         | -0.428        |
| 0.622         | -1.070        | -0.855        | -1.441        | 1.420         | 1.426         | 0.701         |
| <b>-1.943</b> | <b>1.085</b>  | <b>-0.216</b> | <b>0.992</b>  | <b>-1.292</b> | <b>-1.443</b> | <b>-1.492</b> |
| -2.010        | -1.464        | -2.009        | -0.088        | 0.103         | 0.180         | -1.033        |
| 0.359         | -0.763        | -0.630        | -1.026        | -0.280        | -0.241        | -0.185        |
| <b>-1.948</b> | <b>2.034</b>  | <b>1.112</b>  | <b>1.234</b>  | <b>0.733</b>  | <b>0.725</b>  | <b>-0.287</b> |
| <b>-0.916</b> | <b>2.605</b>  | <b>2.384</b>  | <b>1.322</b>  | <b>-0.678</b> | <b>-0.915</b> | <b>0.077</b>  |
| <b>-1.818</b> | <b>-2.255</b> | <b>-2.333</b> | <b>-1.807</b> | <b>1.465</b>  | <b>1.670</b>  | <b>-0.302</b> |
| -0.456        | -1.780        | -1.176        | -0.507        | 0.613         | 0.831         | -0.440        |
| -1.000        | -2.407        | -1.546        | -0.371        | -0.116        | 0.103         | -0.580        |

| TF mode<br>Integral<br>intensity<br>(volume<br>weighted) | TF mode<br>Integral<br>intensity<br>(mean int.<br>weighted) | TF mode<br>Integral<br>intensity | TF Dist. to<br>nuc. (volume<br>weighted  <br>nuc. size<br>normalized) | TF Dist. to<br>nuc. (mean<br>int. weighted<br>  nuc. size<br>normalized) | TF Dist. to<br>nuc. (nuc.<br>size<br>normalized) | TF/EGF co-<br>localization |
|----------------------------------------------------------|-------------------------------------------------------------|----------------------------------|-----------------------------------------------------------------------|--------------------------------------------------------------------------|--------------------------------------------------|----------------------------|
| 1.782                                                    | 1.460                                                       | 2.096                            | 1.506                                                                 | 1.232                                                                    | 0.418                                            | -3.661                     |
| 0.476                                                    | 0.248                                                       | -0.283                           | -0.499                                                                | -0.519                                                                   | -0.467                                           | 0.642                      |
| <b>0.823</b>                                             | <b>0.638</b>                                                | <b>0.363</b>                     | <b>-0.057</b>                                                         | <b>-0.191</b>                                                            | <b>0.306</b>                                     | <b>2.164</b>               |
| 0.426                                                    | 0.366                                                       | -0.091                           | 0.350                                                                 | 0.608                                                                    | 1.875                                            | 0.732                      |
| 0.564                                                    | 1.022                                                       | 1.188                            | 1.027                                                                 | 0.951                                                                    | 1.267                                            | 1.311                      |
| 0.966                                                    | 1.155                                                       | 0.892                            | 0.186                                                                 | 0.137                                                                    | -0.027                                           | -0.100                     |
| 1.062                                                    | 1.204                                                       | 1.168                            | 1.732                                                                 | 1.963                                                                    | 2.318                                            | -0.112                     |
| 0.912                                                    | 1.912                                                       | 0.776                            | 0.357                                                                 | 0.244                                                                    | 0.878                                            | 1.026                      |
| 1.339                                                    | 1.706                                                       | 0.132                            | -0.377                                                                | -0.026                                                                   | 0.389                                            | 2.986                      |
| <b>1.919</b>                                             | <b>2.158</b>                                                | <b>0.913</b>                     | <b>0.500</b>                                                          | <b>0.850</b>                                                             | <b>2.715</b>                                     | <b>2.846</b>               |
| <b>0.983</b>                                             | <b>1.437</b>                                                | <b>1.818</b>                     | <b>0.306</b>                                                          | <b>0.571</b>                                                             | <b>1.637</b>                                     | <b>-0.388</b>              |
| -1.192                                                   | -0.759                                                      | -0.130                           | -0.039                                                                | 0.213                                                                    | 0.557                                            | 1.278                      |
| -0.511                                                   | -0.804                                                      | -0.752                           | 0.299                                                                 | 0.560                                                                    | 0.588                                            | -0.876                     |
| 0.550                                                    | 1.965                                                       | 0.347                            | -0.604                                                                | -0.595                                                                   | 0.213                                            | 2.834                      |
| <b>-1.125</b>                                            | <b>-1.150</b>                                               | <b>-1.645</b>                    | <b>0.699</b>                                                          | <b>0.863</b>                                                             | <b>0.924</b>                                     | <b>-1.968</b>              |
| 0.250                                                    | 0.518                                                       | -0.160                           | -0.708                                                                | -0.679                                                                   | -0.136                                           | -0.699                     |
| 0.714                                                    | 1.055                                                       | 0.471                            | 1.383                                                                 | 1.424                                                                    | 1.851                                            | 0.803                      |
| 0.989                                                    | 0.870                                                       | -0.488                           | 1.357                                                                 | 1.622                                                                    | 2.274                                            | 0.367                      |
| 2.920                                                    | 4.640                                                       | 0.956                            | 0.675                                                                 | 0.875                                                                    | 1.375                                            | 0.442                      |
| -0.310                                                   | -0.053                                                      | -0.330                           | -0.585                                                                | -0.660                                                                   | -0.301                                           | -0.548                     |
| -0.458                                                   | -0.611                                                      | -0.308                           | 0.123                                                                 | 0.099                                                                    | 0.670                                            | -0.026                     |
| 0.866                                                    | 0.860                                                       | 1.202                            | -0.525                                                                | -0.507                                                                   | -0.425                                           | 0.880                      |
| <b>-1.375</b>                                            | <b>-1.365</b>                                               | <b>-1.262</b>                    | <b>2.167</b>                                                          | <b>2.513</b>                                                             | <b>2.808</b>                                     | <b>-1.584</b>              |
| <b>-0.312</b>                                            | <b>-0.116</b>                                               | <b>0.082</b>                     | <b>1.502</b>                                                          | <b>1.555</b>                                                             | <b>1.578</b>                                     | <b>-1.917</b>              |
| <b>-1.029</b>                                            | <b>-1.394</b>                                               | <b>-1.133</b>                    | <b>1.150</b>                                                          | <b>1.391</b>                                                             | <b>4.025</b>                                     | <b>-0.943</b>              |
| <b>-0.994</b>                                            | <b>-0.970</b>                                               | <b>-0.609</b>                    | <b>0.884</b>                                                          | <b>0.887</b>                                                             | <b>2.146</b>                                     | <b>-0.256</b>              |
| <b>-0.885</b>                                            | <b>-1.131</b>                                               | <b>-1.104</b>                    | <b>0.604</b>                                                          | <b>0.511</b>                                                             | <b>2.415</b>                                     | <b>-1.139</b>              |
| -0.017                                                   | -0.590                                                      | -0.867                           | 0.710                                                                 | 0.596                                                                    | 0.348                                            | -1.712                     |
| <b>2.465</b>                                             | <b>3.092</b>                                                | <b>-1.875</b>                    | <b>-0.827</b>                                                         | <b>-0.294</b>                                                            | <b>1.474</b>                                     | <b>1.807</b>               |
| <b>-0.382</b>                                            | <b>0.194</b>                                                | <b>-0.005</b>                    | <b>1.958</b>                                                          | <b>1.896</b>                                                             | <b>3.508</b>                                     | <b>-1.065</b>              |
| <b>-0.220</b>                                            | <b>-0.229</b>                                               | <b>0.525</b>                     | <b>2.063</b>                                                          | <b>2.077</b>                                                             | <b>4.029</b>                                     | <b>1.090</b>               |
| <b>-0.632</b>                                            | <b>-0.779</b>                                               | <b>-1.320</b>                    | <b>1.478</b>                                                          | <b>1.450</b>                                                             | <b>0.757</b>                                     | <b>-1.020</b>              |
| <b>-0.797</b>                                            | <b>-1.085</b>                                               | <b>-1.542</b>                    | <b>1.444</b>                                                          | <b>1.698</b>                                                             | <b>1.586</b>                                     | <b>-2.066</b>              |
| -0.197                                                   | -0.663                                                      | -1.182                           | 0.001                                                                 | -0.167                                                                   | -1.106                                           | -1.720                     |
| -1.093                                                   | -1.420                                                      | -1.467                           | 0.341                                                                 | 0.514                                                                    | -0.242                                           | -2.527                     |
| <b>0.153</b>                                             | <b>-0.044</b>                                               | <b>0.216</b>                     | <b>0.953</b>                                                          | <b>0.874</b>                                                             | <b>1.796</b>                                     | <b>-0.611</b>              |
| -0.329                                                   | -0.336                                                      | -0.442                           | 0.593                                                                 | 0.741                                                                    | 0.431                                            | -0.476                     |
| -0.851                                                   | -0.971                                                      | 0.111                            | 0.802                                                                 | 0.960                                                                    | 1.461                                            | -0.277                     |
| <b>-0.392</b>                                            | <b>-0.501</b>                                               | <b>-0.198</b>                    | <b>1.194</b>                                                          | <b>1.479</b>                                                             | <b>2.821</b>                                     | <b>-1.671</b>              |
| 1.018                                                    | 1.256                                                       | -0.440                           | 0.265                                                                 | 0.048                                                                    | -0.546                                           | -1.248                     |
| <b>2.948</b>                                             | <b>3.643</b>                                                | <b>0.951</b>                     | <b>-0.927</b>                                                         | <b>-0.574</b>                                                            | <b>0.680</b>                                     | <b>5.218</b>               |
| 1.459                                                    | 2.245                                                       | 1.738                            | -1.106                                                                | -1.216                                                                   | -0.390                                           | 0.927                      |
| <b>-0.178</b>                                            | <b>0.152</b>                                                | <b>0.214</b>                     | <b>-0.974</b>                                                         | <b>-1.077</b>                                                            | <b>-1.291</b>                                    | <b>-0.281</b>              |
| 1.146                                                    | 1.071                                                       | -0.255                           | -1.044                                                                | -0.996                                                                   | -0.155                                           | 1.129                      |
| <b>0.708</b>                                             | <b>1.495</b>                                                | <b>0.777</b>                     | <b>0.417</b>                                                          | <b>0.530</b>                                                             | <b>2.582</b>                                     | <b>3.291</b>               |
| <b>0.239</b>                                             | <b>0.964</b>                                                | <b>0.994</b>                     | <b>0.575</b>                                                          | <b>0.570</b>                                                             | <b>1.805</b>                                     | <b>1.359</b>               |

|               |               |               |               |               |               |               |
|---------------|---------------|---------------|---------------|---------------|---------------|---------------|
| 1.362         | 1.174         | 0.890         | 0.102         | 0.223         | 0.097         | 0.942         |
| <b>0.655</b>  | <b>0.785</b>  | <b>1.737</b>  | <b>0.176</b>  | <b>0.228</b>  | <b>1.684</b>  | <b>0.771</b>  |
| 1.313         | 1.205         | 0.850         | -0.393        | -0.474        | -0.261        | 1.642         |
| 1.942         | 1.801         | 1.599         | -0.778        | -0.555        | -0.552        | 0.739         |
| <b>-1.515</b> | <b>-1.250</b> | <b>-1.340</b> | <b>-0.800</b> | <b>-0.581</b> | <b>-0.441</b> | <b>-1.385</b> |
| <b>1.379</b>  | <b>0.888</b>  | <b>0.884</b>  | <b>-0.111</b> | <b>-0.223</b> | <b>-0.804</b> | <b>0.165</b>  |
| -1.285        | -1.075        | -1.145        | -0.254        | -0.041        | -0.240        | -0.129        |
| <b>0.283</b>  | <b>0.206</b>  | <b>0.088</b>  | <b>-1.029</b> | <b>-0.608</b> | <b>-0.441</b> | <b>1.079</b>  |
| 0.863         | 0.450         | 0.463         | 1.249         | 0.874         | 0.812         | 0.241         |
| <b>1.190</b>  | <b>1.390</b>  | <b>1.272</b>  | <b>0.227</b>  | <b>0.363</b>  | <b>0.696</b>  | <b>0.576</b>  |
| <b>2.416</b>  | <b>0.067</b>  | <b>0.042</b>  | <b>0.418</b>  | <b>0.576</b>  | <b>1.246</b>  | <b>6.048</b>  |
| 2.789         | 1.857         | 1.580         | 0.473         | 0.315         | -0.516        | 0.594         |
| <b>-1.002</b> | <b>-0.754</b> | <b>-0.864</b> | <b>-0.557</b> | <b>-0.618</b> | <b>-1.175</b> | <b>-1.127</b> |
| <b>2.075</b>  | <b>1.862</b>  | <b>1.682</b>  | <b>-0.186</b> | <b>-0.135</b> | <b>-0.348</b> | <b>0.846</b>  |
| <b>0.958</b>  | <b>0.322</b>  | <b>0.237</b>  | <b>-0.654</b> | <b>-0.454</b> | <b>-0.715</b> | <b>0.093</b>  |
| 0.807         | 0.337         | 0.293         | -0.539        | -0.515        | -0.336        | 2.242         |
| <b>1.357</b>  | <b>0.979</b>  | <b>1.020</b>  | <b>-0.458</b> | <b>-0.468</b> | <b>-0.959</b> | <b>-0.168</b> |
| -1.562        | -1.284        | -1.477        | -0.422        | -0.132        | 0.276         | 2.458         |
| <b>1.272</b>  | <b>0.896</b>  | <b>0.561</b>  | <b>-0.107</b> | <b>0.053</b>  | <b>-0.337</b> | <b>-0.659</b> |
| <b>2.657</b>  | <b>2.335</b>  | <b>2.351</b>  | <b>1.064</b>  | <b>1.246</b>  | <b>1.359</b>  | <b>2.699</b>  |
| 0.519         | 0.364         | 0.314         | 0.054         | 0.129         | 0.222         | 0.070         |
| -0.952        | -0.937        | -0.912        | 0.364         | 0.290         | 0.354         | -1.087        |
| <b>-3.517</b> | <b>-2.808</b> | <b>-3.068</b> | <b>-0.612</b> | <b>-0.543</b> | <b>-0.351</b> | <b>-4.241</b> |
| -0.667        | -0.885        | -1.026        | -0.357        | -0.304        | -0.071        | -0.274        |
| -1.924        | -1.578        | -1.597        | 0.745         | 0.942         | 1.202         | -1.520        |
| <b>-2.544</b> | <b>-2.093</b> | <b>-2.233</b> | <b>0.439</b>  | <b>0.670</b>  | <b>0.774</b>  | <b>-2.147</b> |
| <b>0.907</b>  | <b>1.028</b>  | <b>0.406</b>  | <b>-0.605</b> | <b>-0.416</b> | <b>0.177</b>  | <b>3.203</b>  |
| -0.132        | -0.205        | -0.273        | 0.064         | 0.332         | 0.590         | -1.124        |
| -0.776        | -0.793        | -0.663        | -0.467        | -0.364        | 0.207         | -0.124        |
| 0.805         | 0.188         | 0.480         | 0.314         | 0.255         | 0.019         | -0.338        |
| <b>-1.101</b> | <b>-1.248</b> | <b>-1.179</b> | <b>-0.991</b> | <b>-0.768</b> | <b>-0.318</b> | <b>-0.055</b> |
| 0.483         | 0.148         | 0.191         | -0.016        | 0.072         | 0.103         | 0.824         |
| -1.418        | -1.267        | -1.356        | 0.153         | 0.126         | -0.076        | -1.343        |
| -1.249        | -1.046        | -1.115        | 0.639         | 0.679         | 0.495         | -0.821        |
| 0.713         | 0.664         | 0.676         | 1.193         | 1.040         | 0.926         | -0.914        |
| <b>1.078</b>  | <b>0.773</b>  | <b>1.056</b>  | <b>1.076</b>  | <b>1.103</b>  | <b>1.090</b>  | <b>-0.018</b> |
| -0.081        | -0.262        | -0.207        | 1.354         | 1.631         | 2.188         | -0.375        |
| 0.814         | -0.184        | -0.012        | 0.363         | 0.753         | 1.350         | 2.361         |
| -0.049        | -0.380        | -0.226        | 0.783         | 0.803         | 1.024         | -0.346        |
| -1.068        | -1.087        | -0.805        | 0.239         | 0.560         | 0.916         | -0.841        |
| 0.482         | 0.290         | 0.370         | 0.644         | 0.580         | 0.568         | 0.749         |
| -1.286        | -1.235        | -1.145        | -0.219        | -0.411        | -0.820        | -1.438        |
| -0.820        | -1.119        | -0.989        | -0.012        | 0.031         | 0.102         | -1.364        |
| -1.216        | -1.347        | -1.201        | 1.020         | 0.854         | 1.371         | 0.142         |
| 0.384         | 0.036         | 0.020         | 0.639         | 0.353         | 0.182         | -0.794        |
| <b>-0.300</b> | <b>-0.490</b> | <b>-0.219</b> | <b>1.018</b>  | <b>0.993</b>  | <b>1.248</b>  | <b>-0.995</b> |
| 0.127         | 0.321         | 0.368         | 1.858         | 1.763         | 1.833         | -0.570        |
| <b>-2.339</b> | <b>-2.209</b> | <b>-2.174</b> | <b>0.305</b>  | <b>0.393</b>  | <b>0.978</b>  | <b>-0.406</b> |
| 0.621         | 0.244         | 0.887         | 0.408         | 0.263         | 0.011         | -0.797        |
| <b>-3.147</b> | <b>-2.804</b> | <b>-2.749</b> | <b>0.088</b>  | <b>0.117</b>  | <b>0.368</b>  | <b>-1.682</b> |
| <b>-2.954</b> | <b>-2.550</b> | <b>-2.572</b> | <b>0.157</b>  | <b>-0.132</b> | <b>0.018</b>  | <b>-3.589</b> |
| <b>-2.917</b> | <b>-2.837</b> | <b>-2.970</b> | <b>1.234</b>  | <b>1.460</b>  | <b>2.026</b>  | <b>-2.652</b> |
| <b>-2.382</b> | <b>-1.896</b> | <b>-1.945</b> | <b>0.959</b>  | <b>1.151</b>  | <b>1.184</b>  | <b>-3.056</b> |

|               |               |               |               |               |               |               |
|---------------|---------------|---------------|---------------|---------------|---------------|---------------|
| <b>-1.252</b> | <b>-1.511</b> | <b>-1.191</b> | <b>1.425</b>  | <b>1.354</b>  | <b>1.610</b>  | <b>-0.373</b> |
| -1.482        | -1.282        | -1.083        | 1.615         | 1.884         | 1.761         | -0.914        |
| <b>-1.399</b> | <b>-1.547</b> | <b>-1.342</b> | <b>0.879</b>  | <b>1.444</b>  | <b>2.529</b>  | <b>3.231</b>  |
| -0.141        | -0.296        | -0.415        | -0.769        | -0.688        | -0.851        | -1.472        |
| 2.606         | 1.277         | 1.495         | 0.184         | 0.290         | 0.169         | 0.332         |
| <b>1.445</b>  | <b>1.741</b>  | <b>1.718</b>  | <b>1.136</b>  | <b>1.137</b>  | <b>0.745</b>  | <b>0.632</b>  |
| <b>0.840</b>  | <b>0.590</b>  | <b>0.410</b>  | <b>-0.162</b> | <b>0.109</b>  | <b>0.543</b>  | <b>1.090</b>  |
| <b>-2.740</b> | <b>-2.218</b> | <b>-2.335</b> | <b>0.050</b>  | <b>-0.039</b> | <b>0.449</b>  | <b>-0.910</b> |
| <b>0.028</b>  | <b>0.527</b>  | <b>0.122</b>  | <b>-0.456</b> | <b>-0.226</b> | <b>-0.144</b> | <b>0.738</b>  |
| <b>1.101</b>  | <b>0.883</b>  | <b>0.988</b>  | <b>-0.061</b> | <b>-0.076</b> | <b>-0.227</b> | <b>-0.398</b> |
| -0.228        | 0.101         | -0.252        | 0.294         | 0.530         | 1.031         | 1.015         |
| <b>0.342</b>  | <b>-1.392</b> | <b>-1.569</b> | <b>-1.680</b> | <b>-1.216</b> | <b>0.539</b>  | <b>0.354</b>  |
| <b>-1.561</b> | <b>-1.320</b> | <b>-1.349</b> | <b>-1.331</b> | <b>-1.237</b> | <b>-1.954</b> | <b>-1.552</b> |
| <b>-0.345</b> | <b>-0.453</b> | <b>-0.377</b> | <b>-1.255</b> | <b>-1.020</b> | <b>-1.435</b> | <b>1.289</b>  |
| <b>0.143</b>  | <b>0.286</b>  | <b>-0.083</b> | <b>-0.341</b> | <b>-0.161</b> | <b>-0.377</b> | <b>3.499</b>  |
| <b>-0.086</b> | <b>-0.379</b> | <b>-0.370</b> | <b>-0.991</b> | <b>-0.988</b> | <b>-1.457</b> | <b>1.583</b>  |
| <b>-2.315</b> | <b>-2.119</b> | <b>-2.206</b> | <b>-0.935</b> | <b>-0.700</b> | <b>-0.263</b> | <b>-0.886</b> |
| <b>0.339</b>  | <b>0.324</b>  | <b>0.172</b>  | <b>-0.570</b> | <b>-0.127</b> | <b>0.137</b>  | <b>2.712</b>  |
| -0.652        | -0.609        | -0.772        | 0.300         | 0.647         | 1.301         | 6.138         |
| <b>1.316</b>  | <b>1.291</b>  | <b>0.998</b>  | <b>0.389</b>  | <b>0.645</b>  | <b>0.456</b>  | <b>0.720</b>  |
| -1.043        | -0.735        | -0.889        | 1.312         | 1.586         | 1.358         | -0.942        |
| 0.032         | -0.564        | -0.554        | -0.526        | -0.149        | 0.360         | 2.419         |
| <b>-2.238</b> | <b>-1.860</b> | <b>-1.989</b> | <b>0.666</b>  | <b>0.650</b>  | <b>1.323</b>  | <b>-1.478</b> |
| -1.185        | -1.197        | -1.253        | -0.710        | -0.586        | -0.429        | -1.655        |
| <b>-2.907</b> | <b>-2.429</b> | <b>-2.545</b> | <b>-1.040</b> | <b>-0.713</b> | <b>-0.493</b> | <b>-3.768</b> |
| -1.199        | -1.157        | -1.205        | -0.562        | -0.410        | 0.047         | 0.440         |
| <b>-3.243</b> | <b>-2.967</b> | <b>-3.162</b> | <b>-0.673</b> | <b>-0.535</b> | <b>0.295</b>  | <b>-0.987</b> |
| <b>-2.556</b> | <b>-1.926</b> | <b>-2.087</b> | <b>-0.108</b> | <b>0.011</b>  | <b>0.421</b>  | <b>-1.120</b> |
| <b>-2.422</b> | <b>-2.058</b> | <b>-2.127</b> | <b>0.209</b>  | <b>0.308</b>  | <b>1.175</b>  | <b>-2.416</b> |
| -1.663        | -1.485        | -1.579        | 0.682         | 0.911         | 1.319         | 0.276         |
| 1.841         | 0.606         | 0.814         | 0.138         | 0.372         | 0.765         | 2.396         |
| 0.562         | 0.298         | 0.080         | -0.094        | 0.076         | 0.337         | 2.111         |
| <b>-1.803</b> | <b>-1.653</b> | <b>-1.848</b> | <b>-0.027</b> | <b>0.216</b>  | <b>1.237</b>  | <b>2.907</b>  |
| -1.510        | -1.330        | -1.282        | 0.684         | 0.789         | 1.587         | -0.223        |
| -1.068        | -0.740        | -0.901        | -0.101        | -0.091        | 0.364         | 0.749         |
| -0.698        | -0.803        | -0.783        | 0.180         | 0.355         | 0.562         | 0.180         |
| -1.287        | -0.932        | -1.126        | 0.794         | 1.118         | 1.854         | 1.570         |
| -1.202        | -0.970        | -0.851        | -0.038        | 0.438         | 1.250         | 3.567         |
| -1.649        | -1.252        | -1.340        | 0.507         | 0.648         | 0.927         | -2.294        |
| <b>-0.763</b> | <b>-0.347</b> | <b>-0.438</b> | <b>0.086</b>  | <b>0.043</b>  | <b>0.746</b>  | <b>2.684</b>  |
| -1.892        | -1.542        | -1.375        | 0.131         | 0.318         | 0.850         | 0.906         |
| <b>-2.695</b> | <b>-2.167</b> | <b>-2.208</b> | <b>-0.073</b> | <b>0.125</b>  | <b>0.111</b>  | <b>-1.733</b> |
| <b>-2.622</b> | <b>-2.257</b> | <b>-2.277</b> | <b>-1.851</b> | <b>-1.940</b> | <b>-2.086</b> | <b>-2.708</b> |
| <b>-2.886</b> | <b>-2.250</b> | <b>-2.385</b> | <b>0.430</b>  | <b>0.705</b>  | <b>1.225</b>  | <b>-2.106</b> |
| -1.678        | -1.499        | -1.380        | 0.204         | 0.284         | -0.012        | -1.985        |
| -0.543        | -0.891        | -0.634        | 1.118         | 1.186         | 1.150         | 0.573         |
| -1.509        | -0.972        | -0.893        | 0.145         | 0.196         | 0.319         | -1.582        |
| 0.110         | 0.874         | 0.786         | 0.857         | 0.715         | 0.806         | 0.946         |
| <b>-2.498</b> | <b>-2.079</b> | <b>-2.090</b> | <b>0.168</b>  | <b>0.107</b>  | <b>0.533</b>  | <b>-2.822</b> |
| <b>-2.520</b> | <b>-2.057</b> | <b>-2.015</b> | <b>-0.359</b> | <b>-0.339</b> | <b>0.083</b>  | <b>-0.448</b> |
| -1.047        | -1.226        | -0.982        | 0.572         | 0.495         | 0.479         | -1.014        |
| <b>-4.788</b> | <b>-4.005</b> | <b>-4.640</b> | <b>-1.819</b> | <b>-1.736</b> | <b>-1.539</b> | <b>-4.687</b> |
| <b>-2.028</b> | <b>-1.729</b> | <b>-1.703</b> | <b>-0.470</b> | <b>-0.468</b> | <b>-0.531</b> | <b>-3.664</b> |



|               |               |               |               |               |               |               |
|---------------|---------------|---------------|---------------|---------------|---------------|---------------|
| <b>-3.181</b> | <b>-2.588</b> | <b>-2.760</b> | <b>-0.290</b> | <b>-0.310</b> | <b>-0.229</b> | <b>-3.226</b> |
| -1.901        | -1.447        | -1.474        | 0.083         | 0.027         | 0.003         | -1.728        |
| -0.866        | -0.691        | -0.488        | -0.106        | 0.197         | 0.959         | 0.260         |
| -1.780        | -1.408        | -1.310        | 0.258         | 0.238         | 1.048         | 0.531         |
| -1.606        | -1.202        | -1.381        | -0.492        | -0.248        | 0.306         | 0.900         |
| <b>-1.297</b> | <b>-1.178</b> | <b>-1.126</b> | <b>0.462</b>  | <b>0.559</b>  | <b>0.978</b>  | <b>0.580</b>  |
| 1.541         | 1.221         | 0.953         | -0.982        | -0.685        | -0.439        | 0.617         |
| -0.213        | -0.261        | -0.330        | -0.399        | -0.271        | -0.112        | -0.107        |
| 1.199         | 0.827         | 0.858         | -0.259        | -0.323        | -0.567        | -0.232        |
| <b>-2.341</b> | <b>-1.750</b> | <b>-1.868</b> | <b>-0.939</b> | <b>-0.861</b> | <b>-0.592</b> | <b>-0.980</b> |
| <b>3.250</b>  | <b>2.941</b>  | <b>2.492</b>  | <b>-0.121</b> | <b>0.156</b>  | <b>0.285</b>  | <b>3.665</b>  |
| -0.920        | -0.717        | -0.958        | -0.013        | 0.606         | 1.601         | 0.614         |
| <b>-1.417</b> | <b>-0.834</b> | <b>-1.092</b> | <b>0.063</b>  | <b>0.139</b>  | <b>0.171</b>  | <b>-2.588</b> |
| <b>-3.257</b> | <b>-2.652</b> | <b>-2.798</b> | <b>0.368</b>  | <b>0.460</b>  | <b>0.957</b>  | <b>-2.021</b> |
| <b>1.175</b>  | <b>0.589</b>  | <b>0.579</b>  | <b>-0.010</b> | <b>0.088</b>  | <b>0.687</b>  | <b>3.152</b>  |
| -1.788        | -1.362        | -1.610        | -0.736        | -0.221        | 0.303         | 1.463         |
| -1.741        | -1.425        | -1.487        | -0.199        | -0.104        | -0.016        | -2.356        |
| <b>-1.988</b> | <b>-1.542</b> | <b>-1.716</b> | <b>0.281</b>  | <b>0.329</b>  | <b>0.585</b>  | <b>-3.456</b> |
| -0.952        | -0.622        | -0.781        | 0.145         | 0.454         | 0.655         | -1.906        |
| <b>-1.121</b> | <b>-0.818</b> | <b>-0.930</b> | <b>-0.016</b> | <b>0.171</b>  | <b>1.154</b>  | <b>3.529</b>  |
| <b>-1.495</b> | <b>-1.015</b> | <b>-1.164</b> | <b>0.015</b>  | <b>0.329</b>  | <b>0.673</b>  | <b>0.287</b>  |
| <b>1.799</b>  | <b>1.532</b>  | <b>1.530</b>  | <b>0.424</b>  | <b>0.443</b>  | <b>0.233</b>  | <b>0.590</b>  |
| 0.045         | -0.034        | -0.023        | 0.166         | 0.148         | -0.018        | 1.043         |
| -0.547        | -0.355        | -0.369        | -0.989        | -0.689        | -0.094        | 2.148         |
| 1.501         | 0.788         | 0.899         | -0.883        | -0.839        | -0.898        | 0.555         |
| -2.581        | -2.204        | -2.249        | -0.583        | -0.233        | -0.067        | -1.477        |
| <b>-2.245</b> | <b>-1.567</b> | <b>-1.871</b> | <b>0.164</b>  | <b>0.547</b>  | <b>0.899</b>  | <b>0.010</b>  |
| <b>4.125</b>  | <b>3.734</b>  | <b>3.470</b>  | <b>-0.677</b> | <b>-0.622</b> | <b>-0.243</b> | <b>0.875</b>  |
| -1.365        | -1.158        | -1.250        | -0.666        | -0.733        | -0.831        | -0.888        |
| -1.544        | -1.238        | -1.210        | -0.347        | -0.254        | 0.981         | 1.154         |
| -0.210        | -0.026        | -0.219        | -0.165        | -0.296        | 0.042         | 0.015         |
| -0.311        | -0.282        | -0.327        | 0.255         | 0.346         | 0.893         | 1.771         |
| 1.157         | 0.646         | 0.806         | 0.285         | 0.192         | 0.497         | 1.241         |
| -0.776        | -0.826        | -0.838        | -0.418        | -0.425        | -0.026        | -0.611        |
| -0.247        | 0.048         | -0.257        | 0.047         | 0.159         | 0.299         | 0.264         |
| <b>-2.662</b> | <b>-2.147</b> | <b>-2.259</b> | <b>0.028</b>  | <b>0.203</b>  | <b>0.533</b>  | <b>-1.612</b> |
| -1.358        | -1.171        | -1.223        | 0.082         | 0.246         | 0.361         | -1.473        |
| 0.011         | -0.029        | -0.081        | -0.290        | -0.312        | -0.258        | 1.055         |
| -1.702        | -1.488        | -1.436        | -0.571        | -0.423        | -0.080        | -2.123        |
| -2.105        | -1.739        | -1.791        | -0.436        | -0.362        | 0.073         | -0.548        |
| 0.257         | 0.084         | -0.012        | -0.467        | -0.499        | -0.442        | 0.864         |
| -1.972        | -1.509        | -1.345        | 0.210         | 0.294         | 1.219         | -0.162        |
| -0.711        | -0.784        | -0.486        | 0.962         | 1.042         | 1.375         | -0.908        |
| -1.859        | -1.702        | -1.570        | -0.135        | -0.251        | 0.125         | -0.426        |
| <b>-2.596</b> | <b>-2.030</b> | <b>-2.100</b> | <b>-0.591</b> | <b>-0.471</b> | <b>-0.427</b> | <b>-3.372</b> |
| -1.212        | -0.979        | -1.129        | 1.719         | 1.816         | 1.578         | 0.334         |
| <b>-0.816</b> | <b>-1.624</b> | <b>-1.509</b> | <b>-0.610</b> | <b>-0.186</b> | <b>1.309</b>  | <b>3.321</b>  |
| <b>1.318</b>  | <b>0.924</b>  | <b>1.058</b>  | <b>0.196</b>  | <b>0.163</b>  | <b>0.579</b>  | <b>-0.514</b> |
| -1.446        | -1.099        | -1.192        | -0.027        | 0.151         | 0.553         | 0.278         |
| -0.366        | -0.809        | -0.651        | 0.886         | 0.594         | 0.655         | 0.902         |
| -1.156        | -0.967        | -0.869        | 0.267         | 0.420         | 0.847         | 1.171         |
| <b>-2.100</b> | <b>-1.740</b> | <b>-1.498</b> | <b>0.153</b>  | <b>-0.164</b> | <b>0.068</b>  | <b>0.059</b>  |
| -2.301        | -1.924        | -1.907        | -0.474        | -0.313        | -0.790        | -2.064        |

|               |               |               |               |               |               |               |
|---------------|---------------|---------------|---------------|---------------|---------------|---------------|
| <b>-2.479</b> | <b>-2.099</b> | <b>-2.124</b> | <b>-0.150</b> | <b>0.095</b>  | <b>0.885</b>  | <b>1.674</b>  |
| -2.353        | -2.240        | -2.244        | 0.410         | 0.529         | 0.606         | -1.764        |
| -1.367        | -1.139        | -1.184        | -1.149        | -1.198        | -1.531        | -2.259        |
| -1.740        | -1.489        | -1.606        | -0.315        | -0.238        | 0.011         | -0.953        |
| -2.125        | -1.636        | -1.577        | -0.091        | -0.117        | 0.385         | -1.183        |
| 0.323         | 0.250         | 0.239         | 0.178         | 0.358         | 0.636         | -0.311        |
| 2.007         | 1.486         | 1.328         | -0.156        | -0.097        | -0.098        | 1.204         |
| <b>-2.652</b> | <b>-2.060</b> | <b>-2.077</b> | <b>-0.096</b> | <b>-0.028</b> | <b>0.559</b>  | <b>-0.558</b> |
| 0.284         | 0.082         | 0.195         | 0.227         | 0.308         | 0.256         | -1.224        |
| <b>1.881</b>  | <b>1.760</b>  | <b>1.971</b>  | <b>0.342</b>  | <b>0.486</b>  | <b>0.789</b>  | <b>0.057</b>  |
| 1.317         | 1.518         | 1.382         | -1.047        | -0.841        | -0.593        | 0.497         |
| 1.179         | 0.805         | 0.807         | 0.523         | 0.570         | 1.008         | 0.260         |
| <b>1.997</b>  | <b>1.363</b>  | <b>1.073</b>  | <b>0.765</b>  | <b>0.882</b>  | <b>1.100</b>  | <b>1.433</b>  |
| <b>2.776</b>  | <b>2.404</b>  | <b>1.946</b>  | <b>0.902</b>  | <b>0.989</b>  | <b>1.928</b>  | <b>5.168</b>  |
| <b>0.726</b>  | <b>0.782</b>  | <b>0.683</b>  | <b>-0.277</b> | <b>-0.141</b> | <b>0.224</b>  | <b>2.248</b>  |
| <b>3.385</b>  | <b>2.477</b>  | <b>1.884</b>  | <b>-0.300</b> | <b>-0.075</b> | <b>0.526</b>  | <b>3.471</b>  |
| 0.293         | 0.219         | 0.063         | -0.775        | -0.601        | -0.471        | 0.934         |
| -1.205        | -0.938        | -1.151        | -0.156        | -0.051        | 0.593         | 0.612         |
| 1.424         | 1.494         | 1.108         | 0.642         | 0.587         | 0.253         | 0.201         |
| -1.187        | -0.771        | -0.855        | 0.511         | 0.676         | 1.387         | 1.364         |
| <b>4.113</b>  | <b>4.293</b>  | <b>3.482</b>  | <b>1.167</b>  | <b>1.285</b>  | <b>1.585</b>  | <b>1.239</b>  |
| <b>-0.318</b> | <b>-0.408</b> | <b>-0.501</b> | <b>0.916</b>  | <b>1.310</b>  | <b>2.174</b>  | <b>2.728</b>  |
| <b>1.693</b>  | <b>1.126</b>  | <b>1.156</b>  | <b>1.533</b>  | <b>1.497</b>  | <b>1.421</b>  | <b>0.347</b>  |
| -1.772        | -1.274        | -1.209        | 0.211         | 0.226         | 0.987         | 0.625         |
| -0.811        | -0.844        | -0.820        | 0.166         | 0.199         | 0.833         | 0.972         |
| -2.024        | -1.593        | -1.699        | 0.484         | 0.548         | 0.662         | -1.499        |
| <b>3.302</b>  | <b>2.876</b>  | <b>2.872</b>  | <b>-0.887</b> | <b>-0.663</b> | <b>0.458</b>  | <b>2.381</b>  |
| -0.556        | -0.432        | -0.375        | 0.333         | 0.362         | 0.285         | 0.156         |
| -2.009        | -1.693        | -1.764        | -0.834        | -0.553        | -0.088        | -0.324        |
| -0.038        | 0.043         | 0.091         | 0.414         | 0.389         | 0.949         | 1.372         |
| <b>2.368</b>  | <b>1.971</b>  | <b>2.025</b>  | <b>1.789</b>  | <b>1.568</b>  | <b>1.156</b>  | <b>0.471</b>  |
| -1.356        | -1.172        | -1.205        | -0.102        | 0.149         | 0.655         | 0.073         |
| -0.531        | -0.610        | -0.377        | 0.136         | 0.350         | 0.758         | 1.457         |
| 1.538         | 1.257         | 1.116         | 0.249         | 0.472         | 0.420         | 2.808         |
| -0.389        | -0.644        | -0.584        | 0.498         | 0.678         | 1.214         | 0.358         |
| -0.819        | -1.467        | -1.442        | -1.545        | -1.410        | -0.128        | 2.806         |
| -0.368        | -0.206        | -0.461        | 0.483         | 0.634         | 1.192         | 1.811         |
| <b>-2.444</b> | <b>-2.008</b> | <b>-2.077</b> | <b>0.140</b>  | <b>0.362</b>  | <b>1.139</b>  | <b>-0.618</b> |
| -0.756        | -0.647        | -0.654        | 0.068         | 0.362         | 0.944         | 1.977         |
| -1.506        | -1.501        | -1.444        | -0.189        | -0.041        | 0.935         | 2.033         |
| -2.333        | -2.082        | -2.099        | 0.100         | 0.124         | 0.704         | -2.211        |
| 0.674         | 0.401         | 0.733         | 0.629         | 0.748         | 1.053         | 1.794         |
| -0.878        | -0.556        | -0.330        | 0.630         | 0.687         | 1.040         | 1.795         |
| -1.010        | -0.746        | -0.570        | 0.680         | 0.989         | 1.467         | 1.025         |
| <b>-1.251</b> | <b>-1.311</b> | <b>-0.965</b> | <b>1.218</b>  | <b>1.424</b>  | <b>2.685</b>  | <b>0.449</b>  |
| <b>-2.610</b> | <b>-2.217</b> | <b>-2.170</b> | <b>0.672</b>  | <b>1.035</b>  | <b>1.978</b>  | <b>-1.935</b> |
| <b>-3.012</b> | <b>-2.539</b> | <b>-2.507</b> | <b>0.659</b>  | <b>0.847</b>  | <b>1.832</b>  | <b>1.519</b>  |
| 1.736         | 1.283         | 1.253         | 0.482         | 0.680         | 0.949         | 1.711         |
| -1.201        | -0.980        | -0.845        | 0.517         | 0.549         | 0.984         | -0.190        |
| <b>-0.847</b> | <b>-0.564</b> | <b>-0.533</b> | <b>0.966</b>  | <b>1.387</b>  | <b>2.245</b>  | <b>0.020</b>  |
| -1.053        | -1.051        | -1.071        | 0.494         | 0.423         | 0.994         | 1.214         |
| 0.825         | 0.443         | 0.667         | -0.141        | 0.051         | 0.542         | 1.789         |
| <b>-2.358</b> | <b>-1.974</b> | <b>-1.820</b> | <b>-0.094</b> | <b>-0.224</b> | <b>-0.068</b> | <b>-1.387</b> |

|               |               |               |               |               |               |               |
|---------------|---------------|---------------|---------------|---------------|---------------|---------------|
| -1.667        | -1.567        | -1.485        | 0.453         | 0.360         | 0.939         | -0.058        |
| <b>-3.199</b> | <b>-2.602</b> | <b>-2.723</b> | <b>-0.833</b> | <b>-0.884</b> | <b>-0.751</b> | <b>-4.185</b> |
| -2.130        | -1.742        | -1.788        | -1.085        | -0.866        | -0.625        | -1.352        |
| -0.582        | -0.695        | -0.543        | 0.551         | 1.007         | 1.600         | 0.812         |
| -1.759        | -1.798        | -1.689        | 1.389         | 1.230         | 1.298         | -1.712        |
| -1.001        | -0.933        | -0.650        | 0.374         | 0.498         | 0.516         | -0.147        |
| 0.590         | 0.886         | 0.297         | -1.346        | -1.161        | -0.353        | 3.553         |
| <b>0.598</b>  | <b>0.272</b>  | <b>-0.090</b> | <b>-0.970</b> | <b>-0.855</b> | <b>0.500</b>  | <b>3.508</b>  |
| <b>-0.142</b> | <b>0.177</b>  | <b>-0.916</b> | <b>0.881</b>  | <b>1.395</b>  | <b>2.716</b>  | <b>4.976</b>  |
| 0.770         | 1.068         | 1.132         | 0.754         | 0.944         | 0.656         | 1.333         |
| <b>0.607</b>  | <b>1.249</b>  | <b>0.332</b>  | <b>0.032</b>  | <b>0.112</b>  | <b>1.402</b>  | <b>2.336</b>  |
| 0.913         | 1.316         | 0.124         | -0.153        | -0.078        | 0.901         | 1.185         |
| 0.346         | 0.633         | 0.220         | 0.815         | 1.200         | 3.257         | 1.906         |
| <b>1.567</b>  | <b>2.462</b>  | <b>1.045</b>  | <b>0.099</b>  | <b>0.189</b>  | <b>1.990</b>  | <b>2.275</b>  |
| -0.524        | -0.306        | -0.943        | -0.274        | -0.061        | 2.128         | 2.286         |
| <b>-0.005</b> | <b>-0.026</b> | <b>-1.112</b> | <b>-1.242</b> | <b>-1.204</b> | <b>-0.490</b> | <b>1.603</b>  |
| <b>1.475</b>  | <b>1.897</b>  | <b>1.853</b>  | <b>0.187</b>  | <b>0.210</b>  | <b>0.971</b>  | <b>2.818</b>  |
| -0.600        | -0.663        | -0.872        | -0.193        | -0.010        | 1.276         | 0.592         |
| 0.793         | 0.827         | 0.236         | 0.209         | 0.294         | 2.042         | 1.838         |
| <b>-0.478</b> | <b>0.123</b>  | <b>0.434</b>  | <b>11.864</b> | <b>12.714</b> | <b>10.801</b> | <b>2.296</b>  |
| 0.174         | 0.949         | 0.951         | 0.035         | 0.173         | 2.013         | 0.253         |
| 0.872         | 1.641         | 0.992         | 0.076         | 0.201         | 1.925         | 3.683         |
| 2.814         | 2.844         | 0.757         | -0.034        | -0.020        | 0.632         | 0.136         |
| 2.443         | 3.660         | 0.131         | -0.206        | 0.124         | 0.571         | 0.925         |
| 0.350         | 0.922         | 0.925         | -0.739        | -0.891        | -0.148        | 3.111         |
| <b>1.168</b>  | <b>1.473</b>  | <b>1.225</b>  | <b>-0.355</b> | <b>-0.343</b> | <b>-0.471</b> | <b>0.654</b>  |
| <b>0.011</b>  | <b>0.344</b>  | <b>0.138</b>  | <b>-0.197</b> | <b>-0.113</b> | <b>0.625</b>  | <b>3.539</b>  |
| -0.464        | -0.385        | -0.853        | 0.645         | 0.724         | 1.349         | -1.445        |
| -0.755        | 0.058         | 0.718         | -0.589        | -0.820        | 0.282         | 2.002         |
| <b>-0.635</b> | <b>-0.573</b> | <b>-0.562</b> | <b>0.804</b>  | <b>0.903</b>  | <b>1.842</b>  | <b>-0.408</b> |
| -0.809        | -0.684        | 1.136         | 0.137         | 0.218         | 1.259         | 0.752         |
| 0.598         | 0.458         | 0.299         | -0.050        | -0.155        | 0.216         | 0.996         |
| 0.301         | 0.577         | 0.904         | 0.130         | -0.089        | 0.471         | 0.112         |
| -0.549        | -0.322        | 0.612         | -0.252        | -0.159        | 0.005         | -0.559        |
| -0.512        | -0.830        | -0.261        | -0.588        | -0.540        | -0.681        | -1.452        |
| 1.505         | 1.040         | 0.207         | 1.717         | 1.590         | 1.600         | -0.995        |
| -1.023        | -1.038        | -0.871        | -1.155        | -1.087        | -1.163        | -0.959        |
| 0.416         | 0.989         | 1.161         | 0.932         | 0.933         | 1.147         | 0.443         |
| -0.465        | -0.670        | -0.311        | 0.735         | 0.718         | 1.139         | -1.224        |
| <b>-1.134</b> | <b>-1.229</b> | <b>-1.153</b> | <b>1.682</b>  | <b>1.628</b>  | <b>2.470</b>  | <b>-2.456</b> |
| 0.774         | 0.832         | 0.535         | 0.564         | 0.260         | 0.216         | -0.387        |
| 0.148         | 0.417         | 0.627         | 0.007         | -0.019        | 1.044         | -0.636        |
| 0.934         | 1.045         | 0.081         | 0.897         | 0.966         | 2.310         | -0.005        |
| <b>1.659</b>  | <b>2.793</b>  | <b>1.049</b>  | <b>-0.916</b> | <b>-1.007</b> | <b>-0.912</b> | <b>0.183</b>  |
| <b>2.369</b>  | <b>2.491</b>  | <b>1.307</b>  | <b>-0.800</b> | <b>-0.937</b> | <b>-0.658</b> | <b>2.050</b>  |
| -0.204        | -0.327        | -0.253        | -0.591        | -0.682        | -0.683        | -0.732        |
| 0.563         | 0.589         | 0.156         | 0.487         | 0.645         | 1.008         | -0.219        |
| <b>-0.851</b> | <b>-0.828</b> | <b>-0.260</b> | <b>1.849</b>  | <b>1.841</b>  | <b>3.136</b>  | <b>-0.445</b> |
| 2.062         | 3.051         | -0.715        | 0.112         | -0.064        | -0.037        | 0.567         |
| <b>-0.774</b> | <b>-0.589</b> | <b>-1.022</b> | <b>1.993</b>  | <b>2.318</b>  | <b>2.793</b>  | <b>-1.224</b> |
| <b>-0.297</b> | <b>-0.651</b> | <b>-0.727</b> | <b>0.197</b>  | <b>-0.016</b> | <b>1.048</b>  | <b>-0.792</b> |
| -0.927        | -0.418        | -0.455        | 0.973         | 1.020         | 1.496         | -1.445        |
| -0.079        | -0.210        | 0.058         | 0.680         | 0.712         | 1.598         | -0.722        |

|               |               |               |               |               |               |               |
|---------------|---------------|---------------|---------------|---------------|---------------|---------------|
| -0.068        | -0.104        | -0.340        | 0.256         | 0.395         | 1.582         | -1.014        |
| -0.568        | 0.019         | -0.488        | -0.040        | -0.184        | 1.247         | 0.187         |
| 0.862         | 1.033         | 0.325         | -0.058        | -0.330        | -0.143        | -0.357        |
| <b>-1.547</b> | <b>-1.588</b> | <b>-1.591</b> | <b>1.388</b>  | <b>1.561</b>  | <b>2.085</b>  | <b>-1.883</b> |
| -0.810        | -1.062        | -1.135        | -0.282        | -0.453        | -0.574        | -1.393        |
| 0.306         | 0.026         | -0.495        | 0.951         | 0.849         | 1.983         | -0.933        |
| <b>0.096</b>  | <b>0.155</b>  | <b>-0.341</b> | <b>2.357</b>  | <b>2.289</b>  | <b>2.184</b>  | <b>-0.791</b> |
| <b>0.029</b>  | <b>-0.547</b> | <b>0.135</b>  | <b>0.492</b>  | <b>0.515</b>  | <b>0.999</b>  | <b>-1.543</b> |
| <b>0.038</b>  | <b>0.022</b>  | <b>-0.582</b> | <b>-0.553</b> | <b>-0.729</b> | <b>-0.926</b> | <b>2.382</b>  |
| -0.937        | -0.731        | -0.588        | -0.005        | -0.025        | 0.329         | -1.198        |
| -1.065        | -1.026        | -0.735        | 0.338         | 0.340         | 1.624         | 0.014         |

| EGF/TF co-localization |
|------------------------|
| -6.419                 |
| 1.241                  |
| <b>0.375</b>           |
| 0.055                  |
| 0.745                  |
| -0.016                 |
| -0.395                 |
| 0.217                  |
| -0.174                 |
| <b>0.455</b>           |
| <b>0.336</b>           |
| -0.834                 |
| -0.424                 |
| 0.185                  |
| <b>-2.441</b>          |
| -0.101                 |
| -0.132                 |
| 0.174                  |
| -0.453                 |
| -0.579                 |
| -0.499                 |
| 0.804                  |
| <b>-0.718</b>          |
| <b>-0.250</b>          |
| <b>-0.596</b>          |
| <b>-0.601</b>          |
| <b>-1.127</b>          |
| -0.715                 |
| <b>-1.699</b>          |
| <b>0.324</b>           |
| <b>1.035</b>           |
| <b>-1.405</b>          |
| <b>-1.734</b>          |
| -1.282                 |
| -1.872                 |
| <b>0.020</b>           |
| -0.343                 |
| 0.385                  |
| <b>-0.002</b>          |
| -0.588                 |
| <b>2.012</b>           |
| 0.734                  |
| <b>-1.999</b>          |
| 0.258                  |
| <b>1.803</b>           |
| <b>0.997</b>           |

|               |
|---------------|
| 0.390         |
| <b>1.119</b>  |
| 0.095         |
| 0.389         |
| <b>-1.941</b> |
| <b>0.595</b>  |
| -0.803        |
| <b>-0.021</b> |
| 0.338         |
| <b>0.894</b>  |
| <b>-0.132</b> |
| 0.519         |
| <b>-1.211</b> |
| <b>0.809</b>  |
| <b>-0.564</b> |
| 1.011         |
| <b>0.161</b>  |
| -1.188        |
| <b>-0.073</b> |
| <b>1.631</b>  |
| 0.304         |
| -0.635        |
| <b>-3.840</b> |
| 0.240         |
| -1.364        |
| <b>-2.297</b> |
| <b>1.357</b>  |
| -0.092        |
| 0.085         |
| 0.292         |
| <b>-1.764</b> |
| -0.037        |
| -0.617        |
| -0.812        |
| -0.103        |
| <b>1.504</b>  |
| 0.157         |
| 1.045         |
| 0.409         |
| -0.245        |
| 0.314         |
| -0.932        |
| -1.115        |
| -1.112        |
| 0.410         |
| <b>-0.016</b> |
| 0.925         |
| <b>-3.109</b> |
| -0.140        |
| <b>-3.504</b> |
| <b>-2.511</b> |
| <b>-3.535</b> |
| <b>-2.409</b> |

|               |
|---------------|
| <b>-1.355</b> |
| 0.080         |
| <b>0.136</b>  |
| -0.262        |
| 0.404         |
| <b>0.693</b>  |
| <b>0.537</b>  |
| <b>-3.207</b> |
| <b>-0.307</b> |
| <b>0.673</b>  |
| -0.321        |
| <b>-3.703</b> |
| <b>-2.641</b> |
| <b>-0.374</b> |
| <b>0.803</b>  |
| <b>-0.047</b> |
| <b>-2.206</b> |
| <b>0.243</b>  |
| 0.634         |
| <b>1.260</b>  |
| -1.563        |
| -0.297        |
| <b>-3.420</b> |
| -0.730        |
| <b>-3.705</b> |
| -0.341        |
| <b>-3.904</b> |
| <b>-2.098</b> |
| <b>-1.825</b> |
| -0.057        |
| 0.856         |
| 0.490         |
| <b>-0.004</b> |
| -2.127        |
| -0.305        |
| -0.293        |
| 0.384         |
| 0.444         |
| -1.713        |
| <b>-0.150</b> |
| 0.067         |
| <b>-1.250</b> |
| <b>-2.371</b> |
| <b>-1.428</b> |
| -0.564        |
| 0.503         |
| -0.476        |
| 0.844         |
| <b>-3.515</b> |
| <b>-1.270</b> |
| 0.267         |
| <b>-6.193</b> |
| <b>-1.804</b> |

|               |
|---------------|
| <b>-3.073</b> |
| -1.159        |
| -0.732        |
| -0.691        |
| -1.661        |
| <b>-1.650</b> |
| 0.665         |
| -0.326        |
| 0.790         |
| <b>-2.707</b> |
| <b>1.429</b>  |
| 0.057         |
| <b>-1.775</b> |
| <b>-3.136</b> |
| <b>0.642</b>  |
| -1.255        |
| -1.651        |
| <b>-2.264</b> |
| -0.596        |
| <b>0.324</b>  |
| <b>-2.074</b> |
| <b>1.306</b>  |
| -0.273        |
| -0.254        |
| 0.617         |
| -1.443        |
| <b>-1.773</b> |
| <b>1.789</b>  |
| -0.727        |
| -0.971        |
| 1.207         |
| -0.656        |
| 1.553         |
| -0.978        |
| -0.073        |
| <b>-2.229</b> |
| -0.316        |
| 0.376         |
| -1.102        |
| -1.538        |
| 1.025         |
| -0.856        |
| 0.553         |
| -0.853        |
| <b>-2.648</b> |
| 1.052         |
| <b>-0.671</b> |
| <b>1.120</b>  |
| 0.090         |
| -0.497        |
| -0.412        |
| <b>-2.091</b> |
| -1.868        |



|               |
|---------------|
| <b>-1.035</b> |
| -1.575        |
| -1.471        |
| -0.860        |
| -1.451        |
| -0.088        |
| 0.751         |
| <b>-3.220</b> |
| -0.089        |
| <b>1.142</b>  |
| -0.014        |
| 0.577         |
| <b>1.346</b>  |
| <b>0.946</b>  |
| <b>0.658</b>  |
| <b>0.740</b>  |
| 0.121         |
| -1.586        |
| 0.458         |
| 0.098         |
| <b>1.940</b>  |
| <b>0.240</b>  |
| <b>1.459</b>  |
| -1.140        |
| -0.578        |
| -1.020        |
| <b>1.550</b>  |
| 0.842         |
| -1.850        |
| 0.455         |
| <b>1.400</b>  |
| -0.890        |
| 0.599         |
| 1.107         |
| 0.517         |
| -0.315        |
| 0.190         |
| <b>-1.172</b> |
| -0.554        |
| -1.200        |
| -1.135        |
| 0.706         |
| 0.887         |
| 0.669         |
| <b>-1.129</b> |
| <b>-1.437</b> |
| <b>-0.534</b> |
| 1.729         |
| -0.158        |
| <b>0.444</b>  |
| -0.441        |
| 0.903         |
| <b>-1.422</b> |

|               |
|---------------|
| -0.415        |
| <b>-2.483</b> |
| -1.260        |
| 0.101         |
| -0.651        |
| -0.199        |
| 0.071         |
| <b>0.439</b>  |
| <b>0.222</b>  |
| 0.135         |
| <b>1.375</b>  |
| 0.214         |
| 0.723         |
| <b>0.814</b>  |
| -1.350        |
| <b>-0.895</b> |
| <b>0.830</b>  |
| -0.898        |
| 0.582         |
| <b>1.168</b>  |
| 0.157         |
| 0.540         |
| 0.013         |
| -0.489        |
| 0.849         |
| <b>0.696</b>  |
| <b>0.176</b>  |
| -1.749        |
| 0.720         |
| <b>-0.449</b> |
| 0.274         |
| -0.113        |
| 0.686         |
| 0.288         |
| -1.201        |
| 0.382         |
| -1.221        |
| -0.220        |
| -1.183        |
| <b>-5.131</b> |
| 0.128         |
| 0.041         |
| 0.134         |
| <b>0.422</b>  |
| <b>1.128</b>  |
| -0.209        |
| -0.315        |
| <b>0.697</b>  |
| -0.692        |
| <b>-1.160</b> |
| <b>-0.211</b> |
| -1.126        |
| 0.321         |

|               |
|---------------|
| -0.357        |
| 0.078         |
| 0.266         |
| <b>-1.370</b> |
| -1.251        |
| -0.371        |
| <b>-0.205</b> |
| <b>0.287</b>  |
| <b>0.752</b>  |
| -0.841        |
| -0.690        |

## Supplementary Table 4: Cluster Components with Top Rankings Bold

| <u>N.1</u>           | <u>N.2</u>          | <u>N.3</u>          | <u>N.4</u>          | <u>N.5</u>          | <u>N.6</u>          |
|----------------------|---------------------|---------------------|---------------------|---------------------|---------------------|
| IBS-101              | IBS-15              | IBS-100             | J443E               | IBS-35              | IBS-34              |
| IBS-102              | IBS-17              | IBS-11              | J447C               | IBS-36              | IBS-45              |
| IBS-103              | IBS-30              | IBS-16              | J453E               | IBS-41              | IBS-58              |
| IBS-104              | IBS-43              | IBS-46              | J454E               | IBS-42              | IBS-64              |
| IBS-105              | IBS-49              | J448E               | J500E               | IBS-44              | IBS-65              |
| IBS-106              | IBS-50              | J489Y               | J501E               | IBS-47              | J438Y               |
| IBS-107              | IBS-63              | J524Y               | J507Y               | IBS-56              | J502E               |
| IBS-2                | IBS-83              | <b><u>J530Y</u></b> | J515Y               | J491C               | J503E               |
| IBS-20               | J419E               | <b><u>J533Y</u></b> | J521Y               | J505Y               | J514E               |
| IBS-21               | J429E               | J534E               | J522E               | J511Y               | <b><u>J554Y</u></b> |
| IBS-23               | J460Y               | J547E               | <b><u>J525E</u></b> | <b><u>J538E</u></b> | J563Y               |
| IBS-24               | J462E               | J549E               | J528E               | J558E               | J565Y               |
| IBS-33               | J469Y               | <b><u>J550E</u></b> | J529E               | J616E               | J568E               |
| IBS-66               | <b><u>J473C</u></b> | <b><u>J555Y</u></b> | J531Y               | J617E               | <b><u>J573Y</u></b> |
| IBS-68               | J476S               | J557E               | J539C               | J619Y               | J585Y               |
| IBS-79               | <b><u>J479Y</u></b> | J594E               | <b><u>J551E</u></b> | J622Y               | J624E               |
| IBS-85               | J482C               | J597E               | J553E               | <b><u>J625E</u></b> | <b><u>J670Y</u></b> |
| <b><u>IBS-87</u></b> | J483C               | J598E               | J556Y               | J627E               | <b><u>J673Y</u></b> |
| IBS-95               | J486Y               | J604E               | J562Y               | <b><u>J629E</u></b> | J675Y               |
| IBS-96               | J495Y               | J606E               | J575Y               | J633E               | <b><u>J688Y</u></b> |
| IBS-97               | J497Y               | J609E               | J580Y               | J634E               | <b><u>J707Y</u></b> |
| IBS-98               | J508Y               | J612Y               | J590Y               | <b><u>J664Y</u></b> | KA-14               |
| J405S                | J509Y               | J621E               | J593C               | <b><u>J674Y</u></b> | KA-30               |
| J428E                | J510Y               | <b><u>J626Y</u></b> | J595E               | <b><u>J676Y</u></b> | KA-31               |
| J430E                | J513Y               | J635E               | J601Y               | <b><u>J677Y</u></b> | KA-32               |
| J431Y                | J532Y               | J649Y               | J610Y               | <b><u>J681Y</u></b> | KA-36               |
| J437Y                | J537E               | <b><u>J651E</u></b> | J637Y               | <b><u>J689Y</u></b> | KA-37               |
| J439S                | J540C               | J653Y               | <b><u>J684Y</u></b> | J690C               | KA-50               |
| J444C                | J541E               | <b><u>J655Y</u></b> | <b><u>J687Y</u></b> | KA-42               | KA-52               |
| J449E                | J542E               | <b><u>J656Y</u></b> | J705Y               | KA-53               |                     |
| J455Y                | J543Y               | <b><u>J661Y</u></b> | KA-13               |                     |                     |
| J459Y                | <b><u>J545Y</u></b> | <b><u>J663Y</u></b> |                     |                     |                     |
| J475E                | J546Y               | <b><u>J667Y</u></b> |                     |                     |                     |
| J477C                | J552E               | <b><u>J668Y</u></b> |                     |                     |                     |
| J478C                | J559S               | <b><u>J671Y</u></b> |                     |                     |                     |
| J480Y                | J560S               | <b><u>J678Y</u></b> |                     |                     |                     |
| J484C                | J561Y               | <b><u>J680Y</u></b> |                     |                     |                     |
| J485E                | J564Y               | <b><u>J682Y</u></b> |                     |                     |                     |
| J488Y                | J566E               | <b><u>J683Y</u></b> |                     |                     |                     |

|              |              |              |
|--------------|--------------|--------------|
| J494E        | J567E        | <u>J693Y</u> |
| J506Y        | J569E        | <u>J694Y</u> |
| J518Y        | J570E        | <u>J697Y</u> |
| J519Y        | J571E        | <u>J702Y</u> |
| J520Y        | J572E        | <u>J703Y</u> |
| J523E        | J576E        | <u>J714Y</u> |
| J536Y        | J577E        | J720Y        |
| J548Y        | J583E        | KA-3         |
| J578Y        | J586E        |              |
| J582C        | J588Y        |              |
| <u>J584E</u> | J591E        |              |
| <u>J589E</u> | J592C        |              |
| J596C        | <u>J600E</u> |              |
| J599E        | J603E        |              |
| J602E        | J608E        |              |
| J605Y        | J611Y        |              |
| <u>J607Y</u> | J613C        |              |
| J615E        | J614Y        |              |
| J623E        | <u>J620Y</u> |              |
| J636Y        | J628E        |              |
| J639E        | J631Y        |              |
| J640E        | J632E        |              |
| J641E        | J657E        |              |
| J643Y        | <u>J660Y</u> |              |
| <u>J644Y</u> | <u>J669Y</u> |              |
| J645E        | J672Y        |              |
| J646E        | J685Y        |              |
| <u>J647E</u> | J686Y        |              |
| J648E        | J715Y        |              |
| J650Y        | J719Y        |              |
| J652E        | KA-17        |              |
| J654Y        | KA-22        |              |
| J658E        | KA-33        |              |
| J659Y        | KA-34        |              |
| J662C        | KA-5         |              |
| <u>J665Y</u> | KA-7         |              |
| <u>J666Y</u> | KA-9         |              |
| J679Y        |              |              |
| <u>J692Y</u> |              |              |
| J696Y        |              |              |
| J698Y        |              |              |
| <u>J699Y</u> |              |              |

J700E

J704Y

J706Y

J708Y

J709Y

J710Y

J711Y

J712Y

J713Y

J718Y

**J775Y**

KA-10

KA-12

KA-2

KA-23

KA-24

KA-25

KA-26

KA-27

KA-28

KA-29

KA-38

KA-4

KA-6

Miltefosine

**Supplementary Table 5: Correlations of Endocytic Profiles to Genome-wide screen data**

| <b>J607Y (N.1)</b> |               |                    | <b>J775Y (N.1)</b> |               |                    | <b>J647E (N.1)</b> |               |                    | <b>Miltefosine</b> |
|--------------------|---------------|--------------------|--------------------|---------------|--------------------|--------------------|---------------|--------------------|--------------------|
| <u>GeneName</u>    | <u>GeneID</u> | <u>Correlation</u> | <u>GeneName</u>    | <u>GeneID</u> | <u>Correlation</u> | <u>GeneName</u>    | <u>GeneID</u> | <u>Correlation</u> | <u>GeneName</u>    |
| A26C3              | 23784         | -0.749289          | ABCA10             | 10349         | 0.745198           | A26C3              | 23784         | -0.807268          | AAAS               |
| ABAT               | 18            | -0.753595          | ABCA5              | 23461         | 0.736604           | AAMP               | 14            | 0.793863           | ABAT               |
| ABCA6              | 23460         | -0.761138          | ABHD4              | 63874         | 0.742372           | AATF               | 26574         | 0.728062           | ABCA10             |
| ABCA9              | 10350         | 0.716308           | ABL2               | 27            | 0.721471           | ABAT               | 18            | -0.801598          | ABLIM3             |
| ABCB11             | 8647          | -0.704316          | ABLIM3             | 22885         | 0.705356           | ABCA6              | 23460         | -0.773631          | ACRBP              |
| ABCC3              | 8714          | -0.754932          | ABTB2              | 25841         | 0.742521           | ABCA9              | 10350         | 0.759987           | ACTR1B             |
| ABI3               | 51225         | -0.707406          | ACRBP              | 84519         | -0.703062          | ABLIM3             | 22885         | 0.883493           | ADAM2              |
| ABLIM3             | 22885         | 0.801677           | ACTR1B             | 10120         | 0.79081            | ABRA               | 137735        | -0.706962          | ADCY4              |
| ACBD7              | 414149        | -0.729655          | ADAM2              | 2515          | 0.777128           | ACACB              | 32            | 0.724025           | AFF2               |
| ACOT6              | 641372        | 0.753541           | ADAMTS8            | 11095         | -0.701498          | ACOT11             | 26027         | 0.804954           | AGPAT5             |
| ACP5               | 54            | 0.768574           | ADC                | 113451        | 0.786271           | ACOT6              | 641372        | 0.864927           | AKAP9              |
| ACTR1B             | 10120         | 0.731499           | ADCY4              | 196883        | 0.76856            | ACP5               | 54            | 0.899097           | AKT2               |
| ACTR3              | 10096         | -0.703577          | ADCY9              | 115           | 0.827035           | ACSBG1             | 23205         | 0.70091            | ALDH1A2            |
| ACVRL1             | 94            | -0.704385          | AGPAT5             | 55326         | 0.805288           | ACSM1              | 116285        | 0.742268           | AMD1               |
| ADAMTS16           | 170690        | 0.707688           | AKR1A1             | 10327         | -0.711302          | ACTR1B             | 10120         | 0.852311           | ANGPTL1            |
| ADAMTS8            | 11095         | -0.715962          | AKT2               | 208           | 0.764096           | ADAM2              | 2515          | 0.720354           | ANKRD13C           |
| ADAT1              | 23536         | 0.776074           | ALDH1A2            | 8854          | 0.723117           | ADAM22             | 53616         | 0.741313           | APC                |
| ADCY2              | 108           | 0.738011           | ALDH1L2            | 160428        | 0.757695           | ADAMTS1            | 9510          | -0.70253           | APITD1             |
| ADH6               | 130           | 0.800205           | ALDH3A2            | 224           | 0.770742           | ADAMTS16           | 170690        | 0.855042           | ARF6               |
| ADM                | 133           | -0.800725          | AMD1               | 262           | 0.75041            | ADAMTS19           | 171019        | 0.800914           | ASB18              |
| AFF2               | 2334          | -0.886794          | ANGPTL1            | 9068          | 0.772705           | ADAMTS3            | 9508          | 0.823315           | ASNS               |
| AFG3L2             | 10939         | -0.707117          | ANKFY1             | 51479         | -0.751065          | ADAT1              | 23536         | 0.906489           | ATOX1              |
| AGBL5              | 60509         | -0.845151          | ANKIB1             | 54467         | -0.715973          | ADCY2              | 108           | 0.883841           | ATP1A2             |
| AGT                | 183           | 0.71092            | ANKRD19            | 138649        | 0.750171           | ADCY3              | 109           | 0.8095             | ATP2B3             |
| AIFM1              | 9131          | -0.720768          | ANKRD35            | 148741        | 0.797602           | ADCY8              | 114           | 0.779642           | AUH                |
| AKAP4              | 8852          | 0.766782           | APC                | 324           | 0.71159            | ADH6               | 130           | 0.826694           | AUP1               |
| AKAP9              | 10142         | 0.817062           | ARHGAP25           | 9938          | -0.759201          | ADNP2              | 22850         | 0.739558           | bA16L21.2.1        |
| AKR1CL2            | 83592         | -0.785763          | ARHGDIB            | 397           | 0.77267            | ADPRHL2            | 54936         | 0.765599           | BCL2L1             |
| AKT1               | 207           | 0.767643           | ARHGEF2            | 9181          | 0.771605           | AFF2               | 2334          | -0.799363          | BCL6B              |
| ALCAM              | 214           | 0.73389            | ASNS               | 440           | 0.709695           | AFG3L2             | 10939         | -0.708364          | BCMO1              |
| ALDH1A2            | 8854          | 0.772244           | ASPSCR1            | 79058         | -0.752233          | AGA                | 175           | 0.76863            | BCR                |
| ALKBH4             | 54784         | 0.744419           | ATOX1              | 475           | 0.747189           | AGBL4              | 84871         | 0.78427            | BDH2               |
| ALOXE3             | 59344         | 0.716551           | ATP1A2             | 477           | 0.807746           | AGPAT2             | 10555         | 0.763205           | BNC2               |
| AMPD2              | 271           | 0.715102           | ATP4A              | 495           | 0.700036           | AGT                | 183           | 0.72461            | BPNT1              |
| AMT                | 275           | 0.702626           | AUH                | 549           | 0.747127           | AGTPBP1            | 23287         | 0.840264           | BSPRY              |
| ANAPC11            | 51529         | 0.773325           | AUP1               | 550           | -0.735817          | AHRR               | 57491         | 0.782927           | BTBD8              |
| ANGPTL2            | 23452         | -0.793519          | B4GALT2            | 8704          | 0.714744           | AHSA1              | 10598         | 0.824309           | C10orf104          |
| ANGPTL3            | 27329         | 0.711084           | B9D1               | 27077         | 0.784069           | AIPL1              | 23746         | 0.745908           | C10orf12           |
| ANKRA2             | 57763         | -0.707427          | bA16L21.2.1        | 548645        | -0.716619          | AKAP7              | 9465          | 0.751277           | C14orf100          |
| ANKRD12            | 23253         | -0.761882          | BCL2L1             | 598           | 0.808813           | AKAP8L             | 26993         | 0.829686           | C14orf108          |
| ANKRD13C           | 81573         | -0.709759          | BCL6B              | 255877        | -0.70051           | AKAP9              | 10142         | 0.772588           | C14orf133          |

|             |        |           |           |        |           |          |        |           |           |
|-------------|--------|-----------|-----------|--------|-----------|----------|--------|-----------|-----------|
| ANKRD16     | 54522  | -0.809818 | BCMO1     | 53630  | 0.804278  | AKR1B1   | 231    | 0.77903   | C14orf45  |
| ANKRD25     | 25959  | -0.733549 | BDH2      | 56898  | 0.838998  | AKR1C1   | 1645   | -0.723165 | C15orf34  |
| ANKRD38     | 163782 | -0.722464 | BDP1      | 55814  | 0.73162   | AKR1CL2  | 83592  | -0.79434  | C16orf3   |
| ANKRD50     | 57182  | 0.718599  | BMP3      | 651    | 0.761167  | AKT1     | 207    | 0.805533  | C16orf79  |
| ANPEP       | 290    | -0.843362 | BNC2      | 54796  | -0.727905 | AKT3     | 10000  | 0.75319   | C19orf52  |
| ANXA13      | 312    | -0.752219 | BPNT1     | 10380  | -0.78277  | ALCAM    | 214    | 0.822817  | C1orf174  |
| AP1GBP1     | 11276  | 0.718685  | BRMS1     | 25855  | 0.785144  | ALDH1A2  | 8854   | 0.777188  | C1orf85   |
| AP1S1       | 1174   | 0.753179  | BSG       | 682    | 0.723654  | ALDH1B1  | 219    | 0.863024  | C20orf149 |
| AP4M1       | 9179   | 0.775177  | BTBD8     | 284697 | 0.707484  | ALDH3B2  | 222    | 0.763706  | C20orf166 |
| APIP        | 51074  | -0.749015 | BTN2A2    | 10385  | 0.72975   | ALDOB    | 229    | 0.808855  | C20orf199 |
| AQP1        | 358    | 0.720232  | C10orf104 | 119504 | 0.75345   | ALOX5AP  | 241    | 0.741286  | C20orf94  |
| AQR         | 9716   | 0.79874   | C10orf76  | 79591  | -0.742156 | AMELX    | 265    | -0.794093 | C2orf52   |
| ARF6        | 382    | -0.723966 | C12orf5   | 57103  | 0.75123   | AMPD1    | 270    | -0.717539 | C3orf19   |
| ARFRP1      | 10139  | -0.736341 | C14orf100 | 51528  | 0.756141  | AMTN     | 401138 | 0.773309  | C5orf20   |
| ARID4B      | 51742  | 0.757793  | C14orf105 | 55195  | 0.74798   | ANAPC11  | 51529  | 0.822381  | C5orf35   |
| ARPM1       | 84517  | -0.803742 | C14orf108 | 55745  | 0.708384  | ANAPC5   | 51433  | 0.70441   | C8A       |
| ARR3        | 407    | -0.701084 | C14orf133 | 63894  | 0.703355  | ANGEL1   | 23357  | 0.783796  | CAMK1D    |
| ARSH        | 347527 | 0.795869  | C14orf45  | 80127  | -0.783924 | ANGPTL2  | 23452  | -0.744412 | CAMK2A    |
| ASB18       | 401036 | -0.778606 | C15orf34  | 80072  | -0.762735 | ANKRD13D | 338692 | -0.7748   | CAMK2B    |
| ASB4        | 51666  | -0.707179 | C15orf43  | 145645 | 0.701708  | ANKRD18A | 253650 | -0.740051 | CAMK2N2   |
| ASB8        | 140461 | 0.776375  | C15orf44  | 81556  | 0.709037  | ANKRD22  | 118932 | -0.830382 | CASP10    |
| ASNS        | 440    | 0.7725    | C15orf52  | 388115 | 0.737672  | ANKRD25  | 25959  | -0.705326 | CBFA2T2   |
| ATF2        | 1386   | 0.764393  | C16orf79  | 283870 | 0.727423  | ANKRD38  | 163782 | -0.722425 | CD3E      |
| ATP13A2     | 23400  | 0.835989  | C19orf20  | 91978  | -0.776171 | ANKRD39  | 51239  | 0.7616    | CDH18     |
| ATP6AP1     | 537    | -0.730709 | C19orf22  | 91300  | -0.743533 | ANKRD50  | 57182  | 0.835423  | CDKL5     |
| ATP6V0C     | 527    | -0.785342 | C19orf25  | 148223 | 0.728727  | ANKRD54  | 129138 | -0.747752 | CDKN1A    |
| ATP8B2      | 57198  | -0.733422 | C19orf31  | 404664 | 0.714194  | ANKRD58  | 347454 | 0.738655  | CDX1      |
| ATP8B4      | 79895  | -0.76164  | C19orf52  | 90580  | 0.782665  | ANTXRL   | 195977 | 0.808556  | CEP350    |
| ATPBD1B     | 54707  | -0.723921 | C1orf170  | 84808  | -0.732363 | AP1GBP1  | 11276  | 0.850185  | CEP68     |
| ATXN7L3     | 56970  | -0.741193 | C1orf174  | 339448 | 0.814028  | AP4M1    | 9179   | 0.814841  | CETN2     |
| AUP1        | 550    | -0.843785 | C1orf182  | 128229 | -0.705367 | APOBEC3A | 200315 | -0.757821 | CFLAR     |
| AUTS2       | 26053  | -0.782084 | C1orf191  | 619518 | 0.702329  | APOL5    | 80831  | 0.812992  | CFP       |
| B3GALNT1    | 8706   | 0.705864  | C1orf58   | 148362 | 0.745207  | AQR      | 9716   | 0.850723  | CHORDC1   |
| B3GALT2     | 8707   | -0.821753 | C1orf85   | 112770 | -0.734916 | AR       | 367    | 0.707335  | CIITA     |
| bA16L21.2.1 | 548645 | -0.916066 | C20orf10  | 27296  | 0.833709  | ARF4     | 378    | 0.752644  | CIR       |
| BAZ2A       | 11176  | 0.750581  | C20orf108 | 116151 | 0.719421  | ARFGAP3  | 26286  | 0.702491  | CITED1    |
| BBS7        | 55212  | 0.762004  | C20orf149 | 79144  | 0.811246  | ARHGAP23 | 57636  | 0.756155  | CKS2      |
| BCL11B      | 64919  | -0.724713 | C20orf166 | 128826 | -0.773612 | ARHGEF16 | 27237  | 0.75123   | CLDN17    |
| BCL7B       | 9275   | 0.711849  | C21orf2   | 755    | 0.719838  | ARHGEF2  | 9181   | 0.779095  | CLIC3     |
| BCL7C       | 9274   | 0.755753  | C21orf55  | 54943  | 0.709815  | ARHGEF5  | 7984   | 0.784071  | COBRA1    |
| BCMO1       | 53630  | 0.72875   | C22orf26  | 55267  | 0.727491  | ARID3B   | 10620  | -0.722373 | COG4      |
| BDH2        | 56898  | 0.769469  | C2orf52   | 151477 | 0.770068  | ARID4B   | 51742  | 0.765826  | COL16A1   |
| BEST1       | 7439   | -0.79712  | C3orf19   | 51244  | -0.772274 | ARL13B   | 200894 | -0.704023 | COQ3      |
| BEX2        | 84707  | -0.700769 | C5orf26   | 114915 | 0.803793  | ARL2BP   | 23568  | 0.818198  | CPOX      |
| BIRC8       | 112401 | -0.781461 | C5orf35   | 133383 | -0.741809 | ARL6IP5  | 10550  | 0.726266  | CRADD     |



|            |        |           |          |        |           |             |        |           |            |
|------------|--------|-----------|----------|--------|-----------|-------------|--------|-----------|------------|
| BPIL2      | 254240 | 0.751231  | C9orf103 | 414328 | 0.73463   | ARMC4       | 55130  | 0.755754  | CRP        |
| BRIP1      | 83990  | -0.726926 | C9orf40  | 55071  | 0.743003  | ARNTL2      | 56938  | 0.771305  | CSNK1D     |
| BRSK1      | 84446  | 0.792922  | CA5A     | 763    | 0.796185  | ARPC4       | 10093  | 0.740706  | CTNND1     |
| BSCCL2     | 26580  | -0.722759 | CAMK1D   | 57118  | 0.718102  | ARR3        | 407    | -0.702583 | CXCL12     |
| BTBD10     | 84280  | 0.746131  | CAMK2A   | 815    | 0.81976   | ASB8        | 140461 | 0.822047  | CXorf30    |
| BTBD7      | 55727  | 0.725041  | CAMK2B   | 816    | 0.772568  | ASB9        | 140462 | 0.827715  | CXorf41    |
| BUB1       | 699    | 0.846987  | CAMK2N2  | 94032  | -0.749659 | ASMT        | 438    | 0.737355  | CYP17A1    |
| C10orf10   | 11067  | 0.704273  | CBFA2T2  | 9139   | -0.717764 | ASNS        | 440    | 0.836835  | CYP51A1    |
| C10orf104  | 119504 | 0.738128  | CBWD2    | 150472 | 0.751192  | ASPCR1      | 79058  | -0.700384 | CYTL1      |
| C10orf107  | 219621 | -0.83738  | CCDC110  | 256309 | 0.704451  | ATAD3B      | 83858  | 0.742412  | DDX24      |
| C10orf114  | 399726 | 0.704717  | CCDC37   | 348807 | 0.759011  | ATF1        | 466    | 0.794003  | DEK        |
| C10orf129  | 142827 | 0.788155  | CCT6A    | 908    | -0.711137 | ATF2        | 1386   | 0.786092  | DGKI       |
| C10orf40   | 283025 | 0.724987  | CD109    | 135228 | 0.778739  | ATG2A       | 23130  | 0.762481  | DHH        |
| C12orf41   | 54934  | -0.719224 | CD52     | 1043   | 0.715743  | ATOX1       | 475    | 0.867023  | DIO1       |
| C12orf64   | 283310 | -0.78118  | CD81     | 975    | 0.747818  | ATP2A1      | 487    | -0.729149 | DIP        |
| C12orf65   | 91574  | 0.724993  | CDAN1    | 146059 | 0.709995  | ATP5F1      | 515    | 0.774164  | DKFZp761B1 |
| C14orf106  | 55320  | -0.777489 | CDC42BPB | 9578   | 0.772101  | ATP5G1      | 516    | 0.709639  | DLG4       |
| C14orf108  | 55745  | 0.70174   | CDH18    | 1016   | 0.795134  | ATP5H       | 10476  | 0.754661  | DMC1       |
| C14orf133  | 63894  | 0.721407  | CDKL5    | 6792   | 0.73831   | ATP6V1F     | 9296   | 0.732021  | DMXL2      |
| C14orf166B | 145497 | -0.760846 | CDKN1A   | 1026   | 0.828987  | ATP8B4      | 79895  | -0.730608 | DSCR4      |
| C14orf28   | 122525 | 0.827925  | CEP350   | 9857   | -0.743109 | ATPBD1B     | 54707  | -0.756687 | DUOX2      |
| C14orf32   | 93487  | 0.736098  | CEP68    | 23177  | -0.753956 | ATXN7L2     | 127002 | -0.706863 | DUSP2      |
| C14orf83   | 161145 | 0.708674  | CES7     | 221223 | 0.744044  | AUP1        | 550    | -0.796656 | DUSP21     |
| C14orf94   | 54930  | 0.745442  | CETN2    | 1069   | -0.715852 | AVEN        | 57099  | 0.736287  | DYRK1A     |
| C15orf32   | 145858 | -0.771572 | CFLAR    | 8837   | 0.755787  | B3GALNT1    | 8706   | 0.806285  | ECHDC2     |
| C15orf34   | 80072  | -0.86482  | CHMP2A   | 27243  | -0.752939 | B4GALNT1    | 2583   | 0.767229  | EFNB1      |
| C15orf39   | 56905  | -0.710345 | CIITA    | 4261   | -0.701277 | B4GALT4     | 8702   | 0.732749  | EIF4EBP2   |
| C15orf43   | 145645 | 0.708539  | CITED1   | 4435   | -0.81237  | bA16L21.2.1 | 548645 | -0.820416 | EIF5       |
| C17orf83   | 374768 | -0.750048 | CLCNKB   | 1188   | 0.734897  | BAT1        | 7919   | 0.727268  | EPB41L4A   |
| C17orf87   | 388325 | 0.75273   | CLDN17   | 26285  | 0.722653  | BBS2        | 583    | 0.830295  | EPM2A      |
| C19orf43   | 79002  | -0.715955 | CLDN9    | 9080   | 0.70807   | BCDO2       | 83875  | 0.740781  | ERN1       |
| C19orf44   | 84167  | 0.77246   | CLEC16A  | 23274  | 0.79157   | BCKDK       | 10295  | 0.867775  | EXOC6B     |
| C19orf52   | 90580  | 0.832038  | CLOCK    | 9575   | 0.779651  | BCL2        | 596    | 0.736244  | EXOC8      |
| C19orf53   | 28974  | -0.733422 | CNKSR3   | 154043 | 0.715614  | BCL2L13     | 23786  | 0.838481  | EXOSC7     |
| C19orf61   | 56006  | -0.7374   | CNN3     | 1266   | 0.703064  | BCL7B       | 9275   | 0.814236  | EXT1       |
| C1orf102   | 127700 | 0.725846  | COBRA1   | 25920  | 0.73207   | BCL7C       | 9274   | 0.784981  | FAM14B     |
| C1orf111   | 284680 | 0.722695  | COL16A1  | 1307   | 0.7884    | BCLAF1      | 9774   | 0.793443  | FAM40B     |
| C1orf114   | 57821  | -0.81858  | COLEC11  | 78989  | -0.853801 | BCMO1       | 53630  | 0.802347  | FARS2      |
| C1orf129   | 80133  | 0.704605  | CPNE4    | 131034 | 0.712025  | BDH2        | 56898  | 0.713224  | FBN3       |
| C1orf156   | 92342  | -0.727779 | CRLF3    | 51379  | 0.71305   | BEST1       | 7439   | -0.810075 | FCHO1      |
| C1orf165   | 79656  | -0.720988 | CROT     | 54677  | 0.746501  | BEST2       | 54831  | 0.733199  | FDX1L      |
| C1orf182   | 128229 | -0.772474 | CRP      | 1401   | 0.781771  | BEX5        | 340542 | 0.865831  | FEV        |
| C1orf26    | 54823  | -0.853716 | CRYAA    | 1409   | 0.778014  | BFAR        | 51283  | 0.720122  | FGF20      |
| C1orf62    | 254268 | 0.798125  | CSNK1D   | 1453   | 0.772298  | BGLAP       | 632    | 0.747036  | FHL5       |
| C1orf66    | 51093  | 0.744717  | CSNK2A2  | 1459   | 0.700872  | BHMT        | 635    | 0.813232  | FKBP8      |

|           |        |           |            |        |           |           |        |           |          |
|-----------|--------|-----------|------------|--------|-----------|-----------|--------|-----------|----------|
| C1orf85   | 112770 | -0.714113 | CTDSPL     | 10217  | 0.757267  | BICD1     | 636    | 0.716344  | FLJ21075 |
| C1QTNF1   | 114897 | 0.769267  | CXCL12     | 6387   | 0.806137  | BIRC8     | 112401 | -0.702642 | FLJ21438 |
| C20orf106 | 200232 | -0.783883 | CXorf30    | 645090 | 0.73876   | BMP3      | 651    | 0.718014  | FOXN1    |
| C20orf149 | 79144  | 0.766708  | CXorf41    | 139212 | 0.723119  | BMPR1B    | 658    | 0.795275  | FRAP1    |
| C20orf166 | 128826 | -0.713174 | CYP1A2     | 1544   | 0.70941   | BNC1      | 646    | -0.747914 | FRMD6    |
| C20orf175 | 140876 | 0.783846  | CYTL1      | 54360  | -0.765209 | BNC2      | 54796  | -0.707739 | FRY      |
| C20orf191 | 149934 | 0.730285  | DCC1       | 79075  | 0.716685  | BOLA2B    | 654483 | 0.791701  | FYN      |
| C20orf199 | 441951 | 0.785267  | DCK        | 1633   | 0.705096  | BPGM      | 669    | 0.761504  | GAL      |
| C20orf71  | 128861 | 0.719559  | DDX24      | 57062  | 0.770086  | BPIL2     | 254240 | 0.720243  | GCH1     |
| C20orf82  | 140862 | 0.801238  | DGAT2      | 84649  | 0.740455  | BRAP      | 8315   | 0.723412  | GDF6     |
| C20orf86  | 140731 | -0.744541 | DGKI       | 9162   | 0.762564  | BRCA2     | 675    | 0.709838  | GLE1     |
| C20orf94  | 128710 | 0.782362  | DIP        | 23151  | 0.78392   | BRIP1     | 83990  | -0.724182 | GLYCTK   |
| C21orf13  | 150082 | -0.721645 | DIRC2      | 84925  | -0.707635 | BRSK1     | 84446  | 0.745752  | GNPTG    |
| C2orf50   | 130813 | -0.841943 | DKFZp761B1 | 91050  | -0.709344 | BSG       | 682    | 0.791775  | GORASP2  |
| C3orf10   | 55845  | -0.764257 | DLG4       | 1742   | 0.820229  | BTBD10    | 84280  | 0.799653  | GPD2     |
| C3orf19   | 51244  | -0.732546 | DMXL2      | 23312  | 0.748155  | BTBD7     | 55727  | 0.710688  | GPR107   |
| C3orf44   | 131831 | -0.718459 | DNAJA4     | 55466  | 0.727135  | BTF3L4    | 91408  | 0.743082  | GPR152   |
| C3orf54   | 389119 | 0.851067  | DNAJC3     | 5611   | -0.704729 | BTN2A2    | 10385  | 0.843853  | GPR161   |
| C4orf22   | 255119 | -0.718398 | DSCR4      | 10281  | -0.709717 | BTN2A3    | 54718  | 0.744376  | GPR174   |
| C5orf35   | 133383 | -0.705096 | DSG1       | 1828   | 0.727227  | BTN3A1    | 11119  | 0.826379  | GPR175   |
| C5orf4    | 10826  | -0.803938 | DUOX2      | 50506  | 0.856239  | BTN3A3    | 10384  | 0.924725  | GPR39    |
| C6orf120  | 387263 | 0.719889  | DUSP10     | 11221  | 0.809908  | BTRC      | 8945   | -0.756906 | GPX7     |
| C6orf145  | 221749 | 0.770255  | EBNA1BP2   | 10969  | 0.764668  | BUB1      | 699    | 0.746886  | GRM3     |
| C6orf205  | 394263 | 0.749098  | EHMT2      | 10919  | 0.717167  | BXDC2     | 55299  | 0.757534  | GSPT1    |
| C6orf70   | 55780  | 0.78075   | EIF2C1     | 26523  | 0.707811  | BYSL      | 705    | 0.718848  | HBXIP    |
| C7orf36   | 57002  | 0.783566  | EIF4EBP2   | 1979   | -0.704293 | BZW1      | 9689   | 0.704572  | HCCS     |
| C8A       | 731    | 0.815051  | ENTPD2     | 954    | 0.711366  | C10orf10  | 11067  | 0.792004  | HDHD1A   |
| C8ORFK36  | 340359 | -0.837394 | ENTPD5     | 957    | 0.734913  | C10orf104 | 119504 | 0.751473  | HOXA10   |
| C9orf23   | 138716 | 0.794938  | ENY2       | 56943  | 0.727011  | C10orf107 | 219621 | -0.742539 | HOXA9    |
| C9orf32   | 28989  | -0.744454 | EPHB1      | 2047   | 0.78176   | C10orf114 | 399726 | 0.777332  | HOXC4    |
| C9orf7    | 11094  | -0.869014 | EPX        | 8288   | 0.763281  | C10orf12  | 26148  | 0.754783  | HSD11B1  |
| C9orf89   | 84270  | -0.784251 | ERBB4      | 2066   | -0.805273 | C10orf40  | 283025 | 0.876104  | HYAL4    |
| C9orf93   | 203238 | -0.79086  | ERH        | 2079   | 0.811703  | C10orf55  | 414236 | 0.774785  | IDS      |
| C9orf96   | 169436 | -0.736765 | ETF1       | 2107   | 0.72215   | C10orf58  | 84293  | 0.752307  | IFNA4    |
| C9orf98   | 158067 | -0.762772 | EXOC8      | 149371 | 0.732949  | C10orf62  | 414157 | 0.773342  | IKZF2    |
| CA3       | 761    | 0.741814  | EXOSC7     | 23016  | 0.799684  | C10orf78  | 119392 | 0.756516  | IL2      |
| CAB39     | 51719  | -0.861897 | FAM14B     | 122509 | -0.733233 | C10orf83  | 118812 | 0.711477  | IL27     |
| CABLES1   | 91768  | -0.729866 | FAM19A5    | 25817  | 0.7548    | C10orf92  | 54777  | -0.807548 | INSM2    |
| CABLES2   | 81928  | 0.715021  | FAM30A     | 29064  | 0.720716  | C11orf38  | 399967 | 0.760309  | IRF9     |
| CACNG6    | 59285  | 0.755193  | FAM55A     | 120400 | 0.783046  | C11orf41  | 25758  | 0.702784  | IRS4     |
| CADM1     | 23705  | -0.846127 | FAM58B     | 339521 | 0.716208  | C11orf54  | 28970  | 0.700248  | IRX4     |
| CADPS     | 8618   | 0.757843  | FAM8A1     | 51439  | 0.70736   | C11orf71  | 54494  | 0.71465   | ITM2C    |
| CALML5    | 51806  | 0.711904  | FARS2      | 10667  | 0.789215  | C11orf73  | 51501  | 0.764101  | KEL      |
| CAMK2N2   | 94032  | -0.819558 | FBN3       | 84467  | -0.81503  | C12orf31  | 84298  | 0.827716  | KIAA0157 |
| CASKIN1   | 57524  | -0.714024 | FBXL10     | 84678  | 0.705965  | C12orf48  | 55010  | 0.813664  | KIAA0232 |

|          |        |           |          |           |           |            |        |           |            |
|----------|--------|-----------|----------|-----------|-----------|------------|--------|-----------|------------|
| CASP10   | 843    | -0.841875 | FCHSD2   | 9873      | -0.719348 | C12orf64   | 283310 | -0.722363 | KIAA0888   |
| CBFA2T2  | 9139   | -0.864385 | FER1L5   | 90342     | 0.751771  | C13orf26   | 122046 | -0.780914 | KIAA0895   |
| CCDC49   | 54883  | -0.70012  | FGL2     | 10875     | 0.767815  | C13orf31   | 144811 | -0.714182 | KIAA1033   |
| CCDC54   | 84692  | -0.701646 | FKBP8    | 23770     | 0.784042  | C13orf33   | 84935  | 0.783093  | KIAA1543   |
| CCDC77   | 84318  | -0.736683 | FLJ21438 | 64926     | -0.709325 | C14orf118  | 55668  | -0.780759 | KLK15      |
| CCDC81   | 60494  | -0.754    | FLJ39660 | 284992    | 0.78132   | C14orf130  | 55148  | 0.818323  | KLRG1      |
| CCK      | 885    | -0.706287 | FLJ46321 | 389763    | -0.720411 | C14orf132  | 56967  | 0.726239  | LARP7      |
| CCKAR    | 886    | -0.725102 | FNBP1    | 23048     | 0.700018  | C14orf133  | 63894  | 0.900639  | LATS1      |
| CCL17    | 6361   | 0.705104  | FOXC1    | 2296      | 0.709525  | C14orf166B | 145497 | -0.776985 | LETMD1     |
| CCND3    | 896    | 0.758892  | FOXN1    | 8456      | 0.800524  | C14orf28   | 122525 | 0.776916  | LGICZ1     |
| CCNT2    | 905    | -0.764003 | FRMPD4   | 9758      | 0.758666  | C14orf32   | 93487  | 0.829838  | LNX1       |
| CCS      | 9973   | 0.816842  | FSTSJ2   | 29960     | -0.734022 | C15orf23   | 90417  | 0.727254  | LOC100129C |
| CCT6A    | 908    | -0.722392 | FUT5     | 2527      | 0.703888  | C15orf29   | 79768  | 0.755283  | LOC1001302 |
| CCT8     | 10694  | 0.737229  | FYN      | 2534      | 0.735092  | C15orf32   | 145858 | -0.746801 | LOC1001307 |
| CCT8L1   | 155100 | 0.713655  | GABRG1   | 2565      | 0.733728  | C15orf43   | 145645 | 0.755819  | LOC1001318 |
| CD2      | 914    | 0.732953  | GABRG2   | 2566      | 0.732734  | C15orf48   | 84419  | 0.757471  | LOC1001322 |
| CD300LG  | 146894 | 0.731556  | GAL      | 51083     | 0.702824  | C16orf3    | 750    | 0.75399   | LOC1001327 |
| CD53     | 963    | -0.831159 | GAL3ST1  | 9514      | 0.726862  | C17orf42   | 79736  | 0.811754  | LOC1001337 |
| CD81     | 975    | 0.706175  | GALNT17  | 442117    | 0.726876  | C17orf87   | 388325 | 0.82273   | LOC1001337 |
| CDC14C   | 168448 | 0.7526    | GCH1     | 2643      | 0.76558   | C17orf89   | 284184 | 0.748216  | LOC1001342 |
| CDC42EP4 | 23580  | 0.730456  | GDF6     | 392255    | 0.750272  | C18orf18   | 147525 | 0.81505   | LOC120318  |
| CDH4     | 1002   | -0.813288 | GGT6     | 124975    | -0.734564 | C18orf22   | 79863  | 0.792972  | LOC139431  |
| CEBPZ    | 10153  | 0.724898  | GHRHR    | 2692      | 0.782876  | C19orf22   | 91300  | -0.770657 | LOC139542  |
| CENTG1   | 116986 | -0.716414 | GLE1     | 2733      | 0.822203  | C19orf44   | 84167  | 0.811278  | LOC144983  |
| CEP350   | 9857   | -0.778393 | GLYCK    | 132158    | -0.773333 | C19orf48   | 84798  | 0.854763  | LOC150051  |
| CGNL1    | 84952  | -0.776949 | GNAL     | 2774      | 0.72106   | C19orf52   | 90580  | 0.767316  | LOC150763  |
| CHAC2    | 494143 | -0.709158 | GNAS     | 2778      | 0.760832  | C19orf53   | 28974  | -0.810435 | LOC152485  |
| CHCHD4   | 131474 | 0.730371  | GORASP2  | 26003     | 0.7398    | C19orf61   | 56006  | -0.785398 | LOC159184  |
| CHD2     | 1106   | 0.79534   | GPR107   | 57720     | 0.84515   | C1orf102   | 127700 | 0.724503  | LOC162993  |
| CHD7     | 55636  | -0.725562 | GPR119   | 139760    | 0.741174  | C1orf108   | 79647  | 0.715006  | LOC285501  |
| CHM      | 1121   | -0.797876 | GPR174   | 84636     | 0.864349  | C1orf110   | 339512 | 0.733022  | LOC388532  |
| CHML     | 1122   | -0.809719 | GPR64    | 10149     | 0.8251    | C1orf111   | 284680 | 0.747304  | LOC389101  |
| CHMP1A   | 5119   | -0.718162 | GPX7     | 2882      | 0.715623  | C1orf114   | 57821  | -0.775784 | LOC391648  |
| CHN1     | 1123   | 0.729579  | GRIK5    | 2901      | 0.72783   | C1orf128   | 57095  | 0.841888  | LOC391742  |
| CHP      | 11261  | 0.74017   | GRM3     | 2913      | -0.713002 | C1orf129   | 80133  | 0.803446  | LOC392193  |
| CHRNA4   | 1137   | 0.703948  | GSPT1    | 2935      | 0.730267  | C1orf167   | 284498 | 0.792932  | LOC401911  |
| CIITA    | 4261   | -0.735808 | HAND2    | 9464      | 0.741049  | C1orf182   | 128229 | -0.718258 | LOC441506  |
| CIR      | 9541   | -0.753957 | HBCBP    | 100130083 | 0.703291  | C1orf210   | 149466 | -0.7713   | LOC641977  |
| CITED1   | 4435   | -0.831899 | HBXIP    | 10542     | 0.792734  | C1orf35    | 79169  | 0.700617  | LOC644010  |
| CKS2     | 1164   | 0.744961  | HCCS     | 3052      | 0.818479  | C1orf49    | 84066  | 0.701251  | LOC646300  |
| CLDN17   | 26285  | 0.747016  | HDDC3    | 374659    | 0.722642  | C1orf62    | 254268 | 0.715248  | LOC646696  |
| CLDN9    | 9080   | 0.701351  | HDHD1A   | 8226      | 0.765013  | C1orf85    | 112770 | -0.821978 | LOC646810  |
| CLEC12B  | 387837 | 0.728649  | HES5     | 388585    | 0.711053  | C1orf9     | 51430  | -0.771281 | LOC651042  |
| CLEC4A   | 50856  | 0.746805  | HISPPD1  | 23262     | 0.782682  | C1QTNF1    | 114897 | 0.713571  | LOC653125  |
| CLIC3    | 9022   | 0.799461  | HLA-DMB  | 3109      | 0.76768   | C20orf106  | 200232 | -0.705877 | LOC728344  |

|         |        |           |          |        |           |           |        |           |           |
|---------|--------|-----------|----------|--------|-----------|-----------|--------|-----------|-----------|
| CLRN2   | 645104 | -0.861773 | HNT      | 50863  | 0.716436  | C20orf121 | 79183  | 0.738254  | LOC729960 |
| CLTCL1  | 8218   | 0.701881  | HOXA10   | 3206   | 0.723108  | C20orf149 | 79144  | 0.704499  | LOC730144 |
| CNOT10  | 25904  | -0.756622 | HOXA7    | 3204   | 0.77215   | C20orf166 | 128826 | -0.836097 | LONP1     |
| CNOT4   | 4850   | -0.777681 | HOXA9    | 3205   | 0.839719  | C20orf175 | 140876 | 0.757859  | LRP1B     |
| COBRA1  | 25920  | 0.848515  | HOXC4    | 3221   | 0.75855   | C20orf185 | 359710 | 0.807907  | LRP2      |
| COG4    | 25839  | -0.740603 | HSD11B1  | 3290   | -0.717965 | C20orf186 | 149954 | 0.848985  | LRRC20    |
| COL10A1 | 1300   | 0.766011  | HSD17B13 | 345275 | 0.746505  | C20orf191 | 149934 | 0.755235  | LRRC31    |
| COPB1   | 1315   | -0.782364 | HSF5     | 124535 | -0.729861 | C20orf199 | 441951 | 0.779837  | LRRN1     |
| COPS2   | 9318   | 0.736764  | HSPB6    | 126393 | -0.73596  | C20orf23  | 55614  | -0.796187 | LY6D      |
| COQ3    | 51805  | 0.796403  | HYAL4    | 23553  | 0.803278  | C20orf46  | 55321  | 0.711664  | MALL      |
| CORO1B  | 57175  | 0.71552   | ICOSLG   | 23308  | 0.788067  | C20orf71  | 128861 | 0.831661  | MAP2K5    |
| CORO6   | 84940  | -0.798148 | IDS      | 3423   | 0.835453  | C20orf82  | 140862 | 0.820361  | MAP4K1    |
| CORT    | 1325   | 0.722272  | IFNA16   | 3449   | 0.791324  | C20orf94  | 128710 | 0.903696  | MAST3     |
| COX15   | 1355   | -0.743228 | IFNA4    | 3441   | -0.727755 | C21orf29  | 54084  | 0.834224  | MBD2      |
| COX6A2  | 1339   | -0.738174 | IL13RA1  | 3597   | 0.710468  | C21orf7   | 56911  | 0.720971  | MC4R      |
| CPOX    | 1371   | 0.756272  | IL1RAP   | 3556   | 0.716871  | C2orf27   | 29798  | 0.716893  | MED23     |
| CPSF6   | 11052  | 0.714151  | IL2      | 3558   | 0.796362  | C2orf32   | 25927  | 0.737866  | MFSD4     |
| CRADD   | 8738   | -0.708219 | INE1     | 8552   | 0.711993  | C2orf34   | 79823  | 0.794629  | MGC35361  |
| CRELD2  | 79174  | -0.702163 | INSM2    | 84684  | 0.840127  | C2orf50   | 130813 | -0.794544 | MKLN1     |
| CRISP2  | 7180   | -0.793133 | IQCJ     | 654502 | 0.731222  | C2orf53   | 339779 | 0.716774  | MMS19     |
| CRISP3  | 10321  | 0.728144  | IRF9     | 10379  | 0.824996  | C2orf58   | 285154 | 0.756816  | MPHOSPH1C |
| CRP     | 1401   | 0.714987  | ITGAL    | 3683   | 0.725112  | C3orf28   | 26355  | 0.771481  | MS4A5     |
| CRTAP   | 10491  | -0.776576 | ITGBL1   | 9358   | 0.726582  | C3orf34   | 84984  | 0.727831  | MTMR11    |
| CRYBA4  | 1413   | -0.78798  | KAL1     | 3730   | 0.735597  | C3orf49   | 132200 | 0.78114   | MUM1L1    |
| CRYL1   | 51084  | 0.765839  | KCNC1    | 3746   | 0.738785  | C3orf57   | 165679 | 0.732612  | MYO3A     |
| CSNK2A1 | 1457   | -0.775544 | KCND1    | 3750   | -0.706042 | C3orf59   | 151963 | 0.702338  | NANS      |
| CSNK2A2 | 1459   | 0.792572  | KCNN2    | 3781   | 0.772928  | C4orf17   | 84103  | 0.711118  | NDUFA4L2  |
| CTCF    | 140690 | 0.742599  | KCNT1    | 57582  | 0.743661  | C5orf21   | 83989  | 0.806423  | NDUFB4    |
| CTDSP2  | 10106  | 0.766356  | KEL      | 3792   | 0.78784   | C6orf141  | 135398 | -0.8157   | NF1       |
| CTLA4   | 1493   | -0.765355 | KIAA0859 | 51603  | 0.733751  | C6orf146  | 222826 | 0.770886  | NLN       |
| CTRC    | 11330  | 0.803848  | KIAA0888 | 26049  | 0.740539  | C6orf174  | 387104 | 0.718946  | NLRP4     |
| CTSS    | 1520   | 0.776223  | KIAA1033 | 23325  | 0.826076  | C6orf204  | 387119 | 0.73043   | NOC4L     |
| CXCL14  | 9547   | -0.735922 | KIF2A    | 3796   | 0.701391  | C6orf205  | 394263 | 0.862806  | NOVA2     |
| CXorf20 | 139105 | -0.701114 | KLF9     | 687    | 0.820079  | C6orf21   | 259215 | -0.726012 | NPHS1     |
| CYB5A   | 1528   | 0.702127  | KLHL33   | 123103 | -0.792293 | C6orf218  | 221718 | -0.804106 | NPM2      |
| CYBB    | 1536   | -0.890704 | KLHL9    | 55958  | 0.719817  | C6orf58   | 352999 | 0.706559  | NPTXR     |
| CYP17A1 | 1586   | 0.793161  | KRT19    | 3880   | 0.774309  | C6orf70   | 55780  | 0.701064  | NR1D2     |
| CYP1A2  | 1544   | 0.705539  | LARP7    | 51574  | -0.714582 | C6orf97   | 80129  | 0.833939  | NRD1      |
| CYP3A4  | 1576   | 0.730165  | LASP1    | 3927   | 0.702808  | C7orf23   | 79161  | 0.833766  | NRSN1     |
| CYP7B1  | 9420   | 0.788259  | LATS1    | 9113   | 0.726254  | C7orf36   | 57002  | 0.788608  | NUP160    |
| CYSLTR2 | 57105  | -0.80767  | LCE3B    | 353143 | 0.773317  | C8orf38   | 137682 | 0.843822  | NXP3      |
| DARS    | 1615   | 0.711988  | LDB2     | 9079   | 0.776341  | C8orf42   | 157695 | 0.725153  | OLAH      |
| DBT     | 1629   | -0.81868  | DLRAD3   | 143458 | 0.742089  | C8orf6    | 203081 | -0.812588 | OLIG2     |
| DCD     | 117159 | 0.745615  | LETMD1   | 25875  | 0.751147  | C9orf127  | 51754  | 0.719449  | OPN1LW    |
| DDX24   | 57062  | 0.717753  | LGALS8   | 3964   | -0.743356 | C9orf135  | 138255 | 0.834438  | OR2C1     |

|               |        |           |            |           |           |          |        |           |         |
|---------------|--------|-----------|------------|-----------|-----------|----------|--------|-----------|---------|
| DDX27         | 55661  | 0.701714  | LGICZ1     | 353174    | 0.765041  | C9orf140 | 89958  | 0.842667  | OR2M1P  |
| DDX58         | 23586  | 0.711062  | LIMK2      | 3985      | 0.723281  | C9orf23  | 138716 | 0.718251  | OR4C11  |
| DEDD          | 9191   | 0.758139  | LIN7C      | 55327     | 0.707693  | C9orf32  | 28989  | -0.786647 | OR52R1  |
| DEFB119       | 245932 | 0.747704  | LIPC       | 3990      | -0.769854 | C9orf52  | 158219 | -0.74713  | OSBP    |
| DEK           | 7913   | 0.773869  | LMBR1L     | 55716     | 0.73356   | C9orf58  | 83543  | 0.727914  | OSBPL1A |
| DENND2C       | 163259 | -0.853117 | LOC1001279 | 100127975 | 0.72625   | C9orf68  | 55064  | -0.709669 | OTUD1   |
| DGKD          | 8527   | 0.743744  | LOC1001287 | 100128717 | 0.800322  | C9orf89  | 84270  | -0.712455 | P2RX3   |
| DHFR          | 1719   | 0.76744   | LOC1001288 | 100128823 | 0.781559  | C9orf95  | 54981  | 0.760692  | P2RY4   |
| DIP           | 23151  | 0.733171  | LOC1001307 | 100130794 | 0.751332  | CA1      | 759    | 0.767828  | PACS2   |
| DKFZp586I1420 | 222161 | -0.781236 | LOC1001318 | 100131814 | 0.77199   | CA3      | 761    | 0.76138   | PARD6B  |
| DKFZp761B107  | 91050  | -0.765034 | LOC1001320 | 100132005 | -0.739552 | CA5A     | 763    | 0.759627  | PATZ1   |
| DKFZp779L1068 | 286144 | -0.715361 | LOC1001322 | 100132234 | 0.777687  | CA6      | 765    | 0.784543  | PAX7    |
| DKK3          | 27122  | 0.715598  | LOC1001327 | 100132728 | 0.75387   | CAB39    | 51719  | -0.811324 | PBLD    |
| DLAT          | 1737   | 0.714903  | LOC1001335 | 100133500 | -0.715114 | CACNA1F  | 778    | 0.784149  | PCDHA11 |
| DMC1          | 11144  | 0.700978  | LOC1001337 | 100133748 | 0.821318  | CACNG6   | 59285  | 0.834834  | PDE3B   |
| DMXL2         | 23312  | 0.759427  | LOC1001337 | 100133752 | 0.712661  | CADM1    | 23705  | -0.719413 | PDP2    |
| DNAJB13       | 374407 | 0.760558  | LOC126235  | 126235    | 0.717945  | CADPS    | 8618   | 0.894606  | PEX14   |
| DNAJC3        | 5611   | -0.833738 | LOC130865  | 130865    | 0.730047  | CALM1    | 801    | 0.843619  | PIK3CA  |
| DOCK9         | 23348  | 0.766975  | LOC139431  | 139431    | 0.792519  | CAMK1    | 8536   | 0.755696  | PITPNM3 |
| DOPEY1        | 23033  | 0.720801  | LOC139542  | 139542    | 0.846758  | CAMK2N2  | 94032  | -0.844468 | PLAC1L  |
| DOPEY2        | 9980   | -0.798315 | LOC144742  | 144742    | 0.700171  | CAMKV    | 79012  | 0.771323  | PLEKHF1 |
| DPM2          | 8818   | 0.767021  | LOC146325  | 146325    | 0.722367  | CAND2    | 23066  | 0.702758  | PLXDC2  |
| DPP10         | 57628  | -0.752528 | LOC151534  | 151534    | -0.701953 | CAPRIN2  | 65981  | -0.830579 | PMS1    |
| DSCR4         | 10281  | -0.823672 | LOC152485  | 152485    | 0.706068  | CAPS     | 828    | 0.793082  | POLR3A  |
| DSCR8         | 84677  | -0.742239 | LOC256085  | 256085    | 0.70454   | CARD6    | 84674  | 0.728545  | POU3F3  |
| DTD1          | 92675  | -0.707038 | LOC283951  | 283951    | 0.791908  | CASP7    | 840    | 0.77161   | POU5F2  |
| DUSP15        | 128853 | 0.73523   | LOC285501  | 285501    | 0.707441  | CAV1     | 857    | 0.792818  | PPFIA4  |
| DUSP19        | 142679 | -0.830509 | LOC342994  | 342994    | 0.738015  | CAV2     | 858    | 0.790812  | PPP1R3F |
| DUSP2         | 1844   | 0.809579  | LOC374920  | 374920    | 0.752206  | CBL      | 867    | -0.772832 | PPP2R5D |
| DUSP5         | 1847   | 0.809864  | LOC387820  | 387820    | 0.759596  | CBLN1    | 869    | -0.762531 | PPWD1   |
| DYNLT1        | 6993   | -0.781201 | LOC388524  | 388524    | 0.706829  | CBLN2    | 147381 | 0.731752  | PRAMEF4 |
| EAPP          | 55837  | -0.822691 | LOC388532  | 388532    | 0.831346  | CBX8     | 57332  | 0.715545  | PRMT6   |
| EEFSEC        | 60678  | -0.749641 | LOC389101  | 389101    | -0.787587 | CCDC110  | 256309 | 0.868028  | PROC    |
| EFEMP2        | 30008  | -0.758886 | LOC391271  | 391271    | 0.711624  | CCDC111  | 201973 | -0.731075 | PROK1   |
| EGF           | 1950   | 0.76686   | LOC391648  | 391648    | 0.859945  | CCDC137  | 339230 | -0.753927 | PSG7    |
| EHBP1L1       | 254102 | -0.711236 | LOC391701  | 391701    | 0.721577  | CCDC144A | 9720   | 0.746682  | PSKH2   |
| EI24          | 9538   | -0.701213 | LOC392193  | 392193    | 0.820699  | CCDC72   | 51372  | 0.768965  | PTAFR   |
| EIF2AK1       | 27102  | 0.770072  | LOC392473  | 392473    | 0.735836  | CCDC92   | 80212  | -0.726381 | PTPRE   |
| EIF4EBP2      | 1979   | -0.857985 | LOC401497  | 401497    | 0.749878  | CCL26    | 10344  | 0.807432  | PUM2    |
| EIF5          | 1983   | 0.782933  | LOC401911  | 401911    | 0.71408   | CCL27    | 10850  | 0.790724  | RAB27B  |
| EIF6          | 3692   | 0.739242  | LOC402193  | 402193    | 0.709314  | CCND3    | 896    | 0.700995  | RAI16   |
| ELA3B         | 23436  | 0.762991  | LOC441455  | 441455    | 0.771936  | CCNF     | 899    | 0.712914  | RAX2    |
| ELAVL2        | 1993   | -0.810418 | LOC441641  | 441641    | 0.793929  | CCNH     | 902    | 0.72196   | RB1     |
| ELK3          | 2004   | -0.74313  | LOC441898  | 441898    | 0.809231  | CCNJL    | 79616  | 0.741996  | RFX2    |
| ELP4          | 26610  | 0.755655  | LOC641977  | 641977    | -0.81466  | CCNO     | 10309  | 0.713345  | RFXANK  |

|           |        |           |           |        |           |          |        |           |            |
|-----------|--------|-----------|-----------|--------|-----------|----------|--------|-----------|------------|
| EML2      | 24139  | 0.721199  | LOC643459 | 643459 | 0.700649  | CCNYL1   | 151195 | 0.736617  | RGNEF      |
| EPB41L4A  | 64097  | 0.711377  | LOC644063 | 644063 | -0.737104 | CCRN4L   | 25819  | 0.727352  | RG57BP     |
| EPHA7     | 2045   | 0.723607  | LOC645573 | 645573 | 0.736111  | CCS      | 9973   | 0.739653  | RHCE       |
| EPHB6     | 2051   | 0.816741  | LOC646810 | 646810 | 0.777226  | CCT4     | 10575  | 0.719608  | RIMS1      |
| EPX       | 8288   | 0.732722  | LOC646960 | 646960 | 0.782188  | CCT6A    | 908    | -0.712261 | RIN1       |
| ERN1      | 2081   | 0.781441  | LOC649238 | 649238 | 0.724058  | CD2      | 914    | 0.853169  | RIOK1      |
| ERN2      | 10595  | 0.711613  | LOC728019 | 728019 | 0.822207  | CD300LG  | 146894 | 0.725396  | RNF43      |
| ESAM      | 90952  | 0.744254  | LOC728111 | 728111 | -0.741728 | CD320    | 51293  | 0.740931  | RPGRIP1L   |
| ESCO2     | 157570 | -0.855929 | LOC728577 | 728577 | -0.740602 | CD38     | 952    | 0.748611  | RPL31      |
| ETV2      | 2116   | -0.822876 | LOC729080 | 729080 | -0.725437 | CD3E     | 916    | 0.82382   | RTDR1      |
| EVC       | 2121   | 0.708786  | LOC729674 | 729674 | 0.797607  | CD63     | 967    | 0.788272  | RTTN       |
| EVX1      | 2128   | 0.749229  | LOC729764 | 729764 | 0.702477  | CD7      | 924    | 0.78383   | SAMD4B     |
| EXOC3L    | 283849 | -0.798404 | LOC729960 | 729960 | 0.806962  | CD81     | 975    | 0.775756  | SDAD1      |
| EXOSC7    | 23016  | 0.720706  | LOC729970 | 729970 | 0.749568  | CD86     | 942    | 0.776235  | SEC61A1    |
| FAAH      | 2166   | 0.810634  | LOC730144 | 730144 | -0.769803 | CDC14C   | 168448 | 0.72664   | SEMA3A     |
| FAM10A4   | 145165 | 0.706059  | LOC730834 | 730834 | 0.700497  | CDC25C   | 995    | 0.839323  | SEMA4F     |
| FAM116A   | 201627 | -0.725468 | LOC730920 | 730920 | 0.720745  | CDC7     | 8317   | 0.719043  | SERHL      |
| FAM120AOS | 158293 | -0.703544 | LRAT      | 9227   | 0.771181  | CDCA5    | 113130 | 0.812866  | SETDB1     |
| FAM120B   | 84498  | 0.794745  | LRP1B     | 53353  | 0.857458  | CDH4     | 1002   | -0.813336 | SGMS2      |
| FAM122B   | 159090 | 0.757109  | LTBP2     | 4053   | 0.761841  | CDH7     | 1005   | -0.71285  | SHC4       |
| FAM122C   | 159091 | -0.814232 | LUZP4     | 51213  | 0.715125  | CDH8     | 1006   | 0.703982  | SHMT1      |
| FAM127A   | 8933   | -0.752663 | LY6D      | 8581   | 0.755361  | CDKL3    | 51265  | 0.777544  | SHQ1       |
| FAM134C   | 162427 | -0.782218 | MAL2      | 114569 | -0.71043  | CDY2B    | 203611 | 0.777009  | SKIL       |
| FAM47C    | 442444 | -0.760347 | MALL      | 7851   | 0.702516  | CEACAM19 | 56971  | 0.704659  | SLC16A8    |
| FAM59B    | 150946 | 0.785906  | MALT1     | 10892  | 0.768159  | CEBPZ    | 10153  | 0.823245  | SLC19A2    |
| FAM5C     | 339479 | -0.736486 | MANBAL    | 63905  | -0.725835 | CENPN    | 55839  | 0.725     | SLC22A5    |
| FAM98C    | 147965 | -0.726912 | MAP2K5    | 5607   | 0.837711  | CENTA2   | 55803  | 0.747742  | SLC25A6    |
| FBN2      | 2201   | -0.74439  | MAP3K7    | 6885   | 0.770385  | CENTB2   | 23527  | 0.769194  | SLC26A1    |
| FBN3      | 84467  | -0.791065 | MAP4K1    | 11184  | 0.704931  | CEP250   | 11190  | 0.781067  | SLC4A1AP   |
| FBP2      | 8789   | -0.710219 | MASTL     | 84930  | 0.815552  | CEP350   | 9857   | -0.756097 | SLCOSA1    |
| FBXL13    | 222235 | 0.77861   | MATR3     | 9782   | -0.71849  | CERKL    | 375298 | 0.787068  | SMTNL1     |
| FBXL19    | 54620  | 0.754895  | MBD2      | 8932   | 0.742686  | CES7     | 221223 | 0.881582  | SNX1       |
| FBXO40    | 51725  | 0.770889  | MBTD1     | 54799  | 0.721531  | CFP      | 5199   | 0.816791  | SNX22      |
| FCHSD2    | 9873   | -0.779549 | MC4R      | 4160   | 0.762517  | CGRRF1   | 10668  | 0.770732  | SNX7       |
| FDX1L     | 112812 | -0.861357 | MED23     | 9439   | 0.756977  | CH25H    | 9023   | 0.719335  | SP100      |
| FER1L5    | 90342  | 0.75231   | MFSD1     | 64747  | 0.700254  | CHAC2    | 494143 | -0.752981 | SPACA4     |
| FEV       | 54738  | 0.726696  | MFSD4     | 148808 | 0.791857  | CHCHD4   | 131474 | 0.701205  | SPECC1L    |
| FEZF1     | 389549 | -0.715207 | MFSD5     | 84975  | 0.790817  | CHI3L1   | 1116   | 0.707587  | SPINT2     |
| FFAR2     | 2867   | -0.83734  | MKLN1     | 4289   | -0.702203 | CHM      | 1121   | -0.766535 | SPRR2E     |
| FGB       | 2244   | 0.721636  | MMS19     | 64210  | 0.743226  | CHN1     | 1123   | 0.765597  | ST13       |
| FGD6      | 55785  | 0.742867  | MOC53     | 27304  | 0.784983  | CHN2     | 1124   | 0.758179  | ST6GAL2    |
| FGF20     | 26281  | 0.755719  | MOSPD1    | 56180  | 0.718173  | CHP      | 11261  | 0.710349  | ST6GALNAC; |
| FGF7      | 2252   | -0.746074 | MPHOSPH1  | 9585   | 0.732638  | CHRNA3   | 1136   | 0.768812  | STXBPSL    |
| FHL2      | 2274   | -0.726382 | MPHOSPH1C | 10199  | 0.743503  | CHRNA5   | 1138   | 0.702751  | SUV39H2    |
| FHL5      | 9457   | 0.739715  | MPI       | 4351   | -0.770468 | CHST10   | 9486   | 0.720442  | THOP1      |

|          |        |           |          |        |           |         |        |           |         |
|----------|--------|-----------|----------|--------|-----------|---------|--------|-----------|---------|
| FKBP11   | 51303  | -0.806252 | MPST     | 4357   | -0.732773 | CHSY1   | 22856  | 0.806163  | TIMM9   |
| FKBP5    | 2289   | -0.707894 | MRPL34   | 64981  | -0.706022 | CIDEB   | 27141  | 0.722818  | TMC3    |
| FKSG2    | 59347  | 0.764184  | MRPL37   | 51253  | -0.718597 | CIR     | 9541   | -0.763668 | TMEM135 |
| FLCN     | 201163 | 0.726825  | MSR1     | 4481   | 0.74451   | CISD3   | 284106 | 0.736343  | TMEM39A |
| FLI1     | 2313   | -0.777662 | MST4     | 51765  | -0.730439 | CITED1  | 4435   | -0.80977  | TNFSF9  |
| FLJ14213 | 79899  | -0.735794 | MTMR11   | 10903  | 0.809932  | CKS2    | 1164   | 0.749771  | TNP2    |
| FLJ21062 | 79846  | -0.717254 | MUM1L1   | 139221 | 0.795274  | CLASP1  | 23332  | 0.74496   | TPO     |
| FLJ21075 | 80099  | 0.742524  | MYF6     | 4618   | 0.764031  | CLC     | 1178   | 0.728687  | TREML2  |
| FLJ21865 | 64772  | -0.721519 | MYO1A    | 4640   | 0.706095  | CLCA3   | 9629   | 0.733013  | TRIM23  |
| FLJ22662 | 79887  | -0.711145 | MYO1F    | 4542   | 0.765371  | CLCNKB  | 1188   | 0.769577  | TRPC2   |
| FLJ35776 | 649446 | -0.715993 | MYO3A    | 53904  | 0.721508  | CLDN17  | 26285  | 0.726424  | TSC2    |
| FLJ40244 | 254272 | 0.716832  | MYST2    | 11143  | 0.711899  | CLDN3   | 1365   | 0.717051  | TSPAN13 |
| FLJ41327 | 401045 | 0.799267  | NAIP     | 4671   | 0.777454  | CLEC2B  | 9976   | 0.755691  | TTC21A  |
| FLJ43505 | 400823 | -0.811386 | NANS     | 54187  | -0.729122 | CLEC2L  | 154790 | 0.841243  | TTY12   |
| FLJ44817 | 400224 | 0.736027  | NAT10    | 55226  | 0.701515  | CLEC4D  | 338339 | 0.776043  | TUBA3C  |
| FLJ45032 | 643853 | -0.764711 | NCAPD2   | 9918   | -0.710193 | CLIC3   | 9022   | 0.791609  | TYROBP  |
| FLJ45910 | 388512 | -0.817516 | NCBP2    | 22916  | 0.77369   | CLN3    | 1201   | 0.793603  | UBXD1   |
| FLJ45983 | 399717 | 0.805643  | NCLN     | 56926  | 0.797172  | CLN5    | 1203   | 0.767318  | UCK1    |
| FLJ46552 | 401230 | -0.811112 | NDUFA4L2 | 56901  | 0.792404  | CLNS1A  | 1207   | 0.723871  | UTP14C  |
| FOXDL1   | 200350 | -0.740233 | NDUFB8   | 4714   | 0.702945  | CLTC    | 1213   | -0.700823 | VAV1    |
| FOXJ1    | 2302   | -0.714203 | NFATC1   | 4772   | 0.751673  | CLTCL1  | 8218   | 0.713452  | WDR46   |
| FRAP1    | 2475   | 0.716821  | NFATC2   | 4773   | 0.712418  | CLUAP1  | 23059  | 0.729562  | WIPF2   |
| FRAT1    | 10023  | 0.784644  | NFXL1    | 152518 | 0.748045  | CMA1    | 1215   | 0.751537  | WISP1   |
| FREM3    | 166752 | 0.78583   | NLN      | 57486  | 0.788293  | CNOT4   | 4850   | -0.709527 | WNT6    |
| FRMD4A   | 55691  | 0.708178  | NLRP4    | 147945 | 0.80989   | CNTNAP2 | 26047  | 0.883562  | XRCC3   |
| FRMPD4   | 9758   | 0.795876  | NPEPL1   | 79716  | 0.760116  | COBRA1  | 25920  | 0.887634  | ZNF132  |
| FSCN1    | 6624   | 0.733354  | NPHS1    | 4868   | 0.795991  | COG5    | 10466  | 0.789588  | ZNF213  |
| FSD1L    | 83856  | -0.827652 | NPTXR    | 23467  | 0.80065   | COL10A1 | 1300   | 0.740863  | ZNF22   |
| FSHR     | 2492   | 0.718175  | NR1D2    | 9975   | 0.707662  | COL18A1 | 80781  | 0.758663  | ZNF225  |
| FTSJ2    | 29960  | -0.71756  | NR1H2    | 7376   | 0.734592  | COL1A1  | 1277   | 0.705854  | ZNF283  |
| FYB      | 2533   | -0.71793  | NRD1     | 4898   | 0.748963  | COMMD2  | 51122  | -0.771093 | ZNF431  |
| FYN      | 2534   | 0.744168  | NRL      | 4901   | 0.763334  | COPB1   | 1315   | -0.847179 | ZNF577  |
| G3BP2    | 9908   | -0.763979 | NXPH1    | 30010  | -0.752977 | COPS2   | 9318   | 0.771914  | ZNF79   |
| GABRA3   | 2556   | 0.814676  | ODC1     | 4953   | 0.759433  | COPS5   | 10987  | 0.716335  | ZNF84   |

**⚡ (N.1)**

| GeneID | Correlation |
|--------|-------------|
| 8086   | -0.739871   |
| 18     | -0.72581    |
| 10349  | 0.71152     |
| 22885  | 0.723533    |
| 84519  | -0.735944   |
| 10120  | 0.766329    |
| 2515   | 0.846859    |
| 196883 | 0.703744    |
| 2334   | -0.70061    |
| 55326  | 0.731951    |
| 10142  | 0.732496    |
| 208    | 0.719681    |
| 8854   | 0.708708    |
| 262    | 0.713034    |
| 9068   | 0.716769    |
| 81573  | -0.734289   |
| 324    | 0.797113    |
| 378708 | -0.701115   |
| 382    | -0.749138   |
| 401036 | -0.747523   |
| 440    | 0.761404    |
| 475    | 0.728667    |
| 477    | 0.792938    |
| 492    | 0.715859    |
| 549    | 0.760877    |
| 550    | -0.784282   |
| 548645 | -0.792214   |
| 598    | 0.719036    |
| 255877 | -0.741307   |
| 53630  | 0.768734    |
| 613    | 0.711159    |
| 56898  | 0.75557     |
| 54796  | -0.703394   |
| 10380  | -0.756611   |
| 54836  | -0.701441   |
| 284697 | 0.708734    |
| 119504 | 0.804327    |
| 26148  | 0.798452    |
| 51528  | 0.748919    |
| 55745  | 0.725178    |
| 63894  | 0.750741    |

**J656Y (N.3)**

| GeneName  | GeneID | Correlation |
|-----------|--------|-------------|
| ABCB9     | 23457  | -0.716533   |
| ANK2      | 287    | -0.74039    |
| APBA2     | 321    | -0.716375   |
| APOC3     | 345    | -0.70375    |
| AQP3      | 360    | -0.770925   |
| ASPHD1    | 253982 | -0.760199   |
| BARHL2    | 343472 | -0.723893   |
| C18orf17  | 125488 | -0.700023   |
| C19orf36  | 113177 | -0.736663   |
| C20orf19  | 55857  | -0.706204   |
| C2orf29   | 55571  | -0.716796   |
| CACNA1B   | 774    | -0.720383   |
| CACNA2D1  | 781    | -0.752884   |
| CCDC91    | 55297  | -0.708189   |
| CD27      | 939    | -0.747807   |
| CDH9      | 1007   | 0.724643    |
| CNOT2     | 4848   | -0.739057   |
| COMMD8    | 54951  | -0.745308   |
| COPS7B    | 64708  | -0.739197   |
| CYB5R2    | 51700  | -0.700779   |
| DHX29     | 54505  | -0.716331   |
| DMRTA1    | 63951  | -0.719395   |
| EIF2B3    | 8891   | -0.748787   |
| FAM69A    | 388650 | -0.72558    |
| FANCG     | 2189   | -0.723218   |
| FLJ43692  | 445328 | -0.700154   |
| FRMD1     | 79981  | -0.796286   |
| FSTL5     | 56884  | -0.71184    |
| GALP      | 85569  | -0.744505   |
| HGDF      | 3068   | -0.706161   |
| HGFAC     | 3083   | -0.700325   |
| IDH3G     | 3421   | -0.83125    |
| IFT172    | 26160  | -0.715664   |
| ITGB2     | 3689   | -0.721553   |
| KCNMB2    | 10242  | 0.708272    |
| KIAA0430  | 9665   | -0.734858   |
| KIAA2026  | 158358 | -0.746877   |
| LCE2A     | 353139 | -0.740964   |
| LMX1A     | 4009   | -0.729233   |
| LOC152118 | 152118 | -0.714209   |
| LOC440142 | 440142 | -0.706845   |

**J661Y (N.3)**

| GeneName   | GeneID    | Correlation |
|------------|-----------|-------------|
| ADAM17     | 6868      | 0.702045    |
| ATP1A2     | 477       | 0.720901    |
| C11orf24   | 53838     | 0.716292    |
| C1orf75    | 55248     | 0.725805    |
| C20orf186  | 149954    | 0.710565    |
| CABP5      | 56344     | 0.719885    |
| CLIC1      | 1192      | 0.719061    |
| CPNE9      | 151835    | 0.717014    |
| CRIM2      | 375616    | 0.710071    |
| CXorf30    | 645090    | 0.727541    |
| DBNDD2     | 55861     | 0.700266    |
| DDX20      | 11218     | 0.701268    |
| DFNB31     | 25861     | 0.737492    |
| DOK5       | 55816     | 0.708315    |
| EFNA5      | 1946      | 0.700599    |
| EXOSC7     | 23016     | 0.735332    |
| FCRL5      | 83416     | 0.714881    |
| FLJ20035   | 55601     | 0.734367    |
| FLJ23865   | 200317    | 0.722311    |
| FLJ39779   | 400223    | 0.72722     |
| GPR175     | 131601    | 0.718098    |
| GRLF1      | 2909      | 0.723963    |
| HIST1H2BO  | 8348      | 0.710509    |
| HPS4       | 89781     | 0.734656    |
| IL2        | 3558      | 0.726668    |
| INSR       | 3643      | 0.733641    |
| IRS4       | 8471      | 0.723269    |
| KIAA1627   | 57721     | 0.709408    |
| KIF5A      | 3798      | 0.712504    |
| KLB        | 152831    | 0.732526    |
| LOC1001295 | 100129975 | 0.725191    |
| LOC255649  | 255649    | 0.721104    |
| LOC388282  | 388282    | 0.709365    |
| LOC388524  | 388524    | 0.712021    |
| LOC441376  | 441376    | 0.719064    |
| LOC645573  | 645573    | 0.703861    |
| LRP1B      | 53353     | 0.724941    |
| LSM14A     | 26065     | 0.73277     |
| LSM6       | 11157     | 0.733833    |
| LTK        | 4058      | 0.705578    |
| MAPK15     | 225689    | 0.725991    |

**J563Y (N.6)**

| GeneName  | GeneID | Correlation |
|-----------|--------|-------------|
| ABCA3     | 21     | 0.706701    |
| ABCB5     | 340273 | 0.770631    |
| ACOXL     | 55289  | -0.720417   |
| ADD3      | 120    | 0.708813    |
| AP1B1     | 162    | -0.710294   |
| BIRC3     | 330    | -0.733366   |
| C11orf9   | 745    | 0.72801     |
| C1orf41   | 51668  | -0.745327   |
| C20orf4   | 25980  | 0.715398    |
| C21orf56  | 84221  | 0.715804    |
| CA14      | 23632  | 0.774751    |
| CBX7      | 23492  | 0.730864    |
| CCDC126   | 90693  | 0.883923    |
| CDH19     | 28513  | 0.775295    |
| CDR2L     | 30850  | 0.817717    |
| CKAP5     | 9793   | -0.769733   |
| CLSPN     | 63967  | -0.710674   |
| CNIH4     | 29097  | 0.842638    |
| CRTAM     | 56253  | -0.766936   |
| CTTNBP2NL | 55917  | -0.717245   |
| CWC15     | 51503  | 0.800915    |
| DEFB1     | 1672   | -0.790639   |
| DFFA      | 1676   | -0.716078   |
| DHX37     | 57647  | 0.8128      |
| DIRC1     | 116093 | -0.702536   |
| DIS3L     | 115752 | -0.734351   |
| DMRTC1    | 63947  | -0.715137   |
| DNAH7     | 56171  | 0.713572    |
| DNAJC4    | 3338   | 0.710668    |
| DTX3      | 196403 | 0.776441    |
| DUSP12    | 11266  | 0.728727    |
| EBF1      | 1879   | -0.722199   |
| ERCC6L    | 54821  | 0.849052    |
| EVL       | 51466  | 0.711993    |
| F13B      | 2165   | 0.768513    |
| FABP4     | 2167   | 0.736461    |
| FAM10A7   | 155019 | -0.74514    |
| FBXW2     | 26190  | 0.738275    |
| FKHL18    | 2307   | -0.703165   |
| FLJ13137  | 400793 | -0.763379   |
| FLJ20184  | 54848  | 0.71516     |



|        |           |           |        |           |          |           |           |            |           |           |
|--------|-----------|-----------|--------|-----------|----------|-----------|-----------|------------|-----------|-----------|
| 80127  | -0.741763 | LOC652755 | 652755 | -0.727981 | MGC40069 | 348035    | 0.712238  | FLJ31713   | 158263    | 0.720066  |
| 80072  | -0.775426 | LOC729866 | 729866 | 0.754295  | MRPS2    | 51116     | 0.70114   | FRMPD2     | 143162    | -0.799305 |
| 750    | 0.706835  | LOC730647 | 730647 | -0.704189 | MTMR4    | 9110      | 0.712771  | FST        | 10468     | 0.768089  |
| 283870 | 0.700825  | MPV17     | 4358   | -0.766705 | NCLN     | 56926     | 0.738042  | GAB4       | 128954    | 0.725344  |
| 90580  | 0.781229  | MRPL2     | 51069  | -0.726059 | NCOA7    | 135112    | 0.730309  | GPR18      | 2841      | 0.711294  |
| 339448 | 0.736601  | MYCBP     | 26292  | -0.780145 | NSAP11   | 100131275 | 0.72732   | GPR25      | 2848      | 0.720512  |
| 112770 | -0.707393 | NOL1      | 4839   | -0.768527 | OR5C1    | 392391    | 0.712434  | GRB7       | 2886      | 0.740573  |
| 79144  | 0.726802  | NUP155    | 9631   | -0.728716 | PDIA6    | 10130     | 0.720578  | GSN        | 2934      | 0.707701  |
| 128826 | -0.794237 | OR11H4    | 390442 | -0.702159 | PKLR     | 5313      | 0.711287  | GSTA3      | 2940      | -0.705016 |
| 441951 | 0.709524  | OR5H2     | 79310  | -0.71404  | PMS1     | 5378      | 0.72303   | GUCA1B     | 2979      | 0.726587  |
| 128710 | 0.722194  | PAIP1     | 10605  | -0.705103 | PRDM6    | 93166     | 0.723589  | HDGFL1     | 154150    | -0.701521 |
| 151477 | 0.714167  | PDE1C     | 5137   | -0.70927  | RFX2     | 5990      | 0.701298  | HSPG2      | 3339      | 0.720751  |
| 51244  | -0.755938 | PEX11G    | 92960  | -0.720714 | RNASE6   | 6039      | 0.708772  | IFITM3     | 10410     | -0.769867 |
| 140947 | 0.739649  | PIK3R2    | 5296   | -0.717421 | RPS19    | 6223      | 0.717041  | IGSF9B     | 22997     | 0.793611  |
| 133383 | -0.728046 | PPP1R2    | 5504   | -0.710532 | SIGLEC12 | 89858     | 0.7131    | INSIG1     | 3638      | 0.742897  |
| 731    | 0.710884  | PRSS23    | 11098  | -0.761403 | SIRT6    | 51548     | 0.732051  | IRS2       | 8660      | -0.723217 |
| 57118  | 0.715635  | PTGS1     | 5742   | -0.717978 | SLC25A32 | 81034     | 0.714419  | IVD        | 3712      | 0.81091   |
| 815    | 0.732442  | RPL23AP13 | 56969  | -0.732529 | SLC38A3  | 10991     | 0.707357  | JAK3       | 3718      | 0.710809  |
| 816    | 0.764046  | RPS7      | 6201   | -0.793298 | SPO11    | 23626     | 0.709153  | KCNK15     | 60598     | -0.743732 |
| 94032  | -0.773872 | SLC25A10  | 1468   | -0.748521 | TAP1     | 6890      | 0.729804  | KIAA0947   | 23379     | 0.738716  |
| 843    | -0.725601 | SLC39A2   | 29986  | -0.7632   | TAS2R16  | 50833     | 0.725757  | KIAA1394   | 57571     | 0.701712  |
| 9139   | -0.739241 | SLC47A1   | 55244  | -0.765547 | TH       | 7054      | 0.700608  | KIAA1524   | 57650     | 0.826384  |
| 916    | 0.735046  | SLC6A17   | 388662 | -0.713024 | TMEM39A  | 55254     | 0.737663  | KRBA1      | 84626     | 0.704472  |
| 1016   | 0.723397  | SLC6A7    | 6534   | -0.71468  | TNFSF9   | 8744      | 0.737344  | KRT27      | 342574    | -0.732235 |
| 6792   | 0.74238   | TAS2R48   | 259294 | -0.7349   | ZBTB37   | 84614     | 0.70199   | LAYN       | 143903    | -0.816872 |
| 1026   | 0.815733  | THSD1     | 55901  | -0.736966 | ZNF331   | 55422     | 0.705807  | LDOC1      | 23641     | 0.723117  |
| 1044   | -0.710134 | TIA1      | 7072   | -0.750174 | ZNF805   | 390980    | 0.736918  | LHFPL1     | 340596    | -0.711202 |
| 9857   | -0.729621 | TMBIM4    | 51643  | -0.70608  | ADH1C    | 126       | -0.700614 | LLGL1      | 3996      | 0.828856  |
| 23177  | -0.725932 | TRIM15    | 89870  | -0.756283 | ARL11    | 115761    | -0.776514 | LOC1001282 | 100128203 | -0.734375 |
| 1069   | -0.716013 | TSEN2     | 80746  | -0.724386 | ATP6V1C1 | 528       | -0.701545 | LOC1001303 | 100130315 | 0.792234  |
| 8837   | 0.715173  | TTC12     | 54970  | -0.73345  | BAG4     | 9530      | -0.751086 | LOC139249  | 139249    | 0.786999  |
| 5199   | 0.717614  | UEVLD     | 55293  | -0.707448 | C1orf85  | 112770    | -0.714778 | LOC152586  | 152586    | -0.777852 |
| 26973  | 0.721121  | WSCD2     | 9671   | -0.722012 | C8orf70  | 51101     | -0.708472 | LOC340096  | 340096    | -0.794663 |
| 4261   | -0.748191 | ZNF253    | 56242  | -0.789154 | CHCHD1   | 118487    | -0.778464 | LOC344423  | 344423    | -0.714249 |
| 9541   | -0.712415 |           |        |           | CYP4A22  | 284541    | -0.727355 | LOC391698  | 391698    | -0.700542 |
| 4435   | -0.806143 |           |        |           | DOK7     | 285489    | -0.779213 | LOC440459  | 440459    | -0.714117 |
| 1164   | 0.796216  |           |        |           | EMILIN3  | 90187     | -0.727682 | LOC441630  | 441630    | -0.715368 |
| 26285  | 0.791907  |           |        |           | EXOC3    | 11336     | -0.707179 | LOC442172  | 442172    | 0.756062  |
| 9022   | 0.723053  |           |        |           | EXOD1    | 112479    | -0.728816 | LOC541469  | 541469    | 0.773139  |
| 25920  | 0.770985  |           |        |           | EXOSC5   | 56915     | -0.705797 | LOC643181  | 643181    | -0.737458 |
| 25839  | -0.762108 |           |        |           | FAM43A   | 131583    | -0.739986 | LOC653269  | 653269    | 0.740376  |
| 1307   | 0.756879  |           |        |           | FLJ31438 | 130162    | -0.708738 | LOC730007  | 730007    | -0.775477 |
| 51805  | 0.701823  |           |        |           | FRMD6    | 122786    | -0.766959 | LRG1       | 116844    | -0.719567 |
| 1371   | 0.706359  |           |        |           | GDF11    | 10220     | -0.783543 | LRRC29     | 26231     | -0.710222 |
| 8738   | -0.82395  |           |        |           | HRH3     | 11255     | -0.702757 | LRRC50     | 123872    | 0.753286  |

|        |           |           |        |           |          |        |           |
|--------|-----------|-----------|--------|-----------|----------|--------|-----------|
| 1401   | 0.740164  | IL18BP    | 10068  | -0.708659 | LTBP3    | 4054   | 0.769114  |
| 1453   | 0.749191  | LCE1C     | 353133 | -0.750398 | LY75     | 4065   | -0.754704 |
| 1500   | 0.70721   | LGALS8    | 3964   | -0.766101 | LYRM2    | 57226  | -0.759574 |
| 6387   | 0.720961  | LOC284801 | 284801 | -0.708312 | LYZL2    | 119180 | 0.736245  |
| 645090 | 0.733178  | LOC387646 | 387646 | -0.71663  | MGC26718 | 440482 | -0.728596 |
| 139212 | 0.709613  | LOC390874 | 390874 | -0.721952 | MITD1    | 129531 | -0.722396 |
| 1586   | 0.717638  | LOC441133 | 441133 | -0.827969 | MSL3L1   | 10943  | -0.724817 |
| 1595   | 0.735282  | LYPD2     | 137797 | -0.726757 | MSTN     | 2660   | 0.802629  |
| 54360  | -0.79546  | MITD1     | 129531 | -0.702191 | MUTED    | 63915  | -0.746408 |
| 57062  | 0.720234  | MYL1      | 4632   | -0.781194 | NECAP1   | 25977  | 0.728286  |
| 7913   | 0.738341  | NELL1     | 4745   | -0.781306 | NEGR1    | 257194 | -0.71115  |
| 9162   | 0.736528  | NOLA1     | 54433  | -0.717119 | NXNL1    | 115861 | 0.703869  |
| 50846  | -0.728542 | NOV       | 4856   | -0.73119  | NXNL2    | 158046 | -0.716382 |
| 1733   | 0.725544  | NPM2      | 10361  | -0.781699 | OAZ1     | 4946   | 0.715682  |
| 23151  | 0.770534  | P117      | 125988 | -0.721499 | OR2B6    | 26212  | -0.77801  |
| 91050  | -0.700927 | PCDHGB4   | 8641   | -0.720564 | OR52J3   | 119679 | -0.720443 |
| 1742   | 0.762263  | PRRG4     | 79056  | -0.71691  | OR56B4   | 196335 | 0.708967  |
| 11144  | 0.768305  | RCOR3     | 55758  | -0.705153 | OR5BF1   | 127066 | -0.748662 |
| 23312  | 0.793762  | SAGE1     | 55511  | -0.700324 | OR9Q2    | 219957 | -0.702357 |
| 10281  | -0.749799 | SMR3A     | 26952  | -0.87408  | OXNAD1   | 92106  | 0.778917  |
| 50506  | 0.769018  | SRD5A2L2  | 253017 | -0.768209 | PAM      | 5066   | 0.732371  |
| 1844   | 0.744838  | STK39     | 27347  | -0.733099 | PDE10A   | 10846  | 0.763528  |
| 63904  | 0.71815   | SYAP1     | 94056  | -0.761863 | PDIA5    | 10954  | 0.764221  |
| 1859   | 0.748325  | SYT9      | 143425 | -0.729232 | PLA1A    | 51365  | 0.744239  |
| 55268  | 0.710657  | TBX15     | 6913   | -0.736035 | POLR2C   | 5432   | 0.702239  |
| 1947   | -0.701403 | TDRD10    | 126668 | -0.712802 | POU6F1   | 5463   | -0.707174 |
| 1979   | -0.72028  | ZNF76     | 7629   | -0.751278 | PRKCSH   | 5589   | 0.752424  |
| 1983   | 0.757292  |           |        |           | PRSS22   | 64063  | 0.771311  |
| 64097  | 0.74681   |           |        |           | PRTN3    | 5657   | -0.840577 |
| 7957   | 0.723192  |           |        |           | PVRL3    | 25945  | 0.708818  |
| 2081   | 0.757601  |           |        |           | RABGAP1L | 9910   | -0.719194 |
| 23233  | 0.706643  |           |        |           | RAET1G   | 353091 | 0.78318   |
| 149371 | 0.748627  |           |        |           | RCN3     | 57333  | 0.779604  |
| 23016  | 0.769632  |           |        |           | RGS8     | 85397  | 0.719339  |
| 2131   | -0.717319 |           |        |           | RHOG     | 391    | 0.702919  |
| 122509 | -0.713315 |           |        |           | RNF121   | 55298  | 0.737793  |
| 57464  | -0.703863 |           |        |           | ROCK2    | 9475   | 0.738085  |
| 10667  | 0.708934  |           |        |           | SAP18    | 10284  | -0.742636 |
| 84467  | -0.731342 |           |        |           | SCAPER   | 49855  | -0.700779 |
| 23149  | 0.712965  |           |        |           | SEL1L    | 6400   | 0.732476  |
| 112812 | -0.735291 |           |        |           | SERPIND1 | 3053   | 0.765933  |
| 54738  | 0.716015  |           |        |           | SHANK3   | 85358  | 0.768253  |
| 26281  | 0.727576  |           |        |           | SHOX2    | 6474   | -0.766306 |
| 9457   | 0.781814  |           |        |           | SHROOM4  | 57477  | -0.733207 |
| 23770  | 0.718586  |           |        |           | SIL1     | 64374  | 0.772909  |

|        |           |
|--------|-----------|
| 80099  | 0.815608  |
| 64926  | -0.70112  |
| 8456   | 0.780501  |
| 2475   | 0.790469  |
| 122786 | -0.740612 |
| 10129  | 0.749895  |
| 2534   | 0.870642  |
| 51083  | 0.71284   |
| 2643   | 0.737292  |
| 392255 | 0.742845  |
| 2733   | 0.709474  |
| 132158 | -0.709292 |
| 84572  | -0.72238  |
| 26003  | 0.754811  |
| 2820   | 0.706566  |
| 57720  | 0.742223  |
| 390212 | 0.727216  |
| 23432  | 0.724433  |
| 84636  | 0.728942  |
| 131601 | 0.734927  |
| 2863   | -0.709847 |
| 2882   | 0.75148   |
| 2913   | -0.761704 |
| 2935   | 0.727146  |
| 10542  | 0.718386  |
| 3052   | 0.771765  |
| 8226   | 0.763373  |
| 3206   | 0.78032   |
| 3205   | 0.742474  |
| 3221   | 0.791894  |
| 3290   | -0.733498 |
| 23553  | 0.750611  |
| 3423   | 0.803943  |
| 3441   | -0.740258 |
| 22807  | 0.707467  |
| 3558   | 0.753766  |
| 246778 | 0.719691  |
| 84684  | 0.747248  |
| 10379  | 0.719776  |
| 8471   | 0.739627  |
| 50805  | -0.767392 |
| 81618  | -0.736771 |
| 3792   | 0.72136   |
| 23172  | 0.760215  |
| 9778   | 0.762714  |

|          |        |           |
|----------|--------|-----------|
| SLAMF9   | 89886  | 0.710621  |
| SLC22A18 | 5002   | 0.85853   |
| SLC28A3  | 64078  | -0.718396 |
| SLC8A3   | 6547   | -0.758087 |
| SOST     | 50964  | 0.720568  |
| SPATA13  | 221178 | -0.712927 |
| SPSB4    | 92369  | 0.722198  |
| SPTLC1   | 10558  | -0.747774 |
| SUCNR1   | 56670  | 0.730149  |
| SUMO4    | 387082 | -0.710874 |
| SYVN1    | 84447  | 0.872875  |
| TATDN2   | 9797   | -0.729273 |
| TCEAL2   | 140597 | -0.741709 |
| TCEB3C   | 162699 | 0.73213   |
| TLR1     | 7096   | 0.729173  |
| TMEM182  | 130827 | -0.753436 |
| TMEM42   | 131616 | 0.707107  |
| TMEPAI   | 56937  | 0.834346  |
| TNPO1    | 3842   | 0.728791  |
| TPM4     | 7171   | -0.701864 |
| TRAIP    | 10293  | 0.723986  |
| TREX2    | 11219  | 0.811568  |
| TRIM5    | 85363  | 0.780722  |
| UBAC2    | 337867 | -0.731552 |
| UBE2A    | 7319   | 0.70114   |
| UBE2D4   | 51619  | 0.711657  |
| USP35    | 57558  | 0.735784  |
| USP6NL   | 9712   | 0.763461  |
| WDR86    | 349136 | -0.705231 |
| ZBTB8OS  | 339487 | -0.704264 |
| ZFAND6   | 54469  | -0.739834 |
| ZNF182   | 7569   | -0.750788 |
| ZNF215   | 7762   | -0.755122 |
| ZNF37A   | 7587   | -0.75947  |
| ZNF383   | 163087 | -0.86664  |
| ZNF542   | 147947 | -0.707027 |
| ZNF623   | 9831   | 0.747391  |
| ZNF66    | 7617   | 0.709076  |
| ZNF676   | 163223 | -0.719044 |

|           |           |
|-----------|-----------|
| 26049     | 0.728527  |
| 23366     | 0.741552  |
| 23325     | 0.709841  |
| 57662     | -0.712781 |
| 55554     | -0.733969 |
| 10219     | 0.728322  |
| 51574     | -0.719812 |
| 9113      | 0.702196  |
| 25875     | 0.735042  |
| 353174    | 0.729543  |
| 84708     | 0.779004  |
| 100129035 | -0.703459 |
| 100130274 | -0.731891 |
| 100130794 | 0.706509  |
| 100131814 | 0.791874  |
| 100132234 | 0.814145  |
| 100132728 | 0.723603  |
| 100133748 | 0.732391  |
| 100133752 | 0.708156  |
| 100134287 | 0.742045  |
| 120318    | 0.768603  |
| 139431    | 0.773019  |
| 139542    | 0.748652  |
| 144983    | -0.702208 |
| 150051    | -0.704044 |
| 150763    | -0.705299 |
| 152485    | 0.751646  |
| 159184    | 0.751657  |
| 162993    | 0.74315   |
| 285501    | 0.752109  |
| 388532    | 0.713279  |
| 389101    | -0.793159 |
| 391648    | 0.775135  |
| 391742    | -0.728106 |
| 392193    | 0.70315   |
| 401911    | 0.760472  |
| 441506    | -0.737663 |
| 641977    | -0.807551 |
| 644010    | -0.765238 |
| 646300    | -0.732686 |
| 646696    | 0.703019  |
| 646810    | 0.731984  |
| 651042    | 0.723481  |
| 653125    | -0.704755 |
| 728344    | -0.717191 |

|        |           |
|--------|-----------|
| 729960 | 0.817837  |
| 730144 | -0.781788 |
| 9361   | 0.722781  |
| 53353  | 0.749819  |
| 4036   | 0.724152  |
| 55222  | 0.706465  |
| 79782  | -0.701451 |
| 57633  | -0.701608 |
| 8581   | 0.818155  |
| 7851   | 0.742302  |
| 5607   | 0.721053  |
| 11184  | 0.772704  |
| 23031  | 0.744852  |
| 8932   | 0.751578  |
| 4160   | 0.777502  |
| 9439   | 0.773471  |
| 148808 | 0.710107  |
| 222234 | 0.708088  |
| 4289   | -0.814657 |
| 64210  | 0.709726  |
| 10199  | 0.777903  |
| 64232  | 0.751524  |
| 10903  | 0.798483  |
| 139221 | 0.740194  |
| 53904  | 0.803269  |
| 54187  | -0.72014  |
| 56901  | 0.784974  |
| 4710   | 0.725149  |
| 4763   | 0.761716  |
| 57486  | 0.722961  |
| 147945 | 0.750848  |
| 79050  | 0.758635  |
| 4858   | 0.76215   |
| 4868   | 0.702789  |
| 10361  | -0.753792 |
| 23467  | 0.719438  |
| 9975   | 0.746714  |
| 4898   | 0.766337  |
| 140767 | -0.700369 |
| 23279  | 0.722593  |
| 11248  | -0.762819 |
| 55301  | 0.703828  |
| 10215  | 0.719014  |
| 5956   | 0.75046   |
| 4993   | 0.795862  |

|        |           |
|--------|-----------|
| 388762 | -0.750886 |
| 219429 | 0.737085  |
| 119695 | -0.727427 |
| 5007   | 0.705054  |
| 114876 | 0.719711  |
| 220213 | 0.717399  |
| 5024   | 0.702542  |
| 5030   | 0.742446  |
| 23241  | -0.769298 |
| 84612  | 0.759668  |
| 23598  | 0.735345  |
| 5081   | -0.737107 |
| 64081  | -0.749125 |
| 56138  | 0.705112  |
| 5140   | -0.715394 |
| 57546  | 0.71      |
| 5195   | 0.705728  |
| 5290   | 0.743249  |
| 83394  | -0.704797 |
| 219990 | 0.741919  |
| 79156  | -0.800073 |
| 84898  | 0.751088  |
| 5378   | 0.703245  |
| 11128  | 0.749885  |
| 5455   | -0.816461 |
| 134187 | 0.735694  |
| 8497   | 0.776723  |
| 89801  | 0.75019   |
| 5528   | 0.716673  |
| 23398  | 0.70126   |
| 400735 | 0.713869  |
| 55170  | 0.788955  |
| 5624   | -0.704892 |
| 84432  | -0.748011 |
| 5676   | 0.718477  |
| 85481  | 0.731039  |
| 5724   | 0.723336  |
| 5791   | 0.701205  |
| 23369  | 0.779715  |
| 5874   | 0.700878  |
| 64760  | -0.736661 |
| 84839  | -0.710446 |
| 5925   | 0.711334  |
| 5990   | 0.738713  |
| 8625   | 0.737998  |

|        |           |
|--------|-----------|
| 64283  | -0.752335 |
| 401190 | 0.711162  |
| 6006   | 0.737009  |
| 22999  | 0.782831  |
| 9610   | 0.717301  |
| 83732  | 0.715531  |
| 54894  | 0.810431  |
| 23322  | 0.777311  |
| 6160   | 0.727334  |
| 27156  | 0.783596  |
| 25914  | 0.701785  |
| 55095  | 0.735025  |
| 55153  | 0.79088   |
| 29927  | 0.713072  |
| 10371  | -0.758476 |
| 10505  | -0.806619 |
| 94009  | 0.72201   |
| 9869   | 0.758585  |
| 166929 | 0.766592  |
| 399694 | 0.71553   |
| 6470   | 0.821803  |
| 55164  | 0.706757  |
| 6498   | 0.826754  |
| 23539  | 0.706323  |
| 10560  | 0.766136  |
| 6584   | 0.717363  |
| 293    | 0.713176  |
| 10861  | 0.723352  |
| 22950  | 0.710532  |
| 81796  | 0.709551  |
| 219537 | -0.708981 |
| 6642   | -0.725822 |
| 79856  | 0.73519   |
| 51375  | -0.722266 |
| 6672   | 0.714057  |
| 171169 | -0.72578  |
| 23384  | 0.760279  |
| 10653  | 0.762149  |
| 6704   | -0.709254 |
| 6767   | 0.718301  |
| 84620  | 0.785579  |
| 10610  | 0.794321  |
| 9515   | -0.704697 |
| 79723  | 0.745928  |
| 7064   | 0.725238  |

|        |           |
|--------|-----------|
| 26520  | 0.715878  |
| 342125 | 0.71745   |
| 65084  | 0.780663  |
| 55254  | 0.711864  |
| 8744   | 0.704222  |
| 7142   | 0.736827  |
| 7173   | -0.727695 |
| 79865  | -0.728731 |
| 373    | 0.75216   |
| 7221   | -0.70904  |
| 7249   | -0.712602 |
| 27075  | -0.775189 |
| 199223 | -0.717486 |
| 83867  | -0.700687 |
| 7278   | 0.701608  |
| 7305   | 0.755514  |
| 80700  | -0.745982 |
| 83549  | -0.772678 |
| 9724   | 0.728858  |
| 7409   | 0.768683  |
| 9277   | 0.774829  |
| 147179 | -0.760815 |
| 8840   | 0.72217   |
| 7475   | 0.7547    |
| 7517   | 0.723299  |
| 7691   | 0.7072    |
| 7760   | -0.740759 |
| 7570   | -0.756197 |
| 7768   | -0.776803 |
| 284349 | 0.703906  |
| 170959 | -0.708149 |
| 84765  | 0.729354  |
| 7633   | -0.729214 |
| 7637   | 0.702779  |



Supplementary Table 6: Pathway Enrichment in WebGestalt from correlations found in Supp. Table 5

| J607Y (N.1)             | Pathway                                            | Pathway ID | Number of Genes | Number of Expected | n ratio of en | p value | adj p value | GeneIDs                                                                                                                                                                                                                                                                                                                                                                                                                                                                                                                                   |
|-------------------------|----------------------------------------------------|------------|-----------------|--------------------|---------------|---------|-------------|-------------------------------------------------------------------------------------------------------------------------------------------------------------------------------------------------------------------------------------------------------------------------------------------------------------------------------------------------------------------------------------------------------------------------------------------------------------------------------------------------------------------------------------------|
| Pathway Commons pathway | Metabolism                                         | DB_ID:634  | 824             | 72                 | 24            | 2.95    | 4.36E-16    | 2.71E-13<br>MOC53,SUCLG1,PSME2,UCK1,GDA,PSME1,SLC6A8,MAPK14,NUP160,RPL11,ASNS,NUP133,GOT2,ADCY2,PSMA7,ANAPC11,APIP,MARCKS,RAPGEF3,LSM1,NAT2,AKT1,UROS,CYP7B1,RPL31,CPOX,NDUFB1,SLC35D1,NAPRT1,TPK1,CNOT10,PFAS,CYP1A2,LSM6,GNG10,UQCRRH,SMG9,PSMD6,ACP5,DLAT,PSMB1,MOCOS,PSMB5,RAE1,SLCSA6,LSM4,NDUFS4,RP113,PSMD2,EXOSC7,NDUFB4,CNOT4,CYP17A1,DBT,NUP85,PSMB6,GUK1,RPL8,GNG4,PPOX,NUP98,UBC,PSMB3,                                                                                                                                       |
| Pathway Commons pathway | Glypican pathway                                   | DB_ID:1459 | 1338            | 86                 | 39.59         | 2.17    | 2.08E-11    | 6.47E-09<br>RPS6KA3<br>PTH1R,MTOR,PSME2,EGF,CYSLTR2, DGKD,OR8D4,PSME1,PTGER2,CCL17,MAPK14,PDE3A,OR2C1,SOC51,ADCY2,OR10G7,PSMA7,OR51E2,ANAPC11,OR51Q1,RAPGEF3,SMPD2,NMS,AKT1,OR5A2,CXCR2,PTGER4,OR4D10,MC4R,ADM,OR1S2,PTGDR,OR6M1,CAB39,FGF7,OR6X1,ATP6VOC,PSMD6,TAAR1,CCKAR,OR52R1,OR4N5,OR8H2,PSMB1,PSMB5,KAT2B,SST,OR10H2,OR52N4,SCT,FSHR,OR2G3,CCK,PSMD2,OR8H1,PLCB2,OR5A1,PSMB6,RXFP3,IL17RD,OR51M1,LAMC1,FFAR2,OR1M1,PDE2A,OR4X1,PSMB3,OR10J5,UBC,QRFRP,IRS1,OR6K2,                                                                  |
| Pathway Commons pathway | Signal Transduction                                | DB_ID:331  | 1231            | 80                 | 36.42         | 2.2     | 6.31E-11    | 1.31E-08<br>KIDINS220,AGT,FRAT1,SHH,GPR39,FGF,OR2L2,RPS6KA3<br>TH1L,PSMB1,POLR2I,PSMB5,RDBP,RAE1,PSME2,PSME1,NUP160,NUP98,UBC,PSMB3,TPR,CCNT2,PSMD2,KPNA1,FYN,NUP133,PSMA7,                                                                                                                                                                                                                                                                                                                                                               |
| Pathway Commons pathway | HIV Infection                                      | DB_ID:239  | 204             | 27                 | 6.04          | 4.47    | 9.31E-11    | 1.45E-08<br>ANAPC11,AP1S1,PSMD6,TAFA9,NUP85,KPNB1,COBRA1,PSMB6<br>PARD6A,MTOR,NF1,PPM1D,ACTR3,EGF,CSNK2A1,CCL17,MAPK14,RPL11,RAB11FIP3,T,PA2G4,BRK1,SOC51,RELB,RNF111,MYBL1,CRP,ATF2,CTDSP2,CASP10,SNX1,CHP1,USO1,AKT1,VEGFA,SESN1,TRIM28,ADM,SKIL,PTPRJ,FYN,SMARCC1,CEBPZ,TLF1,TSG101,FKBP5,RCAN2,ARF6,TAFA9,INPPL1,KAT2B,GADD45G,TCF3,TMPRSS2,MAPK8IP3,DUSP5,NFATC3,CCND3,MDFIC,HSPD1,MYOCD,PLCB2,KPNB1,IFNA4,MMP12,IL17RD,ARHGFEF28,CTLA4,LAMC1,PATZ1,PLAUR,GBP3,FHL2,TCF7L2,IRS1,IFNA21,KPNA1,CITED1,S100A7,GADD45A,RRM2B,AGT,FGB,    |
| Pathway Commons pathway | LKB1 signaling events                              | DB_ID:1649 | 1308            | 82                 | 38.7          | 2.12    | 2.05E-10    | 2.55E-08<br>NCOR1,CTRC,CABLES1,RPS6KA3,BSK1,MSTS,CAB39<br>PARD6A,MTOR,NF1,PPM1D,ACTR3,EGF,CSNK2A1,CCL17,MAPK14,RPL11,RAB11FIP3,T,PA2G4,BRK1,SOC51,RELB,RNF111,MYBL1,CRP,ATF2,CTDSP2,CASP10,SNX1,CHP1,USO1,AKT1,VEGFA,SESN1,TRIM28,ADM,SKIL,PTPRJ,FYN,SMARCC1,CEBPZ,TLF1,TSG101,FKBP5,RCAN2,ARF6,TAFA9,INPPL1,KAT2B,GADD45G,TCF3,TMPRSS2,MAPK8IP3,DUSP5,NFATC3,CCND3,MDFIC,HSPD1,MYOCD,PLCB2,KPNB1,IFNA4,MMP12,IL17RD,ARHGFEF28,CTLA4,LAMC1,PATZ1,PLAUR,GBP3,FHL2,TCF7L2,IRS1,IFNA21,KPNA1,CITED1,S100A7,GADD45A,RRM2B,AGT,FGB,            |
| Pathway Commons pathway | IFN-gamma pathway                                  | DB_ID:1529 | 1296            | 79                 | 38.34         | 2.06    | 1.58E-09    | 2.59E-08<br>NCOR1,CTRC,CABLES1,RPS6KA3<br>PARD6A,MTOR,NF1,PPM1D,ACTR3,EGF,CSNK2A1,CCL17,MAPK14,RPL11,RAB11FIP3,T,PA2G4,BRK1,SOC51,RELB,RNF111,MYBL1,CRP,ATF2,CTDSP2,CASP10,SNX1,CHP1,USO1,AKT1,VEGFA,SESN1,TRIM28,ADM,SKIL,PTPRJ,FYN,SMARCC1,CEBPZ,TLF1,TSG101,FKBP5,RCAN2,ARF6,TAFA9,INPPL1,KAT2B,GADD45G,TCF3,TMPRSS2,MAPK8IP3,DUSP5,NFATC3,CCND3,MDFIC,HSPD1,MYOCD,PLCB2,KPNB1,IFNA4,MMP12,IL17RD,ARHGFEF28,CTLA4,LAMC1,PATZ1,PLAUR,GBP3,FHL2,TCF7L2,IRS1,IFNA21,KPNA1,CITED1,S100A7,GADD45A,RRM2B,AGT,FGB,                            |
| Pathway Commons pathway | Integrin family cell surface interactions          | DB_ID:1499 | 1378            | 83                 | 40.77         | 2.04    | 1.06E-09    | 2.59E-08<br>NCOR1,CTRC,CABLES1,RPS6KA3,MADCA1,PROC,CAM2,CD81<br>RPL11,RAB11FIP3,T,PA2G4,BRK1,SOC51,RELB,RNF111,MYBL1,CRP,ATF2,CTDSP2,CASP10,SNX1,CHP1,USO1,AKT1,VEGFA,SESN1,TRIM28,ADM,SKIL,PTPRJ,FYN,SMARCC1,CEBPZ,TLF1,TSG101,FKBP5,RCAN2,ARF6,TAFA9,INPPL1,KAT2B,GADD45G,TCF3,TMPRSS2,MAPK8IP3,DUSP5,NFATC3,CCND3,MDFIC,HSPD1,MYOCD,PLCB2,KPNB1,IFNA4,MMP12,IL17RD,ARHGFEF28,CTLA4,LAMC1,PATZ1,PLAUR,GBP3,FHL2,TCF7L2,IRS1,IFNA21,KPNA1,CITED1,S100A7,GADD45A,RRM2B,AGT,FGB,                                                           |
| Pathway Commons pathway | Signaling events mediated by focal adhesion kinase | DB_ID:1574 | 1288            | 79                 | 38.11         | 2.07    | 1.20E-09    | 2.59E-08<br>ADM,SKIL,PTPRJ,FYN,SMARCC1,CEBPZ,TLF1,TSG101,FKBP5,RCAN2,PARD6A,MTOR,NF1,PPM1D,ACTR3,EGF,CSNK2A1,CCL17,MAPK14,RPL11,RAB11FIP3,T,PA2G4,BRK1,SOC51,RELB,RNF111,MYBL1,CRP,ATF2,CTDSP2,CASP10,SNX1,CHP1,USO1,AKT1,VEGFA,SESN1,TRIM28,ADM,SKIL,PTPRJ,FYN,SMARCC1,CEBPZ,TLF1,TSG101,FKBP5,RCAN2,ARF6,TAFA9,INPPL1,KAT2B,GADD45G,TCF3,TMPRSS2,MAPK8IP3,DUSP5,NFATC3,CCND3,MDFIC,HSPD1,MYOCD,PLCB2,KPNB1,IFNA4,MMP12,IL17RD,ARHGFEF28,CTLA4,LAMC1,PATZ1,PLAUR,GBP3,FHL2,TCF7L2,IRS1,IFNA21,KPNA1,CITED1,S100A7,GADD45A,RRM2B,AGT,FGB, |
| Pathway Commons pathway | Insulin Pathway                                    | DB_ID:1466 | 1288            | 79                 | 38.11         | 2.07    | 1.20E-09    | 2.59E-08<br>NCOR1,CTRC,CABLES1,RPS6KA3                                                                                                                                                                                                                                                                                                                                                                                                                                                                                                    |

|                         |                                                                |            |      |    |       |      |          |          |                                                                                                                                                                                                                                                                                                                                                                                                                                                                                                                                                                                                                           |
|-------------------------|----------------------------------------------------------------|------------|------|----|-------|------|----------|----------|---------------------------------------------------------------------------------------------------------------------------------------------------------------------------------------------------------------------------------------------------------------------------------------------------------------------------------------------------------------------------------------------------------------------------------------------------------------------------------------------------------------------------------------------------------------------------------------------------------------------------|
| Pathway Commons pathway | Internalization of ErbB1                                       | DB_ID:1509 | 1288 | 79 | 38.11 | 2.07 | 1.20E-09 | 2.59E-08 | RPL11, RAB11FIP3, T, PA2G4, BRK1, SOCS1, RELB, RNF111, MYBL1, CRP, ATF2, CTDSP2, CASP10, SNX1, CHP1, USO1, AKT1, VEGFA, SESN1, TRIM28, ADM, SKIL, PTPRJ, FYN, SMARCC1, CEP2, TLE1, TSG101, FKBP5, RCAN2, ARF6, TAF9, INPPL1, KAT2B, GADD45G, TCF3, TMPPRS2, MAPK8IP3, DUSP5, NFATC3, CCND3, MDM2, HSPD1, MYOCD, PLCB2, KPNB1, IFNA4, MMP12,                                                                                                                                                                                                                                                                               |
| Pathway Commons pathway | Endothelins                                                    | DB_ID:1619 | 1307 | 52 | 17.12 | 3.04 | 1.89E-12 | 7.96E-10 | MAP2K5, RUNX2, ADCY4, PP1R13B, GNAL, CTDSPL, FKBP8, PAWR, IL13RA1, APC, BCL2L1, CDKN1A, RPL5, RPL11, CFLAR, VAV1, RB1, C12orf5, ADCY9, PIK3CA, DUSP10, RNF111, PPM1A, CXCL12, KRT19, MAP3K7, SMAD6, CRP, PTPRE, CAMK2A, IFNA4, SHMT1, PATZ1, AKT2, IL2, MALT1, NFATC2, IFNA16, SMURF2, PDE3B, ODC1, NFATC1, PTPRC, SKIL, GNAS, CITED1, FYN, MAP4K1, CAMK2B, TBL1X, SMURF1, CSNK1D                                                                                                                                                                                                                                         |
| Pathway Commons pathway | Regulation of CDC42 activity                                   | DB_ID:1456 | 770  | 36 | 10.09 | 3.57 | 7.40E-11 | 1.76E-09 | RUNX2, CTDSPL, FKBP8, PAWR, APC, BCL2L1, CDKN1A, VAV1, RB1, PIK3CA, ARHGFE2, DUSP10, RNF111, PPM1A, CXCL12, KRT19, MAP3K7, CRP, PTPRE, CAMK2A, IFNA4, LIMK2, PATZ1, IL2, ARHGDI, NFATC2, IFNA16, SMURF2, NFATC1, SKIL, FYN, CITED1, CAMK2B, HES5, TBL1X, SMURF1, MAP2K5, RUNX2, PPP1R13B, CTDSPL, FKBP8, PAWR, IL13RA1, APC, BCL2L1, CDKN1A, RPL5, RPL11, CFLAR, VAV1, RB1, C12orf5, PIK3CA, DUSP10, RNF111, PPM1A, CXCL12, KRT19, MAP3K7, SMAD6, CRP, PTPRE, CAMK2A, IFNA4, SHMT1, PATZ1, AKT2, IL2, MALT1, NFATC2, IFNA16, SMURF2, PDE3B, ODC1, NFATC1, PTPRC, SKIL, CITED1, FYN, MAP4K1, CAMK2B, TBL1X, SMURF1, CSNK1D |
| Pathway Commons pathway | IL3-mediated signaling events                                  | DB_ID:1564 | 1295 | 48 | 16.97 | 2.83 | 1.55E-10 | 1.76E-09 | MAP2K5, RUNX2, PPP1R13B, CTDSPL, FKBP8, PAWR, IL13RA1, APC, BCL2L1, CDKN1A, RPL5, RPL11, CFLAR, VAV1, RB1, C12orf5, PIK3CA, IRF9, DUSP10, RNF111, PPM1A, CXCL12, KRT19, MAP3K7, SMAD6, CRP, PTPRE, CAMK2A, IFNA4, SHMT1, PATZ1, AKT2, IL2, MALT1, NFATC2, IFNA16, SMURF2, PDE3B, ODC1, NFATC1, PTPRC, SKIL, CITED1, FYN, MAP4K1, CAMK2B, TBL1X, SMURF1, CSNK1D                                                                                                                                                                                                                                                            |
| Pathway Commons pathway | IFN-gamma pathway                                              | DB_ID:1529 | 1296 | 49 | 16.98 | 2.89 | 5.01E-11 | 1.76E-09 | MAP2K5, RUNX2, PPP1R13B, CTDSPL, FKBP8, PAWR, IL13RA1, APC, BCL2L1, CDKN1A, RPL5, RPL11, CFLAR, VAV1, RB1, C12orf5, PIK3CA, DUSP10, RNF111, PPM1A, CXCL12, KRT19, MAP3K7, SMAD6, CRP, PTPRE, CAMK2A, IFNA4, SHMT1, PATZ1, AKT2, IL2, MALT1, NFATC2, IFNA16, SMURF2, PDE3B, ODC1, NFATC1, PTPRC, SKIL, CITED1, FYN, MAP4K1, CAMK2B, TBL1X, SMURF1, CSNK1D                                                                                                                                                                                                                                                                  |
| Pathway Commons pathway | Signaling events mediated by Hepatocyte Growth Factor Receptor | DB_ID:1491 | 1293 | 48 | 16.94 | 2.83 | 1.47E-10 | 1.76E-09 | MAP2K5, RUNX2, PPP1R13B, CTDSPL, FKBP8, PAWR, IL13RA1, APC, BCL2L1, CDKN1A, RPL5, RPL11, CFLAR, VAV1, RB1, C12orf5, PIK3CA, DUSP10, RNF111, PPM1A, CXCL12, KRT19, MAP3K7, SMAD6, CRP, PTPRE, CAMK2A, IFNA4, SHMT1, PATZ1, AKT2, IL2, MALT1, NFATC2, IFNA16, SMURF2, PDE3B, ODC1, NFATC1, PTPRC, SKIL, CITED1, FYN, MAP4K1, CAMK2B, TBL1X, SMURF1, CSNK1D                                                                                                                                                                                                                                                                  |
| Pathway Commons pathway | EGFR-dependent Endothelin signaling events                     | DB_ID:1603 | 1289 | 48 | 16.89 | 2.84 | 1.33E-10 | 1.76E-09 | MAP2K5, RUNX2, PPP1R13B, CTDSPL, FKBP8, PAWR, IL13RA1, APC, BCL2L1, CDKN1A, RPL5, RPL11, CFLAR, VAV1, RB1, C12orf5, PIK3CA, DUSP10, RNF111, PPM1A, CXCL12, KRT19, MAP3K7, SMAD6, CRP, PTPRE, CAMK2A, IFNA4, SHMT1, PATZ1, AKT2, IL2, MALT1, NFATC2, IFNA16, SMURF2, PDE3B, ODC1, NFATC1, PTPRC, SKIL, CITED1, FYN, MAP4K1, CAMK2B, TBL1X, SMURF1, CSNK1D                                                                                                                                                                                                                                                                  |
| Pathway Commons pathway | GMCSF-mediated signaling events                                | DB_ID:1461 | 1292 | 48 | 16.93 | 2.84 | 1.43E-10 | 1.76E-09 | MAP2K5, RUNX2, PPP1R13B, CTDSPL, FKBP8, PAWR, IL13RA1, APC, BCL2L1, CDKN1A, RPL5, RPL11, CFLAR, VAV1, RB1, C12orf5, PIK3CA, DUSP10, RNF111, PPM1A, CXCL12, KRT19, MAP3K7, SMAD6, CRP, PTPRE, CAMK2A, IFNA4, SHMT1, PATZ1, AKT2, IL2, MALT1, NFATC2, IFNA16, SMURF2, PDE3B, ODC1, NFATC1, PTPRC, SKIL, CITED1, FYN, MAP4K1, CAMK2B, TBL1X, SMURF1, CSNK1D                                                                                                                                                                                                                                                                  |
| Pathway Commons pathway | Arf6 trafficking events                                        | DB_ID:1615 | 1288 | 48 | 16.87 | 2.84 | 1.29E-10 | 1.76E-09 | MAP2K5, RUNX2, PPP1R13B, GNAL, CTDSPL, FKBP8, PAWR, IL13RA1, APC, BCL2L1, CDKN1A, RPL5, RPL11, CFLAR, VAV1, RB1, C12orf5, PIK3CA, DUSP10, RNF111, PPM1A, CXCL12, KRT19, MAP3K7, SMAD6, CRP, PTPRE, CAMK2A, IFNA4, SHMT1, PATZ1, AKT2, IL2, MALT1, NFATC2, IFNA16, SMURF2, PDE3B, ODC1, NFATC1, PTPRC, SKIL, CITED1, FYN, MAP4K1, CAMK2B, TBL1X, SMURF1, CSNK1D                                                                                                                                                                                                                                                            |
| Pathway Commons pathway | Plasma membrane estrogen receptor signaling                    | DB_ID:1556 | 1301 | 50 | 17.04 | 2.93 | 1.77E-11 | 1.76E-09 | CAMK2B, TBL1X, SMURF1, CSNK1D, GNAS<br>MAP2K5, RUNX2, PPP1R13B, CTDSPL, FKBP8, PAWR, IL13RA1, APC, BCL2L1, CDKN1A, RPL5, RPL11, CFLAR, VAV1, RB1, C12orf5, PIK3CA, DUSP10, RNF111, PPM1A, CXCL12, KRT19, MAP3K7, SMAD6, CRP, PTPRE, CAMK2A, IFNA4, SHMT1, PATZ1, AKT2, IL2, MALT1, NFATC2, IFNA16, SMURF2, PDE3B, ODC1, NFATC1, PTPRC, SKIL, CITED1, FYN, MAP4K1, CAMK2B, TBL1X, SMURF1, CSNK1D                                                                                                                                                                                                                           |
| Pathway Commons pathway | IGF1 pathway                                                   | DB_ID:1482 | 1291 | 48 | 16.91 | 2.84 | 1.40E-10 | 1.76E-09 | TBL1X, SMURF1, CSNK1D                                                                                                                                                                                                                                                                                                                                                                                                                                                                                                                                                                                                     |

**J647E (N.1)**

|                         |                               |            |      |     |       |      |          |          |                                                                                                                                                                                                                                                                                                                                                                                                                                                                                                                                                                                                                                                                                                                                                                                                                                                                                                                                                                                                                                                                        |
|-------------------------|-------------------------------|------------|------|-----|-------|------|----------|----------|------------------------------------------------------------------------------------------------------------------------------------------------------------------------------------------------------------------------------------------------------------------------------------------------------------------------------------------------------------------------------------------------------------------------------------------------------------------------------------------------------------------------------------------------------------------------------------------------------------------------------------------------------------------------------------------------------------------------------------------------------------------------------------------------------------------------------------------------------------------------------------------------------------------------------------------------------------------------------------------------------------------------------------------------------------------------|
| Pathway Commons pathway | Arf6 trafficking events       | DB_ID:1615 | 1288 | 143 | 59.37 | 2.41 | 2.44E-22 | 6.76E-21 | DDIT3<br>TXN, NF1, CD3E, EGF, PPP1R3A, RET, TAP1, MAPK14, PA2G4, CCL26, T, SH2D1A, NFKB1, DLG1, PIK3CA, RNF111, PPM1, SNX, PTPR, TYRP1, TXLNG, YAP1, CAV1, HCK, ARF4, SKIL, PIAS3, CLTC, TNFRSF1A, FOSL1, GAB1, KAT2B, ITGA6, GADD45G, MAPK8IP3, TJP1, SIPA1, RB1, RPL23, BCL2, MYOCD, PLCB2, NFYB, ZNF385A, IL17RD, LAMC1, IL2RG, DOK1, CALM1, VLDLR, MALT1, PRDM1, OPRM1, CYFIP2, RASA1, TCF7L2, EXOC6, S100A7, INSR, AR, PPP1R13L, NOS2, EGLN1, MGAT3, WASF2, PRKAB1, PIDD, MTOR, PPM1D, SLC2A1, TP53, MAP2K1, PMS2, PPP2R2A, COL18A1, IL23A, PRKACA, ZFYVE9, RPL11, VAV1, RAB11FIP3, RRN3, MDM2, ACAP2, SOCS1, PRR5, SPI1, MAF, ATF2, SNAI2, CHP1, MAP3K3, AKT1, BGLAP, COL1A1, DVL3, CBL, IFNA5, FYN, HSPA4, COP55, CEBPZ, XRCC6, TAF9, BMPR1B, SPHK1, RASSF1, TGFBRI, ARPC4, PPP1CC, PAK4, PRKCH, ATF1, POLR3D, CHN2, HUWE1, CCND3, DAPP1, ITGA1, STAT3, KPNB1, RIN1, DUSP1, MAP3K1, TNF, PDPK1, FCGR2B, HES1, FOXO4, SOS1, PLAUR, HSPA1B, CITED1, AGT, AKT3, NFYC, CTRC, ITGB4, GPX1, IL5, BTRC, ZBTB33,                                                        |
| Pathway Commons pathway | Internalization of ErbB1      | DB_ID:1509 | 1288 | 143 | 59.37 | 2.41 | 2.44E-22 | 6.76E-21 | DDIT3<br>TXN, NF1, CD3E, EGF, PPP1R3A, RET, TAP1, MAPK14, PA2G4, CCL26, T, SH2D1A, NFKB1, DLG1, PIK3CA, RNF111, PPM1, SNX, PTPR, TYRP1, TXLNG, YAP1, CAV1, HCK, ARF4, SKIL, PIAS3, CLTC, TNFRSF1A, FOSL1, GAB1, KAT2B, ITGA6, GADD45G, MAPK8IP3, TJP1, SIPA1, RB1, RPL23, BCL2, MYOCD, PLCB2, NFYB, ZNF385A, IL17RD, LAMC1, IL2RG, DOK1, CALM1, VLDLR, MALT1, PRDM1, OPRM1, CYFIP2, RASA1, TCF7L2, EXOC6, S100A7, INSR, AR, PPP1R13L, NOS2, EGLN1, MGAT3, WASF2, PRKAB1, PIDD, MTOR, PPM1D, SLC2A1, TP53, MAP2K1, PMS2, PPP2R2A, COL18A1, IL23A, PRKACA, ZFYVE9, RPL11, VAV1, RAB11FIP3, RRN3, MDM2, ACAP2, SOCS1, PRR5, SPI1, MAF, ATF2, SNAI2, CHP1, MAP3K3, AKT1, BGLAP, COL1A1, DVL3, CBL, IFNA5, FYN, HSPA4, COP55, CEBPZ, XRCC6, TAF9, BMPR1B, SPHK1, RASSF1, TGFBRI, ARPC4, PPP1CC, PAK4, PRKCH, ATF1, POLR3D, CHN2, HUWE1, CCND3, DAPP1, ITGA1, STAT3, KPNB1, RIN1, DUSP1, MAP3K1, TNF, PDPK1, FCGR2B, HES1, FOXO4, SOS1, PLAUR, HSPA1B, CITED1, AGT, AKT3, NFYC, CTRC, ITGB4, GPX1, IL5, BTRC, ZBTB33,                                                        |
| Pathway Commons pathway | IL3-mediated signaling events | DB_ID:1564 | 1295 | 144 | 59.69 | 2.41 | 1.49E-21 | 6.76E-21 | DDIT3, CSF2RB<br>SH2D1A, NFKB1, DLG1, PIK3CA, RNF111, PPM1, SNX, PTPR, TYRP1, TXLNG, YAP1, CAV1, HCK, ARF4, SKIL, PIAS3, CLTC, TNFRSF1A, FOSL1, GAB1, KAT2B, ITGA6, GADD45G, MAPK8IP3, TJP1, SIPA1, RB1, RPL23, BCL2, MYOCD, PLCB2, NFYB, ZNF385A, IL17RD, LAMC1, IL2RG, DOK1, CALM1, VLDLR, MALT1, PRDM1, OPRM1, CYFIP2, RASA1, TCF7L2, EXOC6, S100A7, INSR, AR, PPP1R13L, NOS2, EGLN1, MGAT3, WASF2, PRKAB1, PIDD, MTOR, PPM1D, SLC2A1, TP53, MAP2K1, PMS2, PPP2R2A, COL18A1, IL23A, PRKACA, ZFYVE9, RPL11, VAV1, RAB11FIP3, RRN3, MDM2, ACAP2, SOCS1, PRR5, SPI1, MAF, ATF2, SNAI2, CHP1, MAP3K3, AKT1, BGLAP, COL1A1, DVL3, CBL, IFNA5, FYN, HSPA4, COP55, CEBPZ, XRCC6, TAF9, BMPR1B, SPHK1, RASSF1, TGFBRI, ARPC4, PPP1CC, PAK4, PRKCH, ATF1, POLR3D, CHN2, HUWE1, CCND3, DAPP1, ITGA1, STAT3, KPNB1, RIN1, DUSP1, MAP3K1, TNF, PDPK1, FCGR2B, HES1, FOXO4, SOS1, PLAUR, HSPA1B, CITED1, AGT, AKT3, NFYC, CTRC, ITGB4, GPX1, IL5, BTRC, ZBTB33,                                                                                                                  |
| Pathway Commons pathway | S1P1 pathway                  | DB_ID:1594 | 1288 | 143 | 59.37 | 2.41 | 2.44E-22 | 6.76E-21 | DUSP1, MAP3K1, TNF, PDPK1, FCGR2B, HES1, FOXO4, SOS1, PLAUR,<br>TXN, NF1, CD3E, EGF, PPP1R3A, RET, TAP1, MAPK14, PA2G4, CCL26, T, SH2D1A, NFKB1, DLG1, PIK3CA, RNF111, PPM1, SNX, PTPR, TYRP1, TXLNG, YAP1, CAV1, HCK, ARF4, SKIL, PIAS3, CLTC, TNFRSF1A, FOSL1, GAB1, KAT2B, ITGA6, GADD45G, MAPK8IP3, TJP1, SIPA1, RB1, RPL23, BCL2, MYOCD, PLCB2, NFYB, ZNF385A, IL17RD, LAMC1, IL2RG, DOK1, CALM1, VLDLR, MALT1, PRDM1, OPRM1, CYFIP2, RASA1, TCF7L2, EXOC6, S100A7, INSR, AR, PPP1R13L, NOS2, EGLN1, MGAT3, WASF2, PRKAB1, PIDD, MTOR, PPM1D, SLC2A1, TP53, MAP2K1, PMS2, PPP2R2A, COL18A1, IL23A, PRKACA, ZFYVE9, RPL11, VAV1, RAB11FIP3, RRN3, MDM2, ACAP2, SOCS1, PRR5, SPI1, MAF, ATF2, SNAI2, CHP1, MAP3K3, AKT1, BGLAP, COL1A1, DVL3, CBL, IFNA5, FYN, HSPA4, COP55, CEBPZ, XRCC6, TAF9, BMPR1B, SPHK1, RASSF1, TGFBRI, ARPC4, PPP1CC, PAK4, PRKCH, ATF1, POLR3D, CHN2, HUWE1, CCND3, DAPP1, ITGA1, STAT3, KPNB1, RIN1, DUSP1, MAP3K1, TNF, PDPK1, FCGR2B, HES1, FOXO4, SOS1, PLAUR, HSPA1B, CITED1, AGT, AKT3, NFYC, CTRC, ITGB4, GPX1, IL5, BTRC, ZBTB33, |

|                         |                                      |            |      |     |       |      |          |          |                                                                                                                                                                                                                                                                                                                                                                                                                                                                                                                                                                                                                                                                                                                                                                                                                                                                                                                                                                                                                                                                           |
|-------------------------|--------------------------------------|------------|------|-----|-------|------|----------|----------|---------------------------------------------------------------------------------------------------------------------------------------------------------------------------------------------------------------------------------------------------------------------------------------------------------------------------------------------------------------------------------------------------------------------------------------------------------------------------------------------------------------------------------------------------------------------------------------------------------------------------------------------------------------------------------------------------------------------------------------------------------------------------------------------------------------------------------------------------------------------------------------------------------------------------------------------------------------------------------------------------------------------------------------------------------------------------|
| Pathway Commons pathway | LKB1 signaling events                | DB_ID:1649 | 1308 | 146 | 60.29 | 2.42 | 5.17E-23 | 6.76E-21 | DDIT3, BRSK1, CAB39, MARK2<br>TXN, NF1, CD3E, EGF, PPP1R3A, RET, TAP1, MAPK14, PA2G4, CCL26, T, SH2D1A, NFKB1, DLG1, PIK3CA, RNF111, PPM1, SNX, PTPR, TYRP1, TXLNG, YAP1, CAV1, HCK, ARF4, SKIL, PIAS3, CLTC, TNFRSF1A, FOSL1, GAB1, KAT2B, ITGA6, GADD45G, MAPK8IP3, TJP1, SIPA1, RB1, RPL23, BCL2, MYOCD, PLCB2, NFYB, ZNF385A, IL17RD, LAMC1, IL2RG, DOK1, CALM1, VLDLR, MALT1, PRDM1, OPRM1, CYFIP2, RASA1, TCF7L2, EXOC6, S100A7, INSR, AR, PPP1R13L, NOS2, EGLN1, MGAT3, WASF2, PRKAB1, PIDD, MTOR, PPM1D, SLC2A1, TP53, MAP2K1, PMS2, PPP2R2A, COL18A1, IL23A, PRKACA, ZFYVE9, RPL11, VAV1, RAB11FIP3, RRN3, MDM2, ACAP2, SOCS1, PRR5, SPI1, MAF, ATF2, SNAI2, CHP1, MAP3K3, AKT1, BGLAP, COL1A1, DVL3, CBL, IFNA5, FYN, HSPA4, COP55, CEBPZ, XRCC6, TAF9, BMPR1B, SPHK1, RASSF1, TGFB1, ARPC4, PPP1CC, PAK4, PRKCH, ATF1, POLR3D, CHN2, HUWE1, CCND3, DAPP1, ITGA1, STAT3, KPNB1, RIN1, DUSP1, MAP3K1, TNF, PDPK1, FCGR2B, HES1, FOXO4, SOS1, PLAUR, HSPA1B, CITED1, AGT, AKT3, NFYC, CTRC, ITGB4, GPX1, IL5, BTRC, ZBTB33,                                       |
| Pathway Commons pathway | Syndecan-1-mediated signaling events | DB_ID:1454 | 1300 | 144 | 59.93 | 2.4  | 2.15E-22 | 6.76E-21 | DDIT3, BSG<br>TXN, NF1, CD3E, EGF, PPP1R3A, RET, TAP1, MAPK14, PA2G4, CCL26, T, SH2D1A, NFKB1, DLG1, PIK3CA, RNF111, PPM1, SNX, PTPR, TYRP1, TXLNG, YAP1, CAV1, HCK, ARF4, SKIL, PIAS3, CLTC, TNFRSF1A, FOSL1, GAB1, KAT2B, ITGA6, GADD45G, MAPK8IP3, TJP1, SIPA1, RB1, RPL23, BCL2, MYOCD, PLCB2, NFYB, ZNF385A, IL17RD, LAMC1, IL2RG, DOK1, CALM1, VLDLR, MALT1, PRDM1, OPRM1, CYFIP2, RASA1, TCF7L2, EXOC6, S100A7, INSR, AR, PPP1R13L, NOS2, EGLN1, MGAT3, WASF2, PRKAB1, PIDD, MTOR, PPM1D, SLC2A1, TP53, MAP2K1, PMS2, PPP2R2A, COL18A1, IL23A, PRKACA, ZFYVE9, RPL11, VAV1, RAB11FIP3, RRN3, MDM2, ACAP2, SOCS1, PRR5, SPI1, MAF, ATF2, SNAI2, CHP1, MAP3K3, AKT1, BGLAP, COL1A1, DVL3, CBL, IFNA5, FYN, HSPA4, COP55, CEBPZ, XRCC6, TAF9, BMPR1B, SPHK1, RASSF1, TGFB1, ARPC4, PPP1CC, PAK4, PRKCH, ATF1, POLR3D, CHN2, HUWE1, CCND3, DAPP1, ITGA1, STAT3, KPNB1, RIN1, DUSP1, MAP3K1, TNF, PDPK1, FCGR2B, HES1, FOXO4, SOS1, PLAUR, HSPA1B, CITED1, AGT, AKT3, NFYC, CTRC, ITGB4, GPX1, IL5, BTRC, ZBTB33,                                                       |
| Pathway Commons pathway | Insulin Pathway                      | DB_ID:1466 | 1288 | 143 | 59.37 | 2.41 | 2.44E-22 | 6.76E-21 | DUSP1, MAP3K1, TNF, PDPK1, FCGR2B, HES1, FOXO4, SOS1, PLAUR, TXN, NF1, CD3E, EGF, PPP1R3A, RET, TAP1, MAPK14, PA2G4, CCL26, T, SH2D1A, NFKB1, DLG1, PIK3CA, RNF111, PPM1, SNX, PTPR, TYRP1, TXLNG, YAP1, CAV1, HCK, ARF4, SKIL, PIAS3, CLTC, TNFRSF1A, FOSL1, GAB1, KAT2B, ITGA6, GADD45G, MAPK8IP3, TJP1, SIPA1, RB1, RPL23, BCL2, MYOCD, PLCB2, NFYB, ZNF385A, IL17RD, LAMC1, IL2RG, DOK1, CALM1, VLDLR, MALT1, PRDM1, OPRM1, CYFIP2, RASA1, TCF7L2, EXOC6, S100A7, INSR, AR, PPP1R13L, NOS2, EGLN1, MGAT3, WASF2, PRKAB1, PIDD, MTOR, PPM1D, SLC2A1, TP53, MAP2K1, PMS2, PPP2R2A, COL18A1, IL23A, PRKACA, ZFYVE9, RPL11, VAV1, RAB11FIP3, RRN3, MDM2, ACAP2, SOCS1, PRR5, SPI1, MAF, ATF2, SNAI2, CHP1, MAP3K3, AKT1, BGLAP, COL1A1, DVL3, CBL, IFNA5, FYN, HSPA4, COP55, CEBPZ, XRCC6, TAF9, BMPR1B, SPHK1, RASSF1, TGFB1, ARPC4, PPP1CC, PAK4, PRKCH, ATF1, POLR3D, CHN2, HUWE1, CCND3, DAPP1, ITGA1, STAT3, KPNB1, RIN1, DUSP1, MAP3K1, TNF, PDPK1, FCGR2B, HES1, FOXO4, SOS1, PLAUR, HSPA1B, CITED1, AGT, AKT3, NFYC, CTRC, ITGB4, GPX1, IL5, BTRC, ZBTB33, CSF2RB |
| Pathway Commons pathway | IL5-mediated signaling events        | DB_ID:1627 | 1292 | 144 | 59.56 | 2.42 | 1.20E-22 | 6.76E-21 | DDIT3, CSF2RB                                                                                                                                                                                                                                                                                                                                                                                                                                                                                                                                                                                                                                                                                                                                                                                                                                                                                                                                                                                                                                                             |

|                          |                                                              |            |      |     |       |      |          |          |                                                                                                                                                                                                                                                                                                                                                                                                                                                                                                                                                                                                                                                                                                                                                                                                                                                                                                                                                                                                                                                               |
|--------------------------|--------------------------------------------------------------|------------|------|-----|-------|------|----------|----------|---------------------------------------------------------------------------------------------------------------------------------------------------------------------------------------------------------------------------------------------------------------------------------------------------------------------------------------------------------------------------------------------------------------------------------------------------------------------------------------------------------------------------------------------------------------------------------------------------------------------------------------------------------------------------------------------------------------------------------------------------------------------------------------------------------------------------------------------------------------------------------------------------------------------------------------------------------------------------------------------------------------------------------------------------------------|
| Pathway Commons pathway  | Arf6 downstream pathway                                      | DB_ID:1585 | 1288 | 143 | 59.37 | 2.41 | 2.44E-22 | 6.76E-21 | SH2D1A, NFKB1, DLG1, PIK3CA, RNF111, PPM1, SNX, PTPR, TYRP1, TXLNG, YAP1, CAV1, HCK, ARF4, SKIL, PIAS3, CLTC, TNFRSF1A, FOSL1, GAB1, KAT2B, ITGA6, GADD45G, MAPK8IP3, TJP1, SIPA1, RB1, RPL23, BCL2, MYOCD, PLCB2, NFYB, ZNF385A, IL17RD, LAMC1, IL2RG, DOK1, CALM1, VLDLR, MALT1, PRDM1, OPRM1, CYFIP2, RASA1, TCF7L2, EXOC6, S100A7, INSR, AR, PPP1R13L, NOS2, EGLN1, MGAT3, WASF2, PRKAB1, PIDD, MTOR, PPM1D, SLC2A1, TP53, MAP2K1, PMS2, PPP2R2A, COL18A1, IL23A, PRKACA, ZFYVE9, RPL11, VAV1, RAB11FIP3, RRN3, MDM2, ACAP2, SOCS1, PRR5, SPI1, MAF, ATF2, SNAI2, CHP1, MAP3K3, AKT1, BGLAP, COL1A1, DVL3, CBL, IFNA5, FYN, HSPA4, COPS5, CEBPZ, XRCC6, TAF9, BMPR1B, SPHK1, RASSF1, TGFBR1, ARPC4, PPP1CC, PAK4, PRKCH, ATF1, POLR3D, CHN2, HUWE1, CCND3, DAPP1, ITGA1, STAT3, KPNB1, RIN1,                                                                                                                                                                                                                                                              |
| Pathway Commons pathway  | Integrin family cell surface interactions                    | DB_ID:1499 | 1378 | 150 | 63.52 | 2.36 | 1.50E-22 | 6.76E-21 | TXN, NF1, CD3E, EGF, PPP1R3A, RET, TAP1, MAPK14, PA2G4, CCL26, T, SH2D1A, NFKB1, DLG1, PIK3CA, RNF111, PPM1, SNX, PTPR, TYRP1, TXLNG, YAP1, CAV1, HCK, ARF4, SKIL, PIAS3, CLTC, TNFRSF1A, FOSL1, GAB1, KAT2B, ITGA6, GADD45G, MAPK8IP3, TJP1, SIPA1, RB1, RPL23, BCL2, MYOCD, PLCB2, NFYB, ZNF385A, IL17RD, LAMC1, IL2RG, DOK1, CALM1, VLDLR, MALT1, PRDM1, OPRM1, CYFIP2, RASA1, TCF7L2, EXOC6, S100A7, INSR, AR, PPP1R13L, NOS2, EGLN1, MGAT3, WASF2, PRKAB1, PIDD, MTOR, PPM1D, SLC2A1, TP53, MAP2K1, PMS2, PPP2R2A, COL18A1, IL23A, PRKACA, ZFYVE9, RPL11, VAV1, RAB11FIP3, RRN3, MDM2, ACAP2, SOCS1, PRR5, SPI1, MAF, ATF2, SNAI2, CHP1, MAP3K3, AKT1, BGLAP, COL1A1, DVL3, CBL, IFNA5, FYN, HSPA4, COPS5, CEBPZ, XRCC6, TAF9, BMPR1B, SPHK1, RASSF1, TGFBR1, ARPC4, PPP1CC, PAK4, PRKCH, ATF1, POLR3D, CHN2, HUWE1, CCND3, DAPP1, ITGA1, STAT3, KPNB1, RIN1, DUSP1, MAP3K1, TNF, PDPK1, FCGR2B, HES1, FOXO4, SOS1, PLAUR, HSPA1B, CITED1, AGT, AKT3, NFYC, CTRC, ITGB4, GPX1, IL5, BTRC, ZBTB33, DDIT3, ADAM2, CSG2R8, ICAM2, ICAM3, ITGB4, LAMB3, CD81 |
| <b>Miltefosine (N.1)</b> |                                                              |            |      |     |       |      |          |          |                                                                                                                                                                                                                                                                                                                                                                                                                                                                                                                                                                                                                                                                                                                                                                                                                                                                                                                                                                                                                                                               |
| Pathway Commons pathway  | Syndecan-1-mediated signaling events                         | DB_ID:1454 | 1300 | 37  | 11.42 | 3.24 | 4.96E-10 | 4.27E-09 | MAP2K5, TSC2, MTOR, NF1, CD3E, FKBP8, APC, BCL2L1, CDKN1A, CFLAR, VAV1, RB1, PIK3CA, CXCL12, CRP, PTPRE, CDX1, RIN1, CASP10, CAMK2A, SNX1, IFNA4, CAMSAP3, SHMT1, ARHGFE28, PATZ1, AKT2, IL2, PDE3B, SKIL, CITED1, FYN, MAP4K1, CAMK2B, CTNND1, ARF6, CSNK1D                                                                                                                                                                                                                                                                                                                                                                                                                                                                                                                                                                                                                                                                                                                                                                                                  |
| Pathway Commons pathway  | S1P1 pathway                                                 | DB_ID:1594 | 1288 | 37  | 11.32 | 3.27 | 3.85E-10 | 4.27E-09 | MAP2K5, TSC2, MTOR, NF1, CD3E, FKBP8, APC, BCL2L1, CDKN1A, CFLAR, VAV1, RB1, PIK3CA, CXCL12, CRP, PTPRE, CDX1, RIN1, CASP10, CAMK2A, SNX1, IFNA4, CAMSAP3, SHMT1, ARHGFE28, PATZ1, AKT2, IL2, PDE3B, SKIL, CITED1, FYN, MAP4K1, CAMK2B, CTNND1, ARF6, CSNK1D                                                                                                                                                                                                                                                                                                                                                                                                                                                                                                                                                                                                                                                                                                                                                                                                  |
| Pathway Commons pathway  | Internalization of ErbB1                                     | DB_ID:1509 | 1288 | 37  | 11.32 | 3.27 | 3.85E-10 | 4.27E-09 | MAP2K5, TSC2, MTOR, NF1, CD3E, FKBP8, APC, BCL2L1, CDKN1A, CFLAR, VAV1, RB1, PIK3CA, CXCL12, CRP, PTPRE, CDX1, RIN1, CASP10, CAMK2A, SNX1, IFNA4, CAMSAP3, SHMT1, ARHGFE28, PATZ1, AKT2, IL2, PDE3B, SKIL, CITED1, FYN, MAP4K1, CAMK2B, CTNND1, ARF6, CSNK1D                                                                                                                                                                                                                                                                                                                                                                                                                                                                                                                                                                                                                                                                                                                                                                                                  |
| Pathway Commons pathway  | IL3-mediated signaling events                                | DB_ID:1564 | 1295 | 37  | 11.38 | 3.25 | 4.46E-10 | 4.27E-09 | MAP2K5, TSC2, MTOR, NF1, CD3E, FKBP8, APC, BCL2L1, CDKN1A, CFLAR, VAV1, RB1, PIK3CA, CXCL12, CRP, PTPRE, CDX1, RIN1, CASP10, CAMK2A, SNX1, IFNA4, CAMSAP3, SHMT1, ARHGFE28, PATZ1, AKT2, IL2, PDE3B, SKIL, CITED1, FYN, MAP4K1, CAMK2B, CTNND1, ARF6, CSNK1D                                                                                                                                                                                                                                                                                                                                                                                                                                                                                                                                                                                                                                                                                                                                                                                                  |
| Pathway Commons pathway  | Urokinase-type plasminogen activator (uPA) and uPAR-mediated | DB_ID:1519 | 1288 | 37  | 11.32 | 3.27 | 3.85E-10 | 4.27E-09 | MAP2K5, TSC2, MTOR, NF1, CD3E, FKBP8, APC, BCL2L1, CDKN1A, CFLAR, VAV1, RB1, PIK3CA, CXCL12, CRP, PTPRE, CDX1, RIN1, CASP10, CAMK2A, SNX1, IFNA4, CAMSAP3, SHMT1, ARHGFE28, PATZ1, AKT2, IL2, PDE3B, SKIL, CITED1, FYN, MAP4K1, CAMK2B, CTNND1, ARF6, CSNK1D                                                                                                                                                                                                                                                                                                                                                                                                                                                                                                                                                                                                                                                                                                                                                                                                  |
| Pathway Commons pathway  | EGF receptor (ErbB1) signaling pathway                       | DB_ID:1550 | 1288 | 37  | 11.32 | 3.27 | 3.85E-10 | 4.27E-09 | MAP2K5, TSC2, MTOR, NF1, CD3E, FKBP8, APC, BCL2L1, CDKN1A, CFLAR, VAV1, RB1, PIK3CA, CXCL12, CRP, PTPRE, CDX1, RIN1, CASP10, CAMK2A, SNX1, IFNA4, CAMSAP3, SHMT1, ARHGFE28, PATZ1, AKT2, IL2, PDE3B, SKIL, CITED1, FYN, MAP4K1, CAMK2B, CTNND1, ARF6, CSNK1D                                                                                                                                                                                                                                                                                                                                                                                                                                                                                                                                                                                                                                                                                                                                                                                                  |
| Pathway Commons pathway  | PDGF receptor signaling pathway                              | DB_ID:1497 | 1293 | 37  | 11.36 | 3.26 | 4.28E-10 | 4.27E-09 | MAP2K5, TSC2, MTOR, NF1, CD3E, FKBP8, APC, BCL2L1, CDKN1A, CFLAR, VAV1, RB1, PIK3CA, CXCL12, CRP, PTPRE, CDX1, RIN1, CASP10, CAMK2A, SNX1, IFNA4, CAMSAP3, SHMT1, ARHGFE28, PATZ1, AKT2, IL2, PDE3B, SKIL, CITED1, FYN, MAP4K1, CAMK2B, CTNND1, ARF6, CSNK1D                                                                                                                                                                                                                                                                                                                                                                                                                                                                                                                                                                                                                                                                                                                                                                                                  |
| Pathway Commons pathway  | Class I PI3K signaling events                                | DB_ID:1553 | 1288 | 37  | 11.32 | 3.27 | 3.85E-10 | 4.27E-09 | MAP2K5, TSC2, MTOR, NF1, CD3E, FKBP8, APC, BCL2L1, CDKN1A, CFLAR, VAV1, RB1, PIK3CA, CXCL12, CRP, PTPRE, CDX1, RIN1, CASP10, CAMK2A, SNX1, IFNA4, CAMSAP3, SHMT1, ARHGFE28, PATZ1, AKT2, IL2, PDE3B, SKIL, CITED1, FYN, MAP4K1, CAMK2B, CTNND1, ARF6, CSNK1D                                                                                                                                                                                                                                                                                                                                                                                                                                                                                                                                                                                                                                                                                                                                                                                                  |
| Pathway Commons pathway  | Glypican pathway                                             | DB_ID:1459 | 1338 | 37  | 11.42 | 3.24 | 4.85E-10 | 4.27E-09 | MAP2K5, TSC2, MTOR, NF1, CD3E, FKBP8, APC, BCL2L1, CDKN1A, CFLAR, VAV1, RB1, PIK3CA, CXCL12, CRP, PTPRE, CDX1, RIN1, CASP10, CAMK2A, SNX1, IFNA4, CAMSAP3, SHMT1, ARHGFE28, PATZ1, AKT2, IL2, PDE3B, SKIL, CITED1, FYN, MAP4K1, CAMK2B, CTNND1, ARF6, CSNK1D                                                                                                                                                                                                                                                                                                                                                                                                                                                                                                                                                                                                                                                                                                                                                                                                  |
| Pathway Commons pathway  | IL5-mediated signaling events                                | DB_ID:1627 | 1292 | 37  | 11.35 | 3.26 | 4.19E-10 | 4.27E-09 | MAP2K5, TSC2, MTOR, NF1, CD3E, FKBP8, APC, BCL2L1, CDKN1A, CFLAR, VAV1, RB1, PIK3CA, CXCL12, CRP, PTPRE, CDX1, RIN1, CASP10, CAMK2A, SNX1, IFNA4, CAMSAP3, SHMT1, ARHGFE28, PATZ1, AKT2, IL2, PDE3B, SKIL, CITED1, FYN, MAP4K1, CAMK2B, CTNND1, ARF6, CSNK1D                                                                                                                                                                                                                                                                                                                                                                                                                                                                                                                                                                                                                                                                                                                                                                                                  |

**J656Y (N.3)**

|                         |                                                                     |           |     |   |      |       |          |        |                                            |
|-------------------------|---------------------------------------------------------------------|-----------|-----|---|------|-------|----------|--------|--------------------------------------------|
| Pathway Commons pathway | Deadenylation of mRNA                                               | DB_ID:863 | 22  | 3 | 0.04 | 79.47 | 7.29E-06 | 0.0005 | CNOT2, C2orf29, PAIP1                      |
| Pathway Commons pathway | Deadenylation-dependent mRNA decay                                  | DB_ID:862 | 46  | 3 | 0.08 | 38.01 | 6.98E-05 | 0.0022 | CNOT2, C2orf29, PAIP1                      |
| Pathway Commons pathway | Metabolism of RNA                                                   | DB_ID:865 | 282 | 5 | 0.48 | 10.33 | 0.0001   | 0.0022 | CNOT2, NUP155, RPS7, C2orf29, PAIP1        |
| Pathway Commons pathway | Transport of glucose and other sugars, bile salts and organic acids | DB_ID:973 | 95  | 3 | 0.16 | 18    | 0.0006   | 0.0077 | SLC6A7, SLC39A2, SLC47A1                   |
| Pathway Commons pathway | Metabolism of mRNA                                                  | DB_ID:864 | 235 | 4 | 0.4  | 9.92  | 0.0007   | 0.0077 | CNOT2, RPS7, C2orf29, PAIP1                |
| Pathway Commons pathway | Transmembrane transport of small molecules                          | DB_ID:937 | 379 | 5 | 0.65 | 7.69  | 0.0005   | 0.0077 | SLC6A7, AQP3, NUP155, SLC39A2, SLC47A1     |
| Pathway Commons pathway | SLC-mediated transmembrane transport                                | DB_ID:943 | 248 | 4 | 0.43 | 9.4   | 0.0009   | 0.0085 | SLC6A7, NUP155, SLC39A2, SLC47A1           |
| Pathway Commons pathway | Metabolism                                                          | DB_ID:634 | 824 | 6 | 1.41 | 4.24  | 0.0029   | 0.0239 | CNOT2, NUP155, RPS7, C2orf29, PAIP1, IDH3G |

**J661Y (N.3)**

|                         |                                                              |           |     |   |      |       |        |        |                                                        |
|-------------------------|--------------------------------------------------------------|-----------|-----|---|------|-------|--------|--------|--------------------------------------------------------|
| Pathway Commons pathway | Metabolism                                                   | DB_ID:634 | 824 | 8 | 2.12 | 3.77  | 0.0013 | 0.0158 | SLC25A32, EXOSC7, LSM6, PKLR, EXOSC5, RPS19, DDX20, TH |
| Pathway Commons pathway | mRNA Decay by 3' to 5' Exoribonuclease                       | DB_ID:860 | 11  | 2 | 0.03 | 70.64 | 0.0004 | 0.0158 | EXOSC7, EXOSC5                                         |
| Pathway Commons pathway | Destabilization of mRNA by KSRP                              | DB_ID:855 | 19  | 2 | 0.05 | 40.9  | 0.0011 | 0.0158 | EXOSC7, EXOSC5                                         |
| Pathway Commons pathway | Destabilization of mRNA by Butyrate Response Factor 1 (BRF1) | DB_ID:856 | 20  | 2 | 0.05 | 38.85 | 0.0012 | 0.0158 | EXOSC7, EXOSC5                                         |
| Pathway Commons pathway | Deadenylation-dependent mRNA decay                           | DB_ID:862 | 46  | 3 | 0.12 | 25.34 | 0.0002 | 0.0158 | EXOSC7, LSM6, EXOSC5                                   |
| Pathway Commons pathway | Metabolism of RNA                                            | DB_ID:865 | 282 | 5 | 0.73 | 6.89  | 0.0008 | 0.0158 | DDX20, EXOSC7, LSM6, EXOSC5, RPS19                     |
| Pathway Commons pathway | Destabilization of mRNA by Tristetraprolin (TTP)             | DB_ID:857 | 17  | 2 | 0.04 | 45.71 | 0.0009 | 0.0158 | EXOSC7, EXOSC5                                         |
| Pathway Commons pathway | Insulin receptor recycling                                   | DB_ID:247 | 28  | 2 | 0.07 | 27.75 | 0.0024 | 0.0255 | INSR, ATP6V1C1                                         |
| Pathway Commons pathway | Regulation of beta-cell development                          | DB_ID:35  | 109 | 3 | 0.28 | 10.69 | 0.0029 | 0.0274 | ONECUT3, PKLR, RPS19                                   |
| Pathway Commons pathway | Metabolism of mRNA                                           | DB_ID:864 | 235 | 4 | 0.6  | 6.61  | 0.0033 | 0.028  | EXOSC7, LSM6, EXOSC5, RPS19                            |

**J663Y (N.6)**

|                         |                                                        |            |     |   |      |       |          |        |                                                            |
|-------------------------|--------------------------------------------------------|------------|-----|---|------|-------|----------|--------|------------------------------------------------------------|
| Pathway Commons pathway | Polo-like kinase signaling events in the cell cycle    | DB_ID:1528 | 109 | 5 | 0.42 | 11.85 | 6.92E-05 | 0.0035 | CLSPN, OAZ1, ROCK2, CKAP5, ERCC6L                          |
| Pathway Commons pathway | PLK1 signaling events                                  | DB_ID:1483 | 104 | 5 | 0.4  | 12.42 | 5.53E-05 | 0.0035 | CLSPN, OAZ1, ROCK2, CKAP5, ERCC6L                          |
| Pathway Commons pathway | Activation of Chaperones by IRE1alpha                  | DB_ID:411  | 45  | 3 | 0.17 | 17.22 | 0.0007   | 0.0222 | SYVN1, TATDN2, PDIAS                                       |
| Pathway Commons pathway | Caspase cascade in apoptosis                           | DB_ID:1501 | 52  | 3 | 0.2  | 14.9  | 0.0011   | 0.0222 | GSN, BIRC3, DFFA                                           |
| Pathway Commons pathway | Apoptotic execution phase                              | DB_ID:1040 | 48  | 3 | 0.19 | 16.14 | 0.0009   | 0.0222 | GSN, BIRC3, DFFA                                           |
| Pathway Commons pathway | GPCR downstream signaling                              | DB_ID:477  | 553 | 8 | 2.24 | 3.74  | 0.0015   | 0.0253 | RHOG, OR52J3, OR56B4, PDE10A, OR9Q2, OR14C36, ROCK2, OR286 |
| Pathway Commons pathway | Unfolded Protein Response                              | DB_ID:409  | 63  | 3 | 0.24 | 12.3  | 0.0019   | 0.0274 | SYVN1, TATDN2, PDIAS                                       |
| Pathway Commons pathway | Sema4D induced cell migration and growth-cone collapse | DB_ID:18   | 22  | 2 | 0.09 | 23.48 | 0.0033   | 0.037  | RHOG, ROCK2                                                |
| Pathway Commons pathway | G alpha (12/13) signalling events                      | DB_ID:482  | 21  | 2 | 0.08 | 24.59 | 0.003    | 0.037  | RHOG, ROCK2                                                |
| Pathway Commons pathway | Sema4D in semaphorin signaling                         | DB_ID:16   | 27  | 2 | 0.1  | 19.13 | 0.0049   | 0.0388 | RHOG, ROCK2                                                |
